# Supplementary material
Source: Research Square preprint supplement (doi:10.21203/rs.3.rs-8986845/v1)
Supplement: Supplementary file 1 [file bf721fec1d9477f8c0ec751a.xlsx]

## Sheet: All Primary Data
Home Number	Intervention Type	Year of Intervention	Month of Intervention	Electric Consumption 2020	Electric Consumption 2021	Electric Consumption 2022	Electric Consumption 2023	Electric Consumption 2024	Electricity Price 2020	Electricity Price 2021	Electricity Price 2022	Electricity Price 2023	Electricity Price 2024	Gas Consumption 2020	Gas Consumption 2021	Gas Consumption 2022	Gas Consumption 2023	Gas Consumption 2024	Gas Price 2020	Gas Price 2021	Gas Price 2022	Gas Price 2023	Gas Price 2024	Energy Bill 2020	Energy Bill 2021	Energy Bill 2022	Energy Bill 2023	Energy Bill 2024	Rent Bill 2020	Rent Bill 2021	Rent Bill 2022	Rent Bill 2023	Rent Bill 2024	Grocery Bill 2020	Grocery Bill 2021	Grocery Bill 2022	Grocery Bill 2023	Grocery Bill 2024	Income 2020	Income 2021	Income 2022	Income 2023	Income 2024	% income spent on energy 2020	% income spent on energy 2021	% income spent on energy 2022	% income spent on energy 2023	% income spent on energy 2024	% income spent on rent 2020
Home 1	Renovation	2022	April	1240	1714	1710	1800	1700	0.1365	0.1493	0.3197	0.3795	0.2695	235	467	479	323	290	0.63	0.69	1.03	1.25	1.3	1692	1660	2604	1800	1600	6600	6900	7200	7560	8040	2880	3120	3240	3840	3240	13800	14100	14460	14940	15420	12.2609	11.773	18.0083	12.0482	10.3761	47.8261
Home 2	Renovation	2022	January	2000	2240	1990	1950	1905	0.1365	0.1493	0.3197	0.3795	0.2695	437	480	420	400	391	0.63	0.69	1.03	1.25	1.3	2312	2442	2530	1204	1140	8160	8160	8280	8400	8100	3800	4002	4290	5100	5250	27500	29000	31500	33000	35100	8.40727	8.42069	8.03175	3.64848	3.24786	29.6727
Home 3	Control			2053	2105	1956	1800	1941	0.1365	0.1493	0.3197	0.3795	0.2695	389	450	500	530	543	0.63	0.69	1.03	1.25	1.3	1584	2184	2088	2184	1980	8000	8200	8500	8800	9000	3120	3460	3550	3720	3890	18500	19000	19500	20100	21800	8.56216	11.4947	10.7077	10.8657	9.08257	43.2432
Home 4	Control			618	618	620	777	790	0.1365	0.1493	0.3197	0.3795	0.2695	1269	1240	1250	812	865	0.63	0.69	1.03	1.25	1.3	1068	780	1044	1800	1440	9000	9200	9400	9600	9800	3400	3370	3750	4320	3972	14824	14968	15400	16400	17200	7.20453	5.21112	6.77922	10.9756	8.37209	60.7124
Home 5	Control			900	945	1015	850	842	0.1365	0.1493	0.3197	0.3795	0.2695	595	690	720	650	700	0.63	0.69	1.03	1.25	1.3	1400	1496	2300	2100	2184	8130	8340	8550	8790	8900	6900	7860	9960	10860	11820	22600	25000	26200	27400	27400	6.19469	5.984	8.77863	7.66423	7.9708	35.9735
Home 6	Control			923	1000	970	917	912	0.1365	0.1493	0.3197	0.3795	0.2695	850	883	905	902	878	0.63	0.69	1.03	1.25	1.3	1970	2300	2479	2067	2184	6500	6600	6800	6980	7100	2880	2940	3540	4020	3324	15000	15400	15700	15900	16300	13.1333	14.9351	15.7898	13	13.3988	43.3333
Home 7	Subsidy	2022/2023	April and October	1700	1960	2300	2350	1892	0.14	0.14	0.26	0.26	0.26	524	540	590	630	530	0.55	0.55	0.75	0.75	0.75	526.2	571.4	1040.5	1083.5	889.42	6700	6850	6920	6340	4300	3000	3200	3600	3850	3920	17800	18000	20400	22600	21600	2.95618	3.17444	5.10049	4.79425	4.11769	37.6404
Home 8	Control			2050	2450	2800	2999	2900	0.19	0.2	0.32	0.39	0.27	600	650	680	590	630	0.78	0.99	1.03	1.35	1.5	857.5	1133.5	1596.4	1966.11	1728	4800	4800	4800	4800	4800	1959	2600	2890	3100	3420	8500	8900	9800	10200	11400	10.0882	12.736	16.2898	19.2756	15.1579	56.4706
Home 9	Control			2320	2490	2356	2430	2400	0.25	0.38	0.39	0.41	0.42	395	403	449	423	453	1.4	1.4	1.4	1.4	1.9	1133	1510.4	1547.44	1588.5	1868.7	5150	5280	5400	5600	5810	2852	3010	3410	3960	3800	12800	13100	13560	15000	15700	8.85156	11.5298	11.4118	10.59	11.9025	40.2344
Home 10	Renovation		2022-03-01	2940	3010	3150	3120	3100	0.19	0.26	0.26	0.22	0.22	930	940	540	503	488	0.6	0.6	0.82	0.82	0.8	1116.6	1346.6	1261.8	1098.86	1072.4	7200	7400	8000	8400	8800	4300	4500	6000	6100	5950	31600	32000	32800	33200	35600	3.53354	4.20812	3.84695	3.30982	3.01236	22.7848
Home 11	Control			2900	2950	2800	2700	2650	0.35	0.35	0.35	0.4	0.4	1150	1200	1100	1030	1368	1.45	1.45	1.45	1.35	1.35	2682.5	2772.5	2575	2470.5	2906.8	5200	5200	5500	5500	5600	6300	6660	7660	9165	8190	18000	18800	19300	19400	20900	14.9028	14.7473	13.342	12.7345	13.9081	28.8889
Home 12	Control			2900	2950	3320	3365	3291	0.4	0.41	0.41	0.41	0.41	909	930	952	1224	1420	0.7	0.7	0.7	0.7	0.7	1796.3	1860.5	2027.6	2236.45	2343.31	5100	5100	5200	5200	5350	3000	3250	3400	4000	3800	12900	13300	13900	14990	16000	13.9248	13.9887	14.5871	14.9196	14.6457	39.5349
Home 13	Subsidy	2022/2023	April and October	1590	1650	1820	1750	1675	0.145	0.35	0.35	0.2	0.4	675	699	770	735	689	0.55	0.7	0.7	0.7	1.4	601.8	1066.8	1176	864.5	1634.6	4800	4800	4800	4900	4900	2000	2359	2800	2750	2400	8500	8900	11600	12000	11400	7.08	11.9865	10.1379	7.20417	14.3386	56.4706
Home 14	Control			3700	3750	3500	3400	3300	0.38	0.38	0.44	0.44	0.44	1300	1350	1230	1160	1350	0.89	0.89	1.52	1.52	1.52	2150	2400	2751	3748	3799	5800	5800	5800	5800	5800	7190	7350	8430	9240	8400	39000	41000	44400	45000	47000	5.51282	5.85366	6.19595	8.32889	8.08298	14.8718
Home 15	Control			2000	2100	2500	2010	2300	0.18	0.19	0.19	0.19	0.29	990	1050	950	900	990	0.95	1.32	1.52	1.52	1.52	1300.5	1785	1919	1749.9	2171.8	6200	6200	6200	6200	6200	2900	3200	3600	3800	3800	18500	19000	20300	21500	21500	7.02973	9.39474	9.4532	8.13907	10.1014	33.5135
Home 16	Renovation	2023	Jan	3100	3000	2490	2300	2514	0.1365	0.1493	0.3197	0.3795	0.2695	1400	800	700	660	663	0.63	0.69	1.03	1.25	1.3	2800	1600	1400	1520	1496	7000	7100	7220	7600	8000	3100	3500	4500	4800	5000	12600	13100	13560	14995	15410	22.2222	12.2137	10.3245	10.1367	9.70798	55.5556
Home 17	Control			2150	2030	2300	1750	1822	0.1365	0.1493	0.3197	0.3795	0.2695	580	654	357	657	622	0.63	0.69	1.03	1.25	1.3	2085	2200	2340	2200	1902	8400	8400	8400	8400	8400	7950	8500	9600	10666	10000	26000	29000	32000	35000	38000	8.01923	7.58621	7.3125	6.28571	5.00526	32.3077
Home 18	Renovation	2022	February	3320	3490	4104	4100	4000	0.32	0.38	0.4	0.4	0.4	2450	2330	1580	1599	1620	0.92	1	1.3	1.4	1.35	3316.4	3656.2	3695.6	3878.6	3787	9400	9500	10200	10600	11000	7500	7840	9640	9900	10000	41000	43000	45000	47000	49000	8.08878	8.50279	8.21244	8.25234	7.72857	22.9268
Home 19	Control			840	813	790	760	801	0.1365	0.1493	0.3197	0.3795	0.2695	769	806	856	996	1452	0.63	0.69	1.03	1.25	1.3	986	1100	1200	1392	2652	7800	7900	8050	8200	8400	3300	3400	3600	3950	3650	15500	15600	15800	15950	16900	6.36129	7.05128	7.59494	8.72727	15.6923	50.3226
Home 20	Renovation	2022	2022-03-01	900	915	992	1000	959	0.22	0.22	0.28	0.28	0.26	880	903	726	707	689	0.6	0.66	0.82	0.62	0.63	2628	3060	2136	924	900	8000	8150	8600	9000	9400	4000	4320	5200	5250	5400	17800	18000	18400	18600	19800	14.764	17	11.6087	4.96774	4.54545	44.9438
Home 21	Renovation	2022	June	2400	2650	3000	3200	3290	0.1365	0.1493	0.3197	0.3795	0.2695	2800	3000	2100	1750	1620	0.63	0.69	1.03	1.25	1.3	2091.6	2465.64	3122.1	3401.9	2992.66	5500	5750	6500	6750	7000	2900	3000	2760	2950	3000	15000	15400	15700	15750	16254	13.944	16.0107	19.886	21.5994	18.4118	36.6667
Home 22	Control			4340	4500	4450	4400	4320	0.1365	0.1493	0.3197	0.3795	0.2695	603	640	670	630	620	0.63	0.69	1.03	1.25	1.3	2942	3045	3200	2900	2896	6600	6600	6600	6600	6600	7000	7400	9000	10430	10600	37000	39000	41000	43000	45000	7.95135	7.80769	7.80488	6.74419	6.43556	17.8378
Home 23	Control			1496	1529	1490	1380	1484	0.38	0.38	0.38	0.38	0.47	490	486	550	512	483	1.32	1.32	1.32	1.32	1.42	1215.28	1222.54	1292.2	1200.24	1383.34	5000	5100	5200	5300	5400	3300	3550	3550	3810	3740	12800	13100	13555	14990	15590	9.49438	9.33237	9.53301	8.00694	8.87325	39.0625
Home 24	Renovation	2022	April	920	1090	1410	1400	1346	0.31	0.34	0.39	0.39	0.4	450	440	320	92	77	0.83	0.99	1.33	1.35	1.4	658.7	806.2	975.5	670.2	646.2	5240	5460	6000	6500	6950	4900	5200	6100	6000	6050	12600	13100	13360	14995	15410	5.22778	6.1542	7.30165	4.46949	4.19338	41.5873
Home 25	Control			1740	1730	1719	1834	1841	0.4	0.4	0.4	0.4	0.4	517	509	504	551	556	0.89	0.89	0.89	1.01	1.01	1156.13	1145.01	1136.16	1290.11	1297.96	5200	5250	5350	5400	5500	3100	3250	3350	3600	3550	15000	15600	15800	15950	16400	7.70753	7.33981	7.19089	8.08846	7.91439	34.6667
Home 26	Control			3700	3750	3500	3400	3300	0.37	0.37	0.4	0.42	0.42	1300	1350	1230	1160	1100	0.65	0.65	1.09	1.09	1.09	2214	2265	2740.7	2692.4	2585	8400	8550	8650	8800	9000	7000	8000	10400	11300	11754	29000	30200	31200	32350	34290	7.63448	7.5	8.78429	8.32272	7.53864	28.9655
Home 27	Control			1900	2045	2140	2005	2130	0.4	0.4	0.4	0.4	0.4	800	920	1008	953	930	1.4	1.4	1.4	1.4	1.4	1880	2106	2267.2	2136.2	2154	6805	6955	7105	7335	7560	2954	3600	4512	4874	4600	15000	15400	15705	16000	16350	12.5333	13.6753	14.4362	13.3512	13.1743	45.3667
Home 28	Control			1019	1250	1400	450	442	0.37	0.37	0.4	0.4	0.4	219	302	300	156	142	1.36	1.36	1.45	1.39	1.39	674.87	873.22	995	396.84	374.18	6920	6920	6920	7300	7300	2400	2800	3100	3350	3250	12700	13150	13450	14500	15105	5.31394	6.64046	7.39777	2.73683	2.47719	54.4882
Home 29	Control			1095	1189	1390	1230	1108	0.35	0.36	0.37	0.38	0.31	580	740	619	582	590	1.34	1.35	1.42	1.42	1.31	1160.45	1427.04	1393.28	1293.84	720	7020	7020	7020	7320	7320	3000	3250	3400	4000	3800	15600	17200	15400	16900	19000	7.43878	8.29674	9.04727	7.65586	3.78947	45
Home 30	Renovation	2022	March	3855	4000	4210	4810	4100	0.1365	0.1493	0.3197	0.3795	0.2695	867	990	592	400	470	0.63	0.69	1.03	1.25	1.3	2620	2800	3450	3910	3300	8300	8600	9200	9800	10500	5500	6100	7220	7660	7540	35000	39000	43000	47000	51000	7.48571	7.17949	8.02326	8.31915	6.47059	23.7143
Home 31	Renovation	2022	April	1800	2000	2300	2250	2320	0.23	0.28	0.28	0.28	0.28	750	770	460	455	430	1.12	1.12	1.4	1.4	1.4	1254	1422.4	1288	1267	1251.6	6900	7000	7500	8000	8500	4000	4450	5300	5520	5490	15000	15400	15700	15750	16254	8.36	9.23636	8.20382	8.04444	7.70026	46
Home 32	Renovation	2022	June	2200	2420	2840	2900	2780	0.1365	0.1493	0.3197	0.3795	0.2695	1500	1605	810	862	870	0.63	0.69	1.03	1.25	1.3	1245.3	1468.76	1742.25	2178.05	1880.21	5500	5750	6500	6750	7000	4900	5600	6300	7200	7320	18000	18800	19300	19400	20198	6.91833	7.81253	9.02719	11.2271	9.30889	30.5556
Home 33	Renovation	2023	Jan	3200	3350	3650	3600	3430	0.34	0.36	0.4	0.4	0.38	1200	1190	703	712	682	1.22	1.39	1.42	1.29	1.19	2552	2860.1	2458.26	2358.48	2114.98	8400	8600	9200	10000	10900	7850	9200	11300	11900	11600	31600	32000	32800	33200	35600	8.07595	8.93781	7.4947	7.10386	5.94096	26.5823
Home 34	Control			1276	1398	1450	1272	1430	0.32	0.33	0.4	0.4	0.4	683	690	710	801	1035	1.35	1.35	1.4	1.4	1.4	1330.37	1392.84	1574	1630.2	2021	6400	6700	7100	7500	8000	4000	3800	4105	4380	4005	28800	30000	33500	36000	38500	4.61934	4.6428	4.69851	4.52833	5.24935	22.2222
Home 35	Subsidy	2022/2023	April and October	1060	1154	1740	1470	1168	0.28	0.34	0.39	0.39	0.32	142	209	370	356	104	1.33	1.39	1.39	1.3	1.3	485.66	682.87	1192.9	1036.1	508.96	5000	5105	5320	5500	5720	3800	4240	4900	4900	4300	17800	18000	18400	18600	19500	2.72843	3.79372	6.48315	5.57043	2.61005	28.0899
Home 36	Renovation	2022	October	1555	1347	1421	1384	1336	0.32	0.32	0.32	0.32	0.32	959	1123	874	915	729	1.29	1.29	1.29	1.29	1.29	1734.71	1879.71	1582.18	1623.23	1367.93	6200	6500	7000	7600	8400	4000	4500	5820	6300	6260	17800	18000	18400	18600	19800	9.74556	10.4428	8.5988	8.72704	6.90874	34.8315
Home 37	Control			4000	3900	4100	4620	2550	0.35	0.37	0.42	0.42	0.42	1700	1985	2230	1800	2055	1.2	1.2	1.2	1.35	1.35	3440	3825	4398	4370.4	3845.25	9400	10000	11400	12300	13100	3500	4100	4760	4950	4830	36300	39000	41400	44000	45500	9.47658	9.80769	10.6232	9.93273	8.4511	25.8953
Home 38	Control			5350	5400	5600	5904	5300	0.22	0.2	0.4	0.4	0.4	642	700	683	630	648	1.12	1.19	1.19	1.19	1.34	1896.04	1913	3052.77	3111.3	2988.32	8750	8925	9200	9525	9650	4300	4800	5115	5460	5010	26000	29000	31000	34000	36000	7.29246	6.59655	9.84765	9.15088	8.30089	33.6538
Home 39	Control			1699	1286	1423	1201	1042	0.35	0.35	0.39	0.39	0.39	549	613	692	686	644	1.25	1.25	1.25	1.3	1.3	1280.9	1216.35	1419.97	1360.19	1243.58	6800	7000	7250	7510	7790	3500	4100	4760	4950	4830	25000	26000	27000	29000	31000	5.1236	4.67827	5.25915	4.69031	4.01155	27.2
Home 40	Subsidy	2022/2023	April and October	1440	1430	1945	1962	1440	0.18	0.18	0.4	0.4	0.37	519	549	795	812	601	0.57	0.57	1.39	1.39	1.23	555.03	570.33	1883.05	1913.48	1272.03	6420	6600	6800	7000	7200	3005	3470	3900	4350	3520	19800	20000	22200	24400	21800	2.80318	2.85165	8.48221	7.84213	5.835	32.4242
Home 41	Control			3300	3350	3150	3050	3000	0.32	0.34	0.34	0.33	0.2933	1150	1200	1100	1030	980	1.35	1.35	1.35	1.35	1.35	2608.5	2759	2556	2397	2202.9	6400	6500	6600	6700	6900	3400	3700	4100	4350	4650	32000	33900	35600	36900	38000	8.15156	8.13864	7.17978	6.49593	5.79711	20
Home 42	Renovation	2022	April	2450	2254	1764	1761	1697	0.28	0.28	0.37	0.37	0.37	1243	828	326	372	398	1.22	1.22	1.34	1.34	1.34	2202.46	1641.28	1089.52	1150.05	1161.21	6890	7290	7900	8490	9020	5800	6400	7020	7000	6950	27000	31900	32600	33400	35000	8.15726	5.14508	3.34209	3.44326	3.31774	25.5185
Home 43	Control			4600	4750	4900	4890	4812	0.3	0.3	0.3	0.28	0.28	1561	1890	718	1090	890	1.3	1.3	1.3	1.32	1.32	3409.3	3882	2403.4	2808	2522.16	8010	8230	8400	8620	8460	6700	9200	11790	12420	12500	42000	43000	44000	45000	46000	8.11738	9.02791	5.46227	6.24	5.48296	19.0714
Home 44	Renovation	2022	June	1189	1357	1203	1278	1412	0.38	0.38	0.4	0.4	0.4	294	445	180	134	170	1.32	1.32	1.38	1.38	1.35	839.9	1103.06	729.6	696.12	794.3	7600	7800	8350	8800	9150	4500	5000	6090	6230	6740	17800	18000	18400	18600	19800	4.71854	6.12811	3.96522	3.74258	4.01162	42.6966
Home 45	Renovation	2022	May	2040	2240	2440	2500	2490	0.32	0.32	0.38	0.38	0.38	750	770	664	623	620	0.122	1.32	1.39	1.39	1.39	744.3	1733.2	1850.16	1815.97	1808	7900	8300	9000	9800	10000	5000	5300	5700	5850	5800	16000	16500	16800	17450	17620	4.65188	10.5042	11.0129	10.4067	10.2611	49.375
Home 46	Subsidy			790	652	1012	1030	733	0.21	0.4	0.4	0.38	0.38	690	483	801	895	450	1.2	1.37	1.37	1.37	1.29	993.9	3168	1502.17	1920	859.04	8320	8500	8700	8920	9180	3850	4010	4600	4780	4200	31700	32100	34600	35000	35200	3.13533	9.86916	4.34153	5.48571	2.44045	26.2461
Home 47	Control			1980	1559	1237	2411	1359	0.35	0.35	0.4	0.4	0.4	717	712	468	646	1024	1.25	1.25	1.4	1.4	1.4	1589.25	1435.65	1150	2400	1964	6800	7010	7350	7650	7900	2800	3100	2700	2950	3015	12700	13100	13560	15000	15400	12.5138	10.9592	8.48083	16	12.7532	53.5433
Home 48	Renovation	2023	January	2100	2150	2420	2430	2390	0.16	0.16	0.22	0.22	0.2	2240	2331	1437	1366	1240	1.3	1.3	1.3	1.4	1.35	3248	3374.3	2400.5	2447	2152	7100	7330	7790	8210	8520	4100	4300	5005	5320	5490	15000	15400	15700	15750	16254	21.6533	21.911	15.2898	15.5365	13.2398	47.3333
Home 49	Renovation	2022	December	2760	2940	4220	4050	4150	0.19	0.19	0.25	0.26	0.24	1813	1999	2030	1005	1049	1.15	1.15	1.11	1.09	1.09	2609.35	2857.45	3308.3	2148.45	2139.41	6400	6600	6800	7600	8400	5200	5500	6010	6700	6600	14600	15100	15560	16995	17410	17.8723	18.9235	21.2616	12.6417	12.2884	43.8356
Home 50	Renovation	2022	December	4490	4530	4628	7054	6174	0.22	0.22	0.27	0.28	0.23	1400	1520	1523	880	756	1.17	1.17	1.09	1.02	1.02	2625.8	2775	2909.63	2872.72	2191.14	6400	6600	6800	7600	8400	6000	6450	6640	6480	7020	17800	18000	18400	18600	19800	14.7517	15.4167	15.8132	15.4447	11.0664	35.9551
Home 51	Renovation	2022	December	806	815	831	1042	934	0.28	0.29	0.33	0.33	0.33	2938	2682	1099	719	606	1.39	1.39	1.02	1.02	0.82	4309.5	3964.33	1395.21	1077.24	805.14	6300	6500	6700	7500	8200	8400	8822	8450	10850	10840	16600	17100	18500	20005	22800	25.9608	23.1832	7.54168	5.38485	3.53132	37.9518
Home 52	Control			2900	2950	2800	2700	2650	0.38	0.38	0.38	0.38	0.38	1300	1350	1050	100	890	1.39	1.39	1.39	1.39	1.39	2909	2997.5	2523.5	2400	1964	9100	9100	9450	9450	10000	4000	4350	4750	4780	4510	36300	37000	38500	41000	42500	8.01377	8.10135	6.55455	5.85366	4.62118	25.0689
Home 53	Subsidy	2022/2023	April and October	1790	1880	2075	2140	1964	0.27	0.27	0.4	0.4	0.38	750	765	905	940	742	1.3	1.3	1.45	1.45	1.42	1458.3	1502.1	2142.25	2219	1799.96	6550	6740	6920	7140	7320	3650	3900	4450	4640	4000	18300	18500	20700	20800	20300	7.96885	8.11946	10.349	10.6683	8.8668	35.7923
Home 54	Subsidy	2022/2023	April and October	3930	3890	4212	4011	3915	0.19	0.19	0.44	0.44	0.39	1278	1301	1429	1355	1285	0.67	0.67	1.29	1.29	1.23	1602.96	1610.77	3696.69	3512.79	3107.4	5700	5805	5955	6200	6405	6600	7450	9880	10100	9000	20900	22000	24800	26600	25800	7.66967	7.32168	14.906	13.206	12.0442	27.2727
Home 55	Renovation	2022	March	1650	1720	2045	2000	1992	0.38	0.38	0.38	0.21	0.21	2005	2002	1410	801	792	1.32	1.32	1.3	1.3	1.3	3273.6	3296.24	2610.1	1461.3	1447.92	5650	5950	6550	7150	7550	4680	4990	5002	5620	5640	12600	13100	13560	14995	15410	25.981	25.1621	19.2485	9.74525	9.39598	44.8413
Home 56	Renovation	2022	May	5100	5300	5540	5620	5735	0.28	0.32	0.35	0.35	0.32	1620	1812	1320	1301	1272	1.35	1.35	1.4	1.4	1.4	3615	4142.2	3787	3788.4	3616	12400	12800	13400	14300	14784	9600	10820	11920	12602	13800	30500	30900	31400	31900	32400	11.8525	13.4052	12.0605	11.8759	11.1605	40.6557
Home 57	Subsidy	2022/2023	April and October	2742	2865	3010	2990	2830	0.38	0.39	0.39	0.39	0.39	895	950	1050	1090	960	1.22	1.22	1.42	1.42	1.42	2133.86	2276.35	2664.9	2713.9	2466.9	9040	9410	9800	10180	10440	4300	4690	5010	5280	4900	26500	27000	31800	33800	31500	8.0523	8.43093	8.38019	8.02929	7.83143	34.1132
Home 58	Renovation	2022	March	2320	2350	2640	2620	2590	0.21	0.21	0.33	0.33	0.33	802	770	430	430	420	1.19	1.19	1.21	1.21	1.21	1441.58	1409.8	1391.5	1384.9	1362.9	8020	8220	8640	9080	9520	4450	4850	5640	5820	6010	17800	18000	18400	18600	19800	8.09876	7.83222	7.5625	7.4457	6.88333	45.0562
Home 59	Renovation	2022	February	2112	2160	2630	2570	2590	0.19	0.19	0.24	0.24	0.24	818	792	620	582	560	0.75	0.75	0.67	0.67	0.67	1014.78	1004.4	1046.6	1006.74	996.8	5400	5660	6000	6410	6820	4620	5020	5560	5640	5820	12600	13100	13560	14995	15410	8.05381	7.66718	7.71829	6.71384	6.46853	42.8571
Home 60	Renovation	2023	January	2400	2480	2650	2630	2490	0.34	0.36	0.4	0.4	0.4	900	1040	612	614	573	1.12	1.19	1.22	1.22	1.22	1824	2130.4	1806.64	1801.08	1695.06	8400	8600	9200	10000	10900	3750	3886	4350	4500	4520	15000	15400	15700	15750	17500	12.16	13.8338	11.5073	11.4354	9.68606	56
Home 61	Renovation	2022	December	902	915	981	1130	1144	0.28	0.29	0.3	0.3	0.3	1460	1550	1020	742	714	1.19	1.19	1.02	1.02	0.82	1989.96	2109.85	1334.7	1095.84	928.68	6300	6500	6700	7500	8200	4500	4920	5600	5700	5440	15000	15400	15700	15750	16254	13.2664	13.7003	8.50127	6.95771	5.71355	42
Home 62	Renovation	2022	December	1998	2060	2490	2670	2500	0.21	0.21	0.21	0.22	0.22	1312	1400	886	702	680	0.86	0.86	0.78	0.78	0.78	1547.9	1636.6	1213.98	1134.96	1080.4	6600	6800	7000	7800	8500	5740	5996	6420	6560	6670	17800	18000	18400	18600	19800	8.69607	9.09222	6.59772	6.10194	5.45657	37.0787
Home 63	Renovation	2022	December	2004	2090	2512	2700	2652	0.39	0.39	0.39	0.39	0.39	1002	1056	740	612	600	1.39	1.39	1.39	1.39	1.39	2174.34	2282.94	2008.28	1903.68	1868.28	6600	6800	7000	7800	8500	6012	6120	7400	7340	7215	26600	29000	30800	31200	33600	8.17421	7.87221	6.52039	6.10154	5.56036	24.812
Home 64	Renovation	2022	December	852	875	1130	1245	1412	0.3	0.3	0.3	0.3	0.3	919	917	1095	602	542	0.95	0.95	0.95	0.95	0.95	1128.65	1133.65	1379.25	945.4	938.5	5300	5500	5700	6500	7200	3400	3600	4220	4400	4310	12600	13100	13560	14995	15410	8.95754	8.65382	10.1715	6.30477	6.0902	42.0635
Home 65	Renovation	2022	December	3800	3912	4424	4389	4175	0.22	0.22	0.31	0.28	0.25	1612	1700	1300	612	558	1.17	1.17	1.33	1.02	1.02	2722.04	2849.64	3100.44	1853.16	1612.91	6600	6800	7000	7800	8500	8200	9000	9100	11300	11520	31600	32000	32800	33200	35600	8.61405	8.90512	9.45256	5.58181	4.53065	20.8861
Home 66	Subsidy	2022/2023	April and October	2350	2600	2884	3015	2740	0.36	0.4	0.4	0.42	0.4	814	890	1219	1300	912	1.09	1.27	1.25	1.35	1.4	1733.26	2170.3	2677.35	3021.3	2372.8	8100	8250	8500	8750	9000	3960	4480	5000	5150	4900	15000	15400	17500	17550	16254	11.5551	14.0929	15.2991	17.2154	14.5983	54
Home 67	Subsidy	2022/2023	April and October	3800	3990	4200	4400	3880	0.39	0.4	0.45	0.45	0.44	1300	1350	1230	1160	1100	1.29	1.39	1.45	1.4	1.4	3159	3472.5	3673.5	3604	3247.2	6770	6910	7140	7360	7580	7500	8100	10300	11000	10000	12600	13100	15300	16800	15410	25.0714	26.5076	24.0098	21.4524	21.072	53.7302
Home 68	Subsidy	2022/2023	April and October	3300	3350	3550	3750	3000	0.335	0.376	0.398	0.44	0.44	1340	1500	1840	2020	965	1.19	1.24	1.39	1.39	1.29	2700.1	3119.6	3970.5	4457.8	2564.85	6400	6620	6860	7060	7240	5600	6650	8840	8960	8540	30000	31000	33800	35800	36000	9.00033	10.0632	11.747	12.452	7.12458	21.3333
Home 69	Subsidy	2022/2023	April and October	2100	2150	2300	2430	2050	0.36	0.376	0.35	0.35	0.34	1340	1450	1960	1940	1460	0.76	0.88	1.24	1.24	1.22	1774.4	2084.4	3235.4	3256.1	2478.2	6230	6230	6230	6230	6230	3700	4200	4860	5020	4640	15000	15400	17500	17555	16254	11.8293	13.5351	18.488	18.548	15.2467	41.5333
Home 70	Control	2022/2023	April and October	1812	1750	1790	1870	1860	0.35	0.35	0.4	0.4	0.4	450	640	680	650	620	1.26	1.26	1.32	1.32	1.32	1201.2	1418.9	1613.6	1606	1562.4	8200	8250	8300	8400	8512	3200	3690	4010	4200	4105	15000	15600	15900	16250	16250	8.008	9.09551	10.1484	9.88308	9.61477	54.6667
Home 71	Subsidy	2022/2023	April and October	4000	4215	4500	4550	4090	0.35	0.35	0.4	0.4	0.4	1550	1660	1991	2014	1756	1.4	1.4	1.45	1.45	1.42	3570	3799.25	4686.95	4740.3	4129.52	8800	8900	9000	9100	9200	8300	8900	10450	11450	10100	31700	33000	36100	36800	36100	11.2618	11.5129	12.9832	12.8812	11.4391	27.7603
Home 72	Subsidy	2022/2023	April and October	3100	3350	3150	3050	3000	0.29	0.29	0.4	0.4	0.4	1200	1200	1360	1390	1090	1.4	1.4	1.45	1.45	1.45	2579	2651.5	3232	3235.5	2780.5	6200	6400	6600	6800	7010	5750	6650	8840	8960	8540	13000	13500	15300	15900	15410	19.8385	19.6407	21.1242	20.3491	18.0435	47.6923
Home 73	Subsidy	2022/2023	April and October	2100	2150	2000	1950	1900	0.33	0.38	0.38	0.28	0.4	800	840	800	750	720	1.4	1.4	1.4	1.2	1.4	1813	1993	1880	1446	1768	5400	5400	5600	5600	5800	2900	3010	3452	3964	3754	12600	13100	15200	16800	15410	14.3889	15.2137	12.3684	8.60714	11.4731	42.8571
Home 74	Coaching	2022	March	3700	3750	3200	3300	3150	0.26	0.29	0.32	0.32	0.25	1300	1350	1200	1142	1080	1.12	1.15	1.32	1.32	1.07	2418	2640	2608	2563.44	1943.1	6700	6900	7100	7300	7500	10000	12400	16800	14900	13500	15600	15100	15560	16995	17410	15.5	17.4834	16.7609	15.0835	11.1608	42.9487
Home 75	Coaching	2022	January	2100	2150	2000	1950	1900	0.3	0.36	0.37	0.36	0.36	750	770	680	650	620	1.09	1.15	1.35	1.38	1.2	1447.5	1659.5	1658	1599	1428	7000	7250	7500	7750	8000	1800	2000	2020	2060	1995	15000	15400	15700	15750	16254	9.65	10.776	10.5605	10.1524	8.78553	46.6667
Home 76	Coaching	2022	December	2400	2600	2140	2100	2090	0.33	0.33	0.44	0.4	0.4	640	692	606	586	555	1.29	1.29	1.39	1.39	1.39	1617.6	1750.68	1783.94	1654.54	1607.45	8800	9400	10000	10300	10800	2000	2400	2350	2418	2300	37800	38000	38400	38600	39800	4.27937	4.60705	4.64568	4.28637	4.03882	23.2804
Home 77	Coaching	2022	February	2000	2450	1920	1850	1800	0.34	0.35	0.4	0.38	0.37	701	791	667	650	623	1.23	1.29	1.29	1.25	1.2	1542.23	1877.89	1628.43	1515.5	1413.6	7500	7700	7990	8210	8400	3300	3800	3500	3270	3700	18800	19000	19400	19600	21800	8.20335	9.88363	8.39397	7.73214	6.4844	39.8936
Home 78	Coaching	2022	December	2320	2620	2020	1940	1966	0.24	0.25	0.4	0.38	0.37	838	895	775	730	702	0.63	0.69	1.03	1.25	1.05	1084.74	1272.55	1606.25	1649.7	1464.52	6700	6800	6900	7105	7310	5100	5300	4890	4640	4680	13600	14100	14560	15995	16410	7.97603	9.02518	11.0319	10.3138	8.92456	49.2647
Home 79	Coaching	2022	February	2300	2520	2180	2032	1970	0.34	0.35	0.32	0.39	0.33	810	852	790	755	752	0.83	0.99	1.12	1.12	1.05	1454.3	1725.48	1582.4	1638.08	1439.7	5300	5500	5700	5950	6150	5500	6000	5400	5350	5490	12900	13500	14100	15350	15950	11.2736	12.7813	11.2227	10.6715	9.02633	41.0853
Home 80	Coaching	2022	April	3400	3750	3190	3080	3075	0.38	0.38	0.37	0.39	0.39	1290	1368	1000	1005	962	0.72	1.05	1.12	1.22	1.15	2220.8	2861.4	2300.3	2427.3	2305.55	5600	5800	6000	6100	6250	11000	11900	10500	9850	10120	12600	13100	13560	14995	15410	17.6254	21.8427	16.9639	16.1874	14.9614	44.4444
Home 81	Coaching	2022	October	2100	2150	1930	1640	1592	0.38	0.38	0.37	0.29	0.29	960	982	885	580	560	0.6	0.95	1	0.9	0.5	1374	1749.9	1599.1	997.6	741.68	5100	5200	5300	5500	5750	2800	3000	3150	3400	3540	15000	15400	15700	15750	16254	9.16	11.363	10.1854	6.33397	4.56306	34
Home 82	Coaching	2022	March	2100	2150	2000	1950	1900	0.28	0.3	0.37	0.39	0.39	802	892	745	701	688	0.8	1	1	0.9	0.9	1229.6	1537	1485	1391.4	1360.2	7800	7900	8000	8100	8300	3200	3500	3750	3800	3650	16000	17400	19700	21750	22254	7.685	8.83333	7.53807	6.39724	6.11216	48.75
Home 83	Coaching	2022	April	3300	3780	3150	3050	3000	0.3	0.4	0.4	0.34	0.32	1150	1500	1100	1030	980	0.8	1.4	1.4	1.05	1.05	1910	3612	2800	2118.5	1989	7100	7150	7250	7500	7650	2600	2780	4120	4760	4800	17800	18000	18400	18600	19800	10.7303	20.0667	15.2174	11.3898	10.0455	39.8876
Home 84	Control			3500	3620	3640	3380	3490	0.32	0.32	0.35	0.35	0.35	1001	1000	1280	1160	1056	1.3	1.3	1.39	1.39	1.35	2421.3	2458.4	3053.2	2795.4	2647.1	9240	9480	9700	9900	10110	6000	7350	8900	10300	10510	30000	32000	34000	36000	38000	8.071	7.6825	8.98	7.765	6.96605	30.8
Home 85	Control			3200	3400	3240	3360	3303	0.4	0.4	0.44	0.44	0.44	1320	1412	1200	1179	1334	0.91	0.91	1.35	1.35	1.35	2481.2	2644.92	3045.6	3070.05	3254.22	6700	6850	7000	7315	7590	5300	5900	6100	6300	6500	12900	13400	13700	15100	15760	19.2341	19.7382	22.2307	20.3315	20.6486	51.938
Home 86	Subsidy	2022/2023	April and October	2100	2150	2300	2478	2212	0.27	0.29	0.37	0.39	0.4	750	770	970	950	770	0.92	0.98	1.15	1.15	1.2	1257	1378.1	1966.5	2058.92	1808.8	5000	5105	5190	5265	5345	3100	3550	4010	4200	3800	12600	13100	15350	16895	15495	9.97619	10.5198	12.8111	12.1866	11.6734	39.6825
Home 87	Subsidy	2022/2023	April and October	3500	3720	2850	3800	3612	0.3	0.4	0.4	0.38	0.38	802	819	885	943	820	1.2	1.28	1.35	1.35	1.36	2012.4	2536.32	2334.75	2717.05	2487.76	5800	5900	6000	6000	6000	5400	5950	6450	7200	6900	25000	27000	30800	32800	33800	8.0496	9.39378	7.58036	8.28369	7.36024	23.2
Home 88	Coaching	2022	February	1900	2162	1852	1850	1800	0.25	0.31	0.36	0.36	0.32	902	1007	957	856	835	1.23	1.28	1.35	1.35	1.26	1584.46	1959.18	1958.67	1821.6	1628.1	7500	7800	8200	8500	8700	3400	3980	4010	4000	4115	17800	18000	18400	18600	19800	8.90146	10.8843	10.6449	9.79355	8.22273	42.1348
Home 89	Coaching	2022	January	3000	3300	2800	2750	2700	0.26	0.31	0.36	0.36	0.32	1450	1650	1010	900	912	0.65	0.9	1.1	1.1	0.81	1722.5	2508	2119	1980	1602.72	7900	8100	8400	8600	9000	3680	6000	5400	5250	5500	24000	26000	28650	31650	34550	7.17708	9.64615	7.39616	6.25592	4.63884	32.9167
Home 90	Subsidy	2022/2023	April and October	1600	1780	1890	2010	1620	0.29	0.39	0.42	0.43	0.41	600	740	792	795	648	1.2	1.38	1.38	1.35	1.36	1184	1715.4	1886.76	1937.55	1545.48	5000	5220	5440	5600	5780	2950	3480	3884	3950	3600	12700	13200	13560	14995	15410	9.32283	12.9955	13.9142	12.9213	10.0291	39.3701
Home 91	Subsidy	2022/2023	April and October	2700	2854	2968	2995	2850	0.32	0.32	0.32	0.33	0.33	1000	1090	1150	1290	1060	0.81	0.81	0.81	0.85	0.85	1674	1796.18	1881.26	2084.85	1841.5	5730	5850	5970	5190	5310	5500	5940	6700	6850	6700	12650	13700	16300	16855	15465	13.2332	13.1108	11.5415	12.3693	11.9075	45.2964
Home 92	Subsidy	2022/2023	April and October	3700	3750	3500	3400	3300	0.38	0.42	0.42	0.43	0.43	1300	1350	1230	1160	1100	1.09	1.09	1.34	1.34	1.38	2823	3046.5	3118.2	3016.4	2937	6800	7000	7200	7450	7780	8000	9300	13600	14840	13492	31000	31350	32954	34843	38000	9.10645	9.7177	9.46228	8.65712	7.72895	21.9355
Home 93	Subsidy	2022/2023	April and October	2900	2950	2800	2700	2650	0.3	0.3	0.4	0.4	0.4	1000	1050	950	900	860	1.25	1.25	1.3	1.3	1.3	2120	2197.5	2355	2250	2178	9100	10000	11000	12100	13400	5600	6800	6950	7220	7320	26500	27200	29900	30800	29400	8	8.07904	7.87625	7.30519	7.40816	34.3396
Home 94	Coaching	2022	January	3700	4020	3120	3028	3030	0.25	0.25	0.36	0.36	0.31	970	1230	870	888	864	0.66	0.66	0.72	0.72	0.62	1565.2	1816.8	1749.6	1729.44	1474.98	7750	7900	8250	8400	8700	6500	6900	6400	6250	6000	17000	17800	17900	18150	18500	9.20706	10.2067	9.7743	9.5286	7.97286	45.5882
Home 95	Coaching	2023	February	2900	2950	2800	2700	2650	0.23	0.28	0.34	0.36	0.34	903	963	964	800	803	1.06	1.21	1.3	1.34	1.3	1624.18	1991.23	2205.2	2044	1944.9	7400	7500	7650	7800	8000	5160	5780	5900	6012	6020	31600	32000	32800	33200	35600	5.13981	6.22259	6.72317	6.15663	5.4632	23.4177
Home 96	Coaching	2022	April	2200	2450	1920	1901	1885	0.32	0.32	0.32	0.3	0.3	540	557	450	450	435	1.27	1.27	1.3	1.4	1.32	1389.8	1491.39	1199.4	1200.3	1139.7	8844	9024	9156	9696	10548	5500	6240	6820	6730	6660	18000	18400	18700	18750	19600	7.72111	8.10538	6.4139	6.4016	5.8148	49.1333
Home 97	Subsidy	2022/2023	April and October	2300	2460	2690	2750	2685	0.14	0.14	0.32	0.32	0.36	840	890	1080	1254	848	0.72	0.74	0.72	1.36	1.36	926.8	1003	1638.4	2585.44	2119.88	5100	5260	5420	5600	5820	4100	4640	4820	5100	5350	12600	13100	15300	15900	15500	7.35556	7.65649	10.7085	16.2606	13.6766	40.4762
Home 98	Subsidy	2022/2023	April and October	4005	4212	4870	4990	4740	0.4	0.4	0.4	0.4	0.4	1540	1690	1776	1890	1762	1.4	1.4	1.4	1.45	1.45	3758	4050.8	4434.4	4736.5	4450.9	7040	7320	7540	7540	7700	7350	7840	8240	8800	8700	19500	19700	22100	23100	21800	19.2718	20.5624	20.0652	20.5043	20.417	36.1026
Home 99	Coaching	2022	March	3000	3050	2400	2200	2250	0.33	0.33	0.34	0.34	0.24	1003	1130	935	867	840	1.15	1.21	1.3	1.34	1.3	2143.45	2373.8	2031.5	1909.78	1632	7400	7500	7650	7800	8000	6860	7900	7840	7660	7450	28600	29000	30500	31200	33400	7.49458	8.18552	6.66066	6.12109	4.88623	25.8741
Home 100	Subsidy	2022/2023	April and October	1900	2044	2266	2469	2320	0.16	0.28	0.4	0.38	0.38	690	710	782	763	727	1.26	1.29	1.38	1.34	1.34	1173.4	1488.22	1985.56	1960.64	1855.78	6800	6912	7148	7306	7526	3000	3400	3900	4100	4000	15000	15400	17550	17600	16300	7.82267	9.66377	11.3137	11.14	11.3852	45.3333
Home 101	Subsidy	2022/2023	April and October	1800	1850	2010	2050	2000	0.4	0.4	0.4	0.4	0.4	642	668	706	740	675	0.72	0.72	0.95	0.95	1.35	1182.24	1220.96	1474.7	1523	1711.25	5300	5400	5500	5650	5800	2900	3400	3750	3900	3685	12600	13100	13560	14995	15410	9.38286	9.32031	10.8754	10.1567	11.1048	42.0635
Home 102	Subsidy	2022/2023	April and October	3700	3750	3500	3400	3300	0.35	0.45	0.45	0.45	0.45	1300	1350	1230	1160	1100	1.25	1.25	1.4	1.4	1.4	2920	3375	3297	3154	3025	6300	6400	6500	6700	7000	7780	8600	10000	10850	11650	30100	31200	34200	36550	37100	9.701	10.8173	9.64035	8.62927	8.15364	20.9302
Home 103	Coaching	2022	May	4000	4800	3860	3760	3670	0.29	0.32	0.39	0.38	0.36	1700	1890	1540	1290	1300	1.23	1.29	1.35	1.33	1.29	3251	3974.1	3584.4	3144.5	2998.2	8800	9000	9400	9600	10000	8200	8750	10400	9430	9350	35000	36200	38200	40000	41000	9.28857	10.9782	9.38325	7.86125	7.31268	25.1429
Home 104	Coaching	2022	April	2200	2350	1912	1950	1942	0.29	0.29	0.36	0.36	0.3	650	660	512	490	502	1.2	1.3	1.3	1.3	1.16	1418	1539.5	1353.92	1339	1164.92	8900	9300	9600	10000	10420	2550	2790	4200	4320	4412	15000	15400	15700	15750	16254	9.45333	9.99675	8.62369	8.50159	7.16697	59.3333
Home 105	Coaching	2022	February	1095	1190	1000	1030	1008	0.27	0.36	0.31	0.31	0.31	580	740	770	575	582	1.2	1.3	1.3	1.3	1.21	991.65	1390.4	1311	1066.8	1016.7	7020	7020	7020	7320	7320	3000	3250	3400	3600	3850	15600	17200	17400	17900	18000	6.35673	8.08372	7.53448	5.95978	5.64833	45
Home 106	Coaching	2022	January	3100	3320	2740	2700	2680	0.39	0.39	0.39	0.39	0.36	1000	1220	919	900	895	1.38	1.38	1.38	1.38	1.25	2589	2978.4	2336.82	2295	2083.55	7450	7650	7900	8320	8600	4900	5350	6350	6400	6420	30000	33700	35900	37900	39500	8.63	8.83798	6.50925	6.05541	5.27481	24.8333
Home 107	Coaching	2022	April	3270	3480	2860	2650	2600	0.22	0.22	0.37	0.37	0.26	1410	1509	1005	930	912	0.61	0.61	0.98	0.98	0.75	1579.5	1686.09	2043.1	1891.9	1360	8100	8500	8900	9400	10000	7300	8120	9010	9215	9100	19800	21000	22400	23600	24800	7.97727	8.029	9.12098	8.01653	5.48387	40.9091
Home 108	Subsidy	2022/2023	April and October	2100	2150	2200	2150	2000	0.17	0.21	0.27	0.31	0.37	700	790	780	810	780	0.38	0.57	0.8	0.92	1.01	623	901.8	1218	1411.7	1527.8	6100	6270	6470	6571	6571	4100	4600	5200	5150	4948	15300	15700	17800	18000	16600	4.0719	5.74395	6.8427	7.84278	9.20361	39.8693
Home 109	Coaching	2022	October	2620	2850	2520	2310	2240	0.3	0.3	0.36	0.36	0.27	1040	1192	964	840	832	0.55	0.57	1.2	1.2	0.98	1358	1534.44	2064	1839.6	1420.16	6900	7100	7300	7500	7700	2850	3320	3950	4120	4100	12600	13100	13560	14995	15410	10.7778	11.7133	15.2212	12.2681	9.21583	54.7619
Home 110	Subsidy	2022/2023	April and October	1912	1856	2004	2050	1982	0.36	0.36	0.36	0.31	0.31	630	660	680	690	675	1.28	1.28	1.28	1.34	1.34	1494.72	1512.96	1591.84	1560.1	1518.92	7500	7700	7900	8200	8500	3875	4240	4760	4690	4700	16000	16400	18500	19500	17500	9.342	9.22537	8.60454	8.00051	8.67954	46.875
Home 111	Subsidy	2022/2023	April and October	1750	1842	1930	1950	1890	0.39	0.39	0.4	0.4	0.4	540	595	614	606	626	1.35	1.35	1.4	1.4	1.4	1411.5	1521.63	1631.6	1628.4	1632.4	6600	6800	7000	7300	7500	2850	3212	3562	3650	3540	12650	13300	15400	16800	15600	11.1581	11.4408	10.5948	9.69286	10.4641	52.1739
Home 112	Subsidy	2022/2023	April and October	1950	2200	2380	2452	2450	0.4	0.4	0.4	0.4	0.4	1079	1178	1357	1430	1320	1.37	1.37	1.45	1.4	1.45	2258.23	2493.86	2919.65	2982.8	2894	5600	5700	5800	5900	6000	5000	5100	5240	5630	5200	13000	13500	15900	16900	16000	17.371	18.473	18.3626	17.6497	18.0875	43.0769
Home 113	Coaching	2022	May	3300	3688	3005	2850	2808	0.37	0.37	0.42	0.4	0.4	811	855	717	720	699	1.3	1.3	1.35	1.35	1.35	2275.3	2476.06	2230.05	2112	2066.85	8900	9300	9800	10300	10800	5100	5800	6340	6200	6010	39000	39000	45000	47000	47000	5.8341	6.34887	4.95567	4.49362	4.39755	22.8205
Home 114	Coaching	2022	March	3400	3900	3200	3000	2990	0.39	0.39	0.4	0.4	0.4	1359	1585	1075	1030	990	0.64	0.64	0.86	0.86	0.86	2195.76	2535.4	2204.5	2085.8	2047.4	9000	9200	9400	9600	10000	3800	5000	6800	6650	6500	17600	18200	18660	18905	19210	12.4759	13.9308	11.814	11.0331	10.658	51.1364
Home 115	Coaching	2023	January	4000	4130	4360	3900	3636	0.19	0.21	0.27	0.29	0.24	1490	1732	1690	1334	1240	0.56	0.67	0.87	0.92	0.89	1594.4	2027.74	2647.5	2358.28	1976.24	8700	8800	8950	9100	9300	5900	7360	8140	8280	8140	31500	31900	32700	33100	35500	5.06159	6.35655	8.09633	7.12471	5.56687	27.619
Home 116	Coaching	2022	January	1550	1648	1650	1620	1638	0.18	0.18	0.36	0.36	0.32	480	572	518	522	530	0.71	0.71	1.32	1.32	1.2	619.8	702.76	1277.76	1272.24	1160.16	6590	6720	6880	7010	7290	1850	1745	2010	2300	2430	12600	13100	13560	14995	15410	4.91905	5.36458	9.42301	8.48443	7.52862	52.3016
Home 117	Coaching	2022	April	3620	3640	2640	2300	2430	0.23	0.23	0.39	0.39	0.32	1520	1750	1415	1195	1138	0.79	0.79	1.35	1.35	0.92	2033.4	2219.7	2939.85	2510.25	1824.56	9300	9800	10200	10700	11200	7690	9480	11640	12330	12800	23800	25400	25900	26420	27950	8.5437	8.73898	11.3508	9.50132	6.52794	39.0756
Home 118	Coaching	2022	April	3640	3740	3004	2680	2640	0.3	0.3	0.35	0.35	0.19	1280	1410	1002	810	775	1.1	1.1	1.3	1.3	0.74	2500	2673	2354	1991	1075.1	7140	7500	7800	8100	8400	5400	5900	7800	8100	8000	17800	18000	18400	18600	19800	14.0449	14.85	12.7935	10.7043	5.4298	40.1124
Home 119	Coaching	2023	January	2210	2230	2400	2550	2320	0.29	0.29	0.34	0.34	0.3	720	780	700	730	690	1.29	1.32	1.4	1.4	1.4	1569.7	1676.3	1796	1889	1662	6600	6900	7300	7500	7800	4300	4700	4940	5222	5300	31600	32000	32800	28200	30600	4.96741	5.23844	5.47561	6.69858	5.43137	20.8861
Home 120	Coaching	2022	April	2000	2400	1942	1945	1912	0.26	0.26	0.4	0.4	0.4	750	809	980	778	720	1.4	1.4	1.3	1.3	1.09	1570	1756.6	2050.8	1789.4	1549.6	7800	7900	8000	8100	8200	2900	2850	5100	5000	4980	17800	18000	18400	18600	19800	8.82022	9.75889	11.1457	9.62043	7.82626	43.8202
Home 121	Renovation	2023	January	2009	1990	1927	2066	1885	0.26	0.26	0.26	0.26	0.26	1528	1426	1425	354	349	1.35	1.35	1.4	1.4	1.23	2585.14	2442.5	2496.02	1032.76	919.37	6120	6370	6560	6700	7000	2000	2340	2560	4450	4400	12600	13100	13560	14995	15410	20.517	18.645	18.4072	6.88736	5.96606	48.5714
Home 122	Control			2700	2860	2912	2998	3000	0.33	0.33	0.38	0.38	0.35	942	1020	1050	1100	1060	1.25	1.25	1.35	1.35	1.35	2068.5	2218.8	2524.06	2624.24	2481	7700	7900	8300	8600	9000	4300	4800	5600	7100	7500	30600	31000	31800	32200	33600	6.7598	7.15742	7.9373	8.14981	7.38393	25.1634
Home 123	Coaching	2022	April	1892	1620	1400	1430	1326	0.36	0.36	0.36	0.36	0.36	1340	1150	830	819	829	1.22	1.22	1.22	1.22	1.22	2315.92	1986.2	1516.6	1513.98	1488.74	8000	8400	8800	9250	9750	6400	6620	7520	8230	8100	28500	35000	33000	35000	36500	8.12604	5.67486	4.59576	4.32566	4.07874	28.0702
Home 124	Control			2100	2250	2350	2950	2900	0.13	0.1493	0.3197	0.48	0.2695	750	770	980	1050	920	0.63	0.69	1.03	1.45	1.4	745.5	867.225	1760.69	2938.5	2069.55	8808	9124	9356	9796	11560	3600	3780	4200	4620	4342	12600	13100	13560	14990	15410	5.91667	6.62004	12.9845	19.6031	13.4299	69.9048
Home 125	Control			2400	2850	2900	3350	3500	0.23	0.1993	0.4197	0.4795	0.55	813	810	1120	1350	1245	0.753	0.99	1.33	1.44	1.45	1164.19	1369.9	2706.73	3550.32	3730.25	7640	7860	8360	8624	9080	4200	4080	4680	5160	5440	13800	14100	14460	14940	15480	8.43615	9.71564	18.7187	23.7639	24.0972	55.3623
Home 126	Control			2323	2649	2750	3510	3600	0.29	0.34	0.4	0.57	0.59	713	780	1215	1373	1319	0.79	1.2	2.4	1.55	1.45	1236.94	1836.66	4016	4128.85	4036.55	7640	7880	8360	8624	9080	3500	3640	4400	3590	5012	17800	18000	18400	18600	19300	6.9491	10.2037	21.8261	22.1981	20.9148	42.9213
Home 127	Control			2520	3090	3001	3710	3899	0.3	0.47	0.594	0.97	0.92	603	702	996	1179	1021	0.49	0.89	1.23	1.45	1.45	1051.47	2077.08	3007.67	5308.25	5067.53	7800	8100	8400	8825	9250	3020	3290	3450	3600	4105	15000	15400	15700	15750	16250	7.0098	13.4875	19.1572	33.7032	31.1848	52
Home 128	Control			1900	2200	2251	2930	2797	0.15	0.4	0.4	0.49	0.39	412	500	829	876	780	0.52	0.92	0.95	1.05	0.9	499.24	1340	1687.95	2355.5	1792.83	5700	5940	6200	6500	6900	3700	4200	3600	4700	5100	13800	14100	14460	14940	15220	3.61768	9.50355	11.6732	15.7664	11.7794	41.3043
Home 129	Control			2900	3150	2800	3200	3150	0.14	0.16	0.33	0.39	0.29	1000	1050	1150	1300	1160	0.53	0.59	0.83	1.33	1.21	936	1123.5	1878.5	2977	2317.1	9000	9200	9500	9900	9400	5660	6060	6780	7500	8080	19800	20400	20900	21420	21950	4.72727	5.50735	8.98804	13.8982	10.5563	45.4545
Home 130	Control			3300	3646	3720	4300	4330	0.36	0.4	0.56	0.62	0.65	1398	1530	1800	1849	1700	0.72	0.89	0.89	1.49	1.49	2194.56	2820.1	3685.2	5421.01	5347.5	8750	9000	9250	9550	10100	7200	8400	9020	9940	9280	18000	18800	19300	19400	20900	12.192	15.0005	19.0943	27.9434	25.5861	48.6111
Home 131	Control			3190	3613	3609	4117	4120	0.42	0.45	0.5	0.6	0.65	912	996	1320	1354	1209	0.95	1.09	1.49	1.49	1.49	2206.2	2711.49	3771.3	4487.66	4479.41	8600	8800	9000	9200	9500	6605	7205	7620	7600	7920	31100	31500	32300	31700	33200	7.09389	8.6079	11.6759	14.1567	13.4922	27.6527
Home 132	Control			2530	2895	2844	3470	3469	0.43	0.43	0.43	0.55	0.55	603	678	1020	1184	1119	0.75	0.75	0.75	1.45	1.35	1540.15	1753.35	1987.92	3625.3	3418.6	7360	7600	7900	8200	8500	5500	5800	6450	6600	6655	19400	19500	20000	20900	21400	7.93892	8.99154	9.9396	17.3459	15.9748	37.9381
Home 133	Control			3200	3712	3754	4330	4483	0.53	0.57	0.52	0.55	0.55	1142	1287	1650	1754	1699	0.66	0.95	1.39	1.49	1.49	2449.72	3338.49	4245.58	4994.96	4997.16	8399	8589	8800	9110	9547	6900	7524	7900	8149	8395	31190	32500	33500	34300	35300	7.85418	10.2723	12.6734	14.5626	14.1563	26.9285
Home 134	Control			3300	3550	3650	4150	4100	0.52	0.52	0.52	0.55	0.55	1150	1200	1300	1430	1280	0.86	0.86	0.86	1.41	1.42	2705	2878	3016	4298.8	4072.6	9000	9220	9410	9690	1000	6900	8520	8560	9060	9020	31200	32200	33400	34000	35200	8.66987	8.93789	9.02994	12.6435	11.5699	28.8462
Home 135	Control			3410	3830	3946	4582	4510	0.44	0.44	0.45	0.55	0.55	1390	1300	1752	1700	1680	0.93	0.93	1.5	1.6	1.6	2793.1	2894.2	4403.7	5240.1	5168.5	8000	8310	8640	8850	9100	7380	8030	8193	8630	8950	19600	19800	21000	22600	23000	14.2505	14.6172	20.97	23.1863	22.4717	40.8163
Home 136	Control			3410	3530	3656	4082	4140	0.27	0.32	0.38	0.61	0.58	1275	1450	1924	1817	1709	1.03	1.08	1.32	1.49	1.53	2233.95	2695.6	3928.96	5197.35	5015.97	8100	8530	8780	8960	9212	7030	7595	7829	8590	8900	29500	30500	31500	33500	35000	7.57271	8.83803	12.4729	15.5145	14.3313	27.4576
Home 137	Control			3700	3950	4000	4900	4800	0.35	0.35	0.45	0.55	0.55	1300	1350	1530	1560	1600	1.1	1.1	1.43	1.52	1.52	2725	2867.5	3987.9	5066.2	5072	9000	9350	9620	9950	10290	7920	8400	9420	9640	9088	31200	31700	33800	34500	35500	8.73397	9.04574	11.7985	14.6846	14.2873	28.8462
Home 138	Control			3905	4250	4299	4600	4520	0.4	0.4	0.4	0.48	0.48	1490	1632	1930	2960	2795	1.4	1.4	1.4	1.64	1.64	3648	3984.8	4421.6	7062.4	6753.4	9043	9320	9545	9545	9600	8200	9000	9650	10610	10800	19500	19700	20300	21300	21800	18.7077	20.2274	21.7813	33.1568	30.9789	46.3744
Home 139	Control			4012	4620	4615	5200	5388	0.41	0.42	0.43	0.54	0.55	1586	1666	2100	2210	2096	1.4	1.41	1.42	1.52	1.54	3865.32	4289.46	4966.45	6167.2	6191.24	8650	9050	9450	9850	10250	8550	9400	10700	10835	11340	30080	31090	32470	34750	36100	12.8501	13.7969	15.2955	17.7473	17.1502	28.7566
Home 140	Control			4400	4825	5000	5750	5611	0.35	0.35	0.35	0.47	0.47	1650	1770	2301	2414	2245	1.4	1.45	1.45	1.5	1.5	3850	4255.25	5086.45	6323.5	6004.67	8790	9000	9200	9450	9750	8750	9600	11200	12050	11980	31200	32700	33800	34500	35500	12.3397	13.013	15.0487	18.329	16.9146	28.1731
Home 141	Control			4200	5360	5735	4889	5940	0.42	0.42	0.42	0.51	0.51	1890	2300	2957	2894	2812	1.4	1.4	1.39	1.59	1.59	4410	5471.2	6518.93	7094.85	7500.48	8800	912	9204	9420	9660	9750	11830	12000	12500	11870	30500	30850	32254	34343	35700	14.459	17.7348	20.2112	20.6588	21.0097	28.8525
Home 142	Control			5100	5100	5500	5990	5910	0.45	0.45	0.45	0.55	0.55	2009	2100	2289	2397	2780	1.45	1.45	1.45	1.55	1.55	5208.05	5340	5794.05	7009.85	7559.5	7000	7192	7296	7502	7710	7100	7900	8800	9930	10870	19620	19818	20388	21418	22068	26.5446	26.9452	28.4189	32.7288	34.2555	35.6779
Home 143	Control			2300	2479	2780	3332	3482	0.4	0.4	0.4	0.55	0.55	720	801	992	1074	995	1.4	1.4	1.4	1.4	1.4	1928	2113	2500.8	3336.2	3308.1	7590	7680	7780	7850	8100	3100	3323	3580	3245	3450	13800	14100	14460	14940	15480	13.971	14.9858	17.2946	22.3307	21.3702	55
Home 144	Subsidy	2022/2023	April and October	2200	2250	2400	2650	1900	0.23	0.25	0.4	0.4	0.4	860	790	1080	1050	720	0.73	0.79	1.43	1.45	1.45	1133.8	1186.6	2504.4	2582.5	1804	8902	9032	9124	9342	9468	3100	3280	5500	5620	3448	12700	13200	15360	16700	15510	8.92756	8.98939	16.3047	15.4641	11.6312	70.0945
Home 145	Subsidy	2022/2023	April and October	2400	2650	3450	3610	2800	0.22	0.21	0.48	0.47	0.38	804	799	1112	1450	835	0.76	1	1.45	1.44	1.44	1139.04	1355.5	3268.4	3784.7	2266.4	7240	7480	7960	8242	8608	3150	3430	6316	6115	4387	13800	14100	16200	16800	15480	8.25391	9.61348	20.1753	22.528	14.6408	52.4638
Home 146	Subsidy	2022/2023	April and October	2457	2560	3350	3622	2880	0.31	0.36	0.49	0.52	0.4	718	796	1205	1357	756	0.75	1.25	1.45	1.45	1.45	1300.17	1916.6	3388.75	3851.09	2248.2	7040	7280	7950	8220	8640	2750	3040	5600	5690	3520	17800	18000	20200	20400	19800	7.30433	10.6478	16.776	18.8779	11.3545	39.5506
Home 147	Subsidy	2022/2023	April and October	2320	2780	3791	3810	2856	0.34	0.4	0.5	0.55	0.4	583	682	975	1079	530	0.69	1.09	1.39	1.35	1.35	1191.07	1855.38	3250.75	3552.15	1857.9	7200	7300	7500	7700	7900	2212	2540	4850	4700	2700	16000	16400	18500	18750	17260	7.44419	11.3133	17.5716	18.9448	10.7642	45
Home 148	Subsidy	2022/2023	April and October	2000	2100	3200	3430	2022	0.18	0.37	0.5	0.59	0.39	402	436	809	916	380	0.57	0.99	1.45	1.15	1.2	589.14	1208.64	2773.05	3077.1	1244.58	5200	5460	5500	5640	5800	2900	3400	6100	6000	3850	13800	14100	16300	16700	15220	4.26913	8.57191	17.0126	18.4257	8.17727	37.6812
Home 149	Subsidy	2022/2023	April and October	2905	2950	3730	3900	2600	0.18	0.2	0.5	0.53	0.35	1005	1555	1975	2080	860	0.55	0.61	1.55	1.09	1.15	1075.65	1538.55	4926.25	4334.2	1899	8900	9100	9400	9600	10000	5050	5660	8780	8500	6080	19800	20400	22700	23200	21950	5.43258	7.54191	21.7015	18.6819	8.65148	44.9495
Home 150	Subsidy	2022/2023	April and October	3400	3556	4340	4400	3130	0.36	0.45	0.55	0.55	0.38	1498	1630	2000	2179	1280	0.75	0.93	1.63	1.4	1.4	2347.5	3116.1	5647	5470.6	2981.4	8650	8800	9000	9230	9510	6500	7900	10300	10850	9290	18000	18800	21100	21400	20900	13.0417	16.575	26.763	25.5636	14.2651	48.0556
Home 151	Subsidy	2022/2023	April and October	3150	3420	4308	3517	3320	0.41	0.41	0.5	0.46	0.4	902	990	1500	1554	803	0.97	1.12	1.5	1.4	1.4	2166.44	2511	4404	3793.42	2452.2	8600	8700	8900	9000	9100	6000	6600	9150	8950	6650	32000	32400	35000	35800	35600	6.77013	7.75	12.5829	10.5961	6.8882	26.875
Home 152	Subsidy	2022/2023	April and October	2520	2676	3530	3800	2602	0.35	0.35	0.55	0.5	0.4	519	660	1020	1184	492	0.79	0.79	1.39	1.07	1.07	1292.01	1458	3359.3	3166.88	1567.24	7000	7200	7500	7800	8100	5000	5300	7900	7700	5750	19400	19500	21800	22700	21400	6.65985	7.47692	15.4096	13.951	7.32355	36.0825
Home 153	Subsidy	2022/2023	April and October	3250	3572	4509	4630	3460	0.43	0.43	0.52	0.53	0.42	1122	1240	1850	1956	1104	0.72	0.98	1.6	1.4	1.4	2205.34	2751.16	5304.68	5192.3	2998.8	7995	8295	8495	8695	8895	6200	6840	8550	9290	6840	31690	33000	36200	36600	35800	6.9591	8.33685	14.6538	14.1866	8.37654	25.2288
Home 154	Subsidy	2022/2023	April and October	3500	3550	4150	5250	2860	0.32	0.32	0.52	0.6	0.4	1050	1150	1750	1830	870	0.88	0.88	1.48	1.3	1.3	2044	2148	4748	5529	2275	8200	8520	8805	9380	9600	6305	7940	9790	9900	7200	31900	32700	35700	36300	36780	6.40752	6.56881	13.2997	15.2314	6.18543	25.7053
Home 155	Subsidy	2022/2023	April and October	3400	3500	4100	4300	3300	0.34	0.34	0.55	0.55	0.35	1360	1370	1879	2200	1382	0.95	0.95	1.6	1.3	1.3	2448	2491.5	5261.4	5225	2951.6	7500	7710	8140	8350	8600	6700	7500	9700	9600	7650	19600	19800	22800	24400	23000	12.4898	12.5833	23.0763	21.4139	12.833	38.2653
Home 156	Subsidy	2022/2023	April and October	3400	3550	4400	4593	3450	0.29	0.35	0.5	0.52	0.38	1190	1430	2100	2218	1209	1.06	1.12	1.68	1.45	1.45	2247.4	2844.1	5728	5604.46	3064.05	7900	8100	8400	8600	8800	6450	6995	9150	9350	7620	30000	32000	34800	36800	36000	7.49133	8.88781	16.4598	15.2295	8.51125	26.3333
Home 157	Subsidy	2022/2023	April and October	2000	2090	3400	3700	2300	0.25	0.25	0.55	0.55	0.35	945	950	1400	1580	1005	1.32	1.32	1.45	1.4	1.4	1747.4	1776.5	3900	4247	2212	7700	8020	8650	8890	8000	6520	7000	8920	8920	7540	31300	33000	35900	36600	34800	5.58275	5.38333	10.8635	11.6038	6.35632	24.6006
Home 158	Subsidy	2022/2023	April and October	3855	3955	4800	5300	3820	0.3	0.3	0.55	0.58	0.28	1350	1322	2140	2260	1192	1.3	1.4	1.55	1.34	1.34	2911.5	3037.3	5957	6102.4	2666.88	9100	9300	9500	9600	9800	7820	8640	11920	14800	10000	19500	19700	23100	23300	21800	14.9308	15.4178	25.7879	26.1906	12.2334	46.6667
Home 159	Subsidy	2022/2023	April and October	4002	4422	5105	5300	4330	0.31	0.32	0.53	0.55	0.35	1686	1777	2200	2310	1590	1.4	1.41	1.62	1.43	1.44	3601.02	3920.61	6269.65	6218.3	3805.1	8750	9860	9130	9550	9870	8190	8900	11700	11900	9450	29950	30700	34270	32870	31400	12.0234	12.7707	18.2949	18.9179	12.1182	29.2154
Home 160	Subsidy	2022/2023	April and October	4200	4455	5300	5560	4320	0.37	0.37	0.6	0.65	0.29	1550	1670	2304	2415	1755	1.4	1.45	1.65	1.4	1.4	3724	4069.85	6981.6	6995	3709.8	8890	9000	9180	9420	9670	8200	9100	12700	13200	10100	31700	33200	36100	36800	36000	11.7476	12.2586	19.3396	19.0082	10.305	28.0442
Home 161	Subsidy	2022/2023	April and October	4205	5165	6235	6389	4540	0.32	0.32	0.63	0.68	0.38	1900	2390	3296	3397	2208	1.39	1.39	1.79	1.39	1.39	3986.6	4974.9	9827.89	9066.35	4794.32	7800	7910	8120	8340	8560	9050	11400	13800	13930	10070	31000	31350	34800	36600	38000	12.86	15.8689	28.2411	24.7714	12.6166	25.1613
Home 162	Subsidy	2022/2023	April and October	5000	4800	5700	5900	4660	0.35	0.35	0.63	0.66	0.35	1999	2009	2389	2590	1770	1.4	1.4	1.69	1.4	1.4	4548.6	4492.6	7628.41	7520	4109	6500	6700	6800	7000	7200	6600	6900	9600	9450	6480	19620	19818	22100	22900	22068	23.1835	22.6693	34.5177	32.8384	18.6197	33.1295
Home 163	Subsidy	2022/2023	April and October	2250	2229	2855	3190	2092	0.4	0.4	0.4	0.46	0.35	730	811	1023	1294	735	1.4	1.4	1.45	1.4	1.4	1922	2027	2625.35	3279	1761.2	6500	6600	6700	6800	6950	2400	2700	4800	5100	2940	14000	14300	16500	17100	15480	13.7286	14.1748	15.9112	19.1754	11.3773	46.4286
Home 164	Coaching	2022	January	1650	17800	1500	1490	1490	0.21	0.21	0.22	0.22	0.19	523	479	515	400	390	0.66	0.66	0.66	0.66	0.56	691.68	4054.14	669.9	591.8	501.5	8800	8900	9050	9300	9550	3400	3800	5200	5900	5930	14000	16000	18000	20000	22000	4.94057	25.3384	3.72167	2.959	2.27955	62.8571
Home 165	Coaching	2022	January	1996	2025	1945	1912	1892	0.32	0.32	0.37	0.37	0.31	1000	1099	842	820	792	0.82	0.82	0.84	0.84	0.7	1458.72	1549.18	1426.93	1396.24	1140.92	7250	7450	7650	7950	8250	4000	4800	5765	6112	6300	13800	14100	16200	16800	15480	10.5704	10.9871	8.80821	8.31095	7.37028	52.5362
Home 166	Coaching	2022	February	2500	2662	2330	2012	1992	0.37	0.37	0.4	0.42	0.4	770	802	640	577	530	1.32	1.32	1.32	1.25	1.25	1941.4	2043.58	1776.8	1566.29	1459.3	6800	7100	7400	7700	8000	2400	2650	4055	4829	4670	17800	18000	20200	20400	19800	10.9067	11.3532	8.79604	7.67789	7.3702	38.2022
Home 167	Coaching	2022	February	1956	2300	2000	1854	1802	0.35	0.37	0.4	0.4	0.4	712	745	675	603	590	1.09	1.09	1.09	1.09	1.09	1460.68	1663.05	1535.75	1398.87	1363.9	7500	7800	8140	8480	8800	2210	3350	4000	4970	4922	15000	16400	18500	18750	17260	9.73787	10.1405	8.30135	7.46064	7.90209	50
Home 168	Coaching	2022	March	2000	2900	2300	1850	1726	0.35	0.36	0.36	0.36	0.36	702	736	609	566	490	1.15	1.15	1.15	1.15	1.15	1507.3	1890.4	1528.35	1316.9	1184.86	5300	5550	5740	6060	6270	2912	3392	4960	5500	5540	13800	14100	16300	16700	15220	10.9225	13.4071	9.37638	7.88563	7.78489	38.4058
Home 169	Coaching	2022	March	2880	3010	2870	2779	2740	0.28	0.28	0.37	0.37	0.35	1100	1300	930	880	860	0.85	0.85	0.85	0.85	0.85	1741.4	1947.8	1852.4	1776.23	1690	9100	9500	9700	10000	10200	5040	5560	7290	7800	7850	19800	20400	22700	23200	21950	8.79495	9.54804	8.16035	7.65616	7.69932	45.9596
Home 170	Coaching	2022	April	3100	3300	2760	2700	2620	0.35	0.35	0.35	0.35	0.35	1610	1650	1602	1442	1390	1.15	1.2	1.3	1.3	1.3	2936.5	3135	3048.6	2819.6	2724	8680	8840	9160	9460	9680	6140	7240	8800	9325	9490	19000	19900	21900	22900	24900	15.4553	15.7538	13.9205	12.3127	10.9398	45.6842
Home 171	Coaching	2022	April	3430	3480	2987	2917	2869	0.37	0.37	0.4	0.4	0.4	1006	1005	965	952	903	1.4	1.4	1.4	1.4	1.4	2677.5	2694.6	2545.8	2499.6	2411.8	8300	8400	8600	8700	8800	5400	6500	8010	8440	8420	30400	30400	33000	33400	36900	8.80757	8.86382	7.71455	7.48383	6.53604	27.3026
Home 172	Coaching	2022	April	2510	2655	2090	2100	102	0.37	0.37	0.38	0.38	0.38	600	620	530	489	492	0.88	0.88	0.89	0.89	0.89	1456.7	1527.95	1265.9	1233.21	476.64	6900	7100	7500	7700	8100	5300	5700	7020	7400	7400	19400	20900	21800	22700	23600	7.50876	7.31077	5.80688	5.43264	2.01966	35.567
Home 173	Coaching	2022	April	3600	3780	2912	2930	2960	0.4	0.4	0.4	0.38	0.38	1420	1490	1100	1055	1008	1.25	1.25	1.3	1.3	1.3	3215	3374.5	2594.8	2484.9	2435.2	8155	8555	8855	9255	9655	4000	4740	6100	6800	6840	31690	33000	35200	37400	39500	10.1452	10.2258	7.37159	6.64412	6.16506	25.7337
Home 174	Coaching	2023	January	3150	3300	3356	2890	2900	0.34	0.34	0.34	0.39	0.39	1090	1120	1420	900	866	1.2	1.2	1.2	1.32	1.23	2379	2466	2845.04	2315.1	2196.18	7800	8230	8660	9090	9420	6010	8450	8720	8900	9200	31900	32700	33700	34300	36780	7.45768	7.54128	8.44226	6.74956	5.97113	24.4514
Home 175	Coaching	2023	January	2400	2490	2442	1980	1975	0.33	0.33	0.34	0.34	0.34	987	1004	1049	800	760	1.09	1.1	1.1	1.27	1.27	1867.83	1926.1	1984.18	1689.2	1636.7	7500	7730	8030	8350	8600	4100	4500	6250	7400	7490	19600	19800	20800	22400	23000	9.52974	9.72778	9.53933	7.54107	7.11609	38.2653
Home 176	Coaching	2023	January	3390	3520	3600	2890	2860	0.34	0.34	0.39	0.38	0.38	1212	1314	1340	970	909	1.19	1.2	1.28	1.35	1.35	2594.88	2773.6	3119.2	2407.7	2313.95	7800	8000	8300	8500	8700	6500	7000	8200	8990	8950	30000	32000	33800	35800	36700	8.6496	8.6675	9.2284	6.72542	6.30504	26
Home 177	Coaching	2022	February	1700	1890	1400	1420	1418	0.38	0.38	0.42	0.42	0.42	812	840	610	617	606	1.32	1.32	1.32	1.32	1.32	1717.84	1827	1393.2	1410.84	1395.48	7450	7800	8150	8500	8850	6600	7000	8400	10200	10560	31300	33000	35900	36600	37800	5.48831	5.53636	3.88078	3.85475	3.69175	23.8019
Home 178	Coaching	2022	February	3712	3905	3210	3070	2960	0.33	0.33	0.33	0.37	0.37	1450	1492	1040	952	892	1.3	1.3	1.3	1.34	1.34	3109.96	3228.25	2411.3	2411.58	2290.48	8800	9050	9300	9550	9800	6300	6660	9820	11500	12000	19500	20700	21900	23300	24800	15.9485	15.5954	11.0105	10.3501	9.23581	45.1282
Home 179	Coaching	2022	February	3900	4030	1604	1407	1480	0.34	0.34	0.36	0.36	0.35	1710	1762	1109	1190	1052	1.28	1.28	1.32	1.32	1.32	3514.8	3625.56	2041.32	2077.32	1906.64	8800	9200	9600	10000	10400	8000	8005	10100	11600	11800	30500	30900	31400	31900	32400	11.5239	11.7332	6.50102	6.51197	5.88469	28.8525
Home 180	Coaching	2022	March	4400	4445	3800	3720	3480	0.35	0.35	0.35	0.3	0.3	1602	1671	1209	918	965	1.25	1.25	1.25	1.2	1.2	3542.5	3644.5	2841.25	2217.6	2202	8600	8700	8800	9000	9250	8040	8050	10300	12200	12400	31700	33500	34300	35100	35900	11.1751	10.8791	8.28353	6.31795	6.1337	27.1293
Home 181	Coaching	2022	April	4306	4466	3762	3729	3650	0.3	0.3	0.3	0.36	0.36	1910	1945	1812	1815	1776	1.19	1.19	1.19	1.19	1.19	3564.7	3654.35	3284.88	3502.29	3427.44	7400	7600	7800	8010	8230	8660	9200	11720	12500	12650	31600	31900	32600	33400	36000	11.2807	11.4556	10.0763	10.4859	9.52067	23.4177
Home 182	Coaching	2022	April	4900	5000	4130	3812	3800	0.36	0.36	0.33	0.33	0.33	2100	2130	1430	1380	1335	1.2	1.2	1.2	1.2	1.1	4284	4356	3078.9	2913.96	2722.5	6300	6500	6600	6800	7000	4200	4500	8300	9750	9910	20400	20800	22000	22800	23600	21	20.9423	13.995	12.7805	11.536	30.8824
Home 183	Coaching	2022	April	3920	4230	3700	2850	2890	0.37	0.37	0.37	0.37	0.36	1250	1430	908	900	887	1.26	1.26	1.28	1.28	1.28	3025.4	3366.9	2531.24	2206.5	2175.76	7500	7800	8100	8400	8850	4000	6300	7600	8200	8490	31600	32000	32800	33200	35600	9.57405	10.5216	7.7172	6.64608	6.11169	23.7342
Home 184	Renovation	2022	January	1750	1982	2390	2200	2145	0.19	0.19	0.23	0.23	0.23	801	852	594	570	530	0.76	0.76	0.79	0.79	0.79	941.26	1024.1	1018.96	956.3	912.05	6850	7000	7500	8000	8500	2700	3120	4200	4010	4000	13600	14100	14560	15996	16410	6.92103	7.26312	6.99835	5.97837	5.55789	50.3676
Home 185	Renovation	2022	January	2000	2440	2935	2790	2740	0.23	0.23	0.27	0.27	0.27	1005	1320	842	812	790	0.75	0.79	0.82	0.82	0.76	1213.75	1604	1482.89	1419.14	1340.2	8120	8320	8820	9420	9520	1900	2300	3600	3800	4150	14700	15200	16660	17195	17510	8.2568	10.5526	8.9009	8.25321	7.65391	55.2381
Home 186	Renovation	2022	January	1520	1849	2290	2140	2100	0.35	0.35	0.4	0.4	0.4	812	904	510	512	488	1.22	1.22	1.31	1.31	1.27	1522.64	1750.03	1584.1	1526.72	1459.76	7300	7500	8000	8500	9000	2800	3100	3200	3630	3840	18800	19000	19400	19600	20800	8.09915	9.21068	8.16546	7.78939	7.01808	38.8298
Home 187	Renovation	2022	January	2020	2540	2962	2790	2812	0.29	0.38	0.38	0.38	0.35	952	1114	802	762	710	0.74	0.92	0.92	0.92	0.86	1290.28	1990.08	1863.4	1761.24	1594.8	6950	7100	7600	8100	8300	3600	4002	4300	4618	4270	17000	17400	17700	17759	18500	7.58988	11.4372	10.5277	9.91745	8.62054	40.8824
Home 188	Renovation	2022	January	1750	2030	2710	2488	2414	0.32	0.32	0.4	0.4	0.39	815	915	520	535	505	1.2	1.2	1.32	1.33	1.21	1538	1747.6	1770.4	1706.75	1552.51	6320	6420	6720	7020	7320	3500	4000	4500	4700	4800	18800	19000	19400	19600	20800	8.18085	9.19789	9.12577	8.70791	7.46399	33.617
Home 189	Renovation	2022	February	2250	2540	1950	1700	1632	0.25	0.25	0.27	0.27	0.21	1820	1740	939	946	913	0.75	0.75	0.77	0.77	0.74	1927.5	1940	1249.53	1187.42	1018.34	6500	6650	6800	7000	7220	2500	2995	3000	3110	3009	13600	14100	14560	15995	16410	14.1728	13.7589	8.58194	7.42369	6.20561	47.7941
Home 190	Renovation	2022	February	2800	3180	2400	2210	2050	0.22	0.24	0.24	0.22	0.22	1190	1140	740	700	695	0.73	0.75	0.75	0.71	0.71	1484.7	1618.2	1131	983.2	944.45	7000	7220	7520	7840	8260	4100	4640	5110	5509	5600	19000	19800	20300	20400	21198	7.81421	8.17273	5.57143	4.81961	4.45537	36.8421
Home 191	Renovation	2022	February	2740	3320	2830	2582	2512	0.33	0.36	0.37	0.35	0.33	1000	1230	840	842	775	1.23	1.29	1.32	1.25	1.23	2134.2	2781.9	2155.9	1956.2	1782.21	8100	8400	8800	9250	9750	5000	5440	5700	5810	5830	32600	33000	33800	34200	36600	6.54663	8.43	6.3784	5.71988	4.86943	24.8466
Home 192	Renovation	2022	February	2430	2880	2112	1980	1930	0.24	0.24	0.26	0.26	0.26	1340	1430	850	730	712	0.7	0.7	0.74	0.74	0.74	1521.2	1692.2	1178.12	1055	1028.68	7400	7700	8200	8600	9100	4605	4554	5490	6430	6540	20800	21400	21900	22420	22950	7.31346	7.90748	5.37954	4.70562	4.48227	35.5769
Home 193	Renovation	2022	April	3200	3750	3050	2700	2710	0.28	0.28	0.32	0.32	0.32	1600	1800	1100	930	880	1.02	1.01	1.11	1.1	1.08	2528	2868	2197	1887	1817.6	8000	8400	9000	9600	10100	5300	6000	7500	8400	9200	32600	33000	33800	34200	36600	7.7546	8.69091	6.5	5.51754	4.96612	24.5399
Home 194	Renovation	2022	April	3500	3950	3200	2800	2740	0.32	0.32	0.34	0.34	0.32	1700	1890	1030	960	900	1.3	1.3	1.34	1.25	1.25	3330	3721	2468.2	2152	2001.8	6700	7000	7500	8000	8600	6800	7630	8700	8740	9500	33200	34300	36000	38000	41000	10.0301	10.8484	6.85611	5.66316	4.88244	20.1807
Home 195	Renovation	2022	April	3800	4228	3800	3420	3450	0.37	0.37	0.4	0.37	0.35	2010	2056	1009	990	940	1.23	1.23	1.3	1.24	1.24	3878.3	4093.24	2831.7	2493	2373.1	6000	6320	6800	6280	6760	7112	8800	9920	9900	9630	20800	21400	21900	22420	22950	18.6457	19.1273	12.9301	11.1195	10.3403	28.8462
Home 196	Renovation	2022	April	3520	3990	2800	2350	2340	0.35	0.35	0.37	0.36	0.35	2000	2210	1320	964	930	1.19	1.19	1.24	1.24	1.18	3612	4026.4	2672.8	2041.36	1916.4	6400	6800	7400	8000	8600	7300	8120	8700	9220	9300	32600	33000	33800	34200	36600	11.0798	12.2012	7.90769	5.96889	5.23607	19.6319
Home 197	Renovation	2022	April	2750	3214	2300	1919	1912	0.34	0.34	0.39	0.39	0.32	1800	1998	1040	920	880	1.15	1.18	1.25	1.19	1.17	3005	3450.4	2197	1843.21	1641.44	5800	6010	6520	7040	7600	5900	6540	7300	7400	7700	33500	33900	34700	35100	37300	8.97015	10.1782	6.33141	5.25131	4.40064	17.3134
Home 198	Renovation	2022	April	2802	3285	2840	2590	2612	0.27	0.27	0.32	0.32	0.3	2300	2308	1620	1005	1090	1.29	1.29	1.3	1.32	1.19	3723.54	3864.27	3014.8	2155.4	2080.7	5550	5650	5950	5250	5500	5000	6000	7500	7700	7800	20800	21400	21900	22420	22950	17.9016	18.0573	13.7662	9.61374	9.06623	26.6827
Home 199	Renovation	2022	April	2650	3040	2620	1800	1812	0.25	0.25	0.28	0.28	0.24	2004	2025	1776	1412	1296	1.21	1.23	1.26	1.26	1.23	3087.34	3250.75	2971.36	2283.12	2028.96	7490	7700	8010	8420	8730	4400	4590	5780	6100	6300	22600	23400	23900	24480	25780	13.6608	13.8921	12.4325	9.32647	7.87029	33.1416
Home 200	Renovation	2022	May	2890	3180	2570	2300	2280	0.29	0.29	0.34	0.34	0.32	2600	2740	1800	1420	1350	1.3	1.3	1.36	1.35	1.32	4218.1	4484.2	3321.8	2699	2511.6	8200	8300	8400	8500	8610	6500	6912	7500	7700	7740	31850	32250	33050	33450	35850	13.2436	13.9045	10.0508	8.06876	7.00586	25.7457
Home 201	Renovation	2023	May	4200	4512	4070	3612	3209	0.27	0.28	0.33	0.33	0.27	3012	3120	1690	1450	1400	1.35	1.36	1.4	1.4	1.37	5200.2	5506.56	3709.1	3221.96	2784.43	7600	8000	8500	9000	9600	8002	9430	9500	9900	10600	32000	33000	34000	35000	36500	16.2506	16.6865	10.9091	9.2056	7.62858	23.75
Home 202	Renovation	2023	May	3802	4090	3730	3390	3300	0.31	0.31	0.38	0.34	0.34	2850	3060	3229	1080	1106	1.29	1.29	1.38	1.32	1.32	4855.12	5215.3	5873.42	2578.2	2581.92	6850	7100	7400	7750	8100	7200	6850	7630	8720	8900	24000	25400	26100	27600	28500	20.2297	20.5327	22.5035	9.3413	9.05937	28.5417
Home 203	Renovation	2023	May	3312	3660	3100	2665	2612	0.32	0.32	0.39	0.32	0.32	2900	3100	3005	1712	1560	1.22	1.22	1.3	1.26	1.26	4597.84	4953.2	5115.5	3009.92	2801.44	7400	7700	8000	8500	9000	4250	5250	5300	6400	7250	28200	29000	29800	30200	32600	16.3044	17.08	17.1661	9.96662	8.59337	26.2411
[truncated: 36 more columns]

## Sheet: Monthly Panel Data for DiD 
home_id	group	date	intervention_year	intervention_month	treat_date1	treat_date2	% All Three	% Energy	% Food	% Rent	electricity_kwh	energy_bills	gas_m3	grocery_bills	rental_bills	annual_income	monthly_income	total_monthly_expenses	residual_income	pct_residual_income	event_time1	event_time2	post1	post2
Home 1	Renovation	2020-01-01	2022	April	2022-04-01		81.65	15.74	18.09	47.83	104	181	30	208	550	13800	1150	939	211	18.3478	-27.0		0	0
Home 1	Renovation	2020-02-01	2022	April	2022-04-01		86.0	14.96	23.22	47.83	104	172	25	267	550	13800	1150	989	161	14	-26.0		0	0
Home 1	Renovation	2020-03-01	2022	April	2022-04-01		82.96	13.39	21.74	47.83	112	154	25	250	550	13800	1150	954	196	17.0435	-25.0		0	0
Home 1	Renovation	2020-04-01	2022	April	2022-04-01		76.96	11.57	17.57	47.83	92	133	23	202	550	13800	1150	885	265	23.0435	-24.0		0	0
Home 1	Renovation	2020-05-01	2022	April	2022-04-01		78.17	10.35	20.0	47.83	109	119	14	230	550	13800	1150	899	251	21.8261	-23.0		0	0
Home 1	Renovation	2020-06-01	2022	April	2022-04-01		83.3	9.3	26.17	47.83	107	107	11	301	550	13800	1150	958	192	16.6957	-22.0		0	0
Home 1	Renovation	2020-07-01	2022	April	2022-04-01		73.04	9.04	16.17	47.83	95	104	14	186	550	13800	1150	840	310	26.9565	-21.0		0	0
Home 1	Renovation	2020-08-01	2022	April	2022-04-01		77.91	9.48	20.61	47.83	89	109	13	237	550	13800	1150	896	254	22.087	-20.0		0	0
Home 1	Renovation	2020-09-01	2022	April	2022-04-01		83.48	10.7	24.96	47.83	118	123	13	287	550	13800	1150	960	190	16.5217	-19.0		0	0
Home 1	Renovation	2020-10-01	2022	April	2022-04-01		79.22	12.26	19.13	47.83	114	141	20	220	550	13800	1150	911	239	20.7826	-18.0		0	0
Home 1	Renovation	2020-11-01	2022	April	2022-04-01		81.48	13.91	19.74	47.83	103	160	21	227	550	13800	1150	937	213	18.5217	-17.0		0	0
Home 1	Renovation	2020-12-01	2022	April	2022-04-01		87.04	16.35	22.87	47.83	94	188	26	263	550	13800	1150	1001	149	12.9565	-16.0		0	0
Home 1	Renovation	2021-01-01	2022	April	2022-04-01		87.66	15.49	23.23	48.94	160	182	58	273	575	14100	1175	1030	145	12.3404	-15.0		0	0
Home 1	Renovation	2021-02-01	2022	April	2022-04-01		81.36	14.38	18.04	48.94	144	169	43	212	575	14100	1175	956	219	18.6383	-14.0		0	0
Home 1	Renovation	2021-03-01	2022	April	2022-04-01		80.6	12.85	18.81	48.94	161	151	38	221	575	14100	1175	947	228	19.4043	-13.0		0	0
Home 1	Renovation	2021-04-01	2022	April	2022-04-01		78.98	11.23	18.81	48.94	146	132	37	221	575	14100	1175	928	247	21.0213	-12.0		0	0
Home 1	Renovation	2021-05-01	2022	April	2022-04-01		85.28	9.96	26.38	48.94	125	117	28	310	575	14100	1175	1002	173	14.7234	-11.0		0	0
Home 1	Renovation	2021-06-01	2022	April	2022-04-01		84.17	8.94	26.3	48.94	127	105	28	309	575	14100	1175	989	186	15.8298	-10.0		0	0
Home 1	Renovation	2021-07-01	2022	April	2022-04-01		80.6	8.6	23.06	48.94	131	101	21	271	575	14100	1175	947	228	19.4043	-9.0		0	0
Home 1	Renovation	2021-08-01	2022	April	2022-04-01		79.49	9.11	21.45	48.94	161	107	21	252	575	14100	1175	934	241	20.5106	-8.0		0	0
Home 1	Renovation	2021-09-01	2022	April	2022-04-01		81.19	10.13	22.13	48.94	137	119	45	260	575	14100	1175	954	221	18.8085	-7.0		0	0
Home 1	Renovation	2021-10-01	2022	April	2022-04-01		84.77	11.83	24.0	48.94	123	139	42	282	575	14100	1175	996	179	15.234	-6.0		0	0
Home 1	Renovation	2021-11-01	2022	April	2022-04-01		80.34	13.28	18.13	48.94	148	156	54	213	575	14100	1175	944	231	19.6596	-5.0		0	0
Home 1	Renovation	2021-12-01	2022	April	2022-04-01		89.87	15.74	25.19	48.94	152	185	53	296	575	14100	1175	1056	119	10.1277	-4.0		0	0
Home 1	Renovation	2022-01-01	2022	April	2022-04-01		95.02	25.23	20.0	49.79	161	304	67	241	600	14460	1205	1145	60	4.97925	-3.0		0	0
Home 1	Renovation	2022-02-01	2022	April	2022-04-01		99.67	28.38	21.49	49.79	159	342	74	259	600	14460	1205	1201	4	0.33195	-2.0		0	0
Home 1	Renovation	2022-03-01	2022	April	2022-04-01		101.66	25.39	26.47	49.79	126	306	50	319	600	14460	1205	1225	-20	-1.65975	-1.0		0	0
Home 1	Renovation	2022-04-01	2022	April	2022-04-01		85.39	15.6	20.0	49.79	138	188	37	241	600	14460	1205	1029	176	14.6058	0.0		1	0
Home 1	Renovation	2022-05-01	2022	April	2022-04-01		87.39	13.78	23.82	49.79	141	166	25	287	600	14460	1205	1053	152	12.6141	1.0		1	0
Home 1	Renovation	2022-06-01	2022	April	2022-04-01		84.07	12.45	21.83	49.79	129	150	21	263	600	14460	1205	1013	192	15.9336	2.0		1	0
Home 1	Renovation	2022-07-01	2022	April	2022-04-01		85.48	12.03	23.65	49.79	132	145	18	285	600	14460	1205	1030	175	14.5228	3.0		1	0
Home 1	Renovation	2022-08-01	2022	April	2022-04-01		79.75	12.53	17.43	49.79	144	151	31	210	600	14460	1205	961	244	20.249	4.0		1	0
Home 1	Renovation	2022-09-01	2022	April	2022-04-01		83.57	14.19	19.59	49.79	138	171	28	236	600	14460	1205	1007	198	16.4315	5.0		1	0
Home 1	Renovation	2022-10-01	2022	April	2022-04-01		88.3	16.51	21.99	49.79	145	199	30	265	600	14460	1205	1064	141	11.7012	6.0		1	0
Home 1	Renovation	2022-11-01	2022	April	2022-04-01		95.19	18.34	27.05	49.79	157	221	51	326	600	14460	1205	1147	58	4.81328	7.0		1	0
Home 1	Renovation	2022-12-01	2022	April	2022-04-01		97.1	21.74	25.56	49.79	140	262	46	308	600	14460	1205	1170	35	2.90456	8.0		1	0
Home 1	Renovation	2023-01-01	2022	April	2022-04-01		91.81	17.19	24.02	50.6	153	214	62	299	630	14940	1245	1143	102	8.19277	9.0		1	0
Home 1	Renovation	2023-02-01	2022	April	2022-04-01		92.45	14.62	27.23	50.6	153	182	29	339	630	14940	1245	1151	94	7.5502	10.0		1	0
Home 1	Renovation	2023-03-01	2022	April	2022-04-01		84.58	13.01	20.96	50.6	149	162	30	261	630	14940	1245	1053	192	15.4217	11.0		1	0
Home 1	Renovation	2023-04-01	2022	April	2022-04-01		87.63	11.24	25.78	50.6	144	140	34	321	630	14940	1245	1091	154	12.3695	12.0		1	0
Home 1	Renovation	2023-05-01	2022	April	2022-04-01		82.25	10.04	21.61	50.6	143	125	29	269	630	14940	1245	1024	221	17.751	13.0		1	0
Home 1	Renovation	2023-06-01	2022	April	2022-04-01		77.91	9.0	18.31	50.6	145	112	19	228	630	14940	1245	970	275	22.0884	14.0		1	0
Home 1	Renovation	2023-07-01	2022	April	2022-04-01		82.89	8.76	23.53	50.6	148	109	16	293	630	14940	1245	1032	213	17.1084	15.0		1	0
Home 1	Renovation	2023-08-01	2022	April	2022-04-01		87.95	9.32	28.03	50.6	152	116	15	349	630	14940	1245	1095	150	12.0482	16.0		1	0
Home 1	Renovation	2023-09-01	2022	April	2022-04-01		87.47	10.28	26.59	50.6	149	128	13	331	630	14940	1245	1089	156	12.5301	17.0		1	0
Home 1	Renovation	2023-10-01	2022	April	2022-04-01		87.15	11.81	24.74	50.6	151	147	19	308	630	14940	1245	1085	160	12.8514	18.0		1	0
Home 1	Renovation	2023-11-01	2022	April	2022-04-01		102.57	13.49	38.47	50.6	155	168	21	479	630	14940	1245	1277	-32	-2.57028	19.0		1	0
Home 1	Renovation	2023-12-01	2022	April	2022-04-01		95.5	15.82	29.08	50.6	159	197	36	362	630	14940	1245	1189	56	4.49799	20.0		1	0
Home 1	Renovation	2024-01-01	2022	April	2022-04-01		87.0	13.93	20.93	52.14	166	179	50	269	670	15420	1285	1118	167	12.9961	21.0		1	0
Home 1	Renovation	2024-02-01	2022	April	2022-04-01		91.13	12.68	26.3	52.14	145	163	25	338	670	15420	1285	1171	114	8.8716	22.0		1	0
Home 1	Renovation	2024-03-01	2022	April	2022-04-01		77.43	11.13	14.16	52.14	166	143	38	182	670	15420	1285	995	290	22.5681	23.0		1	0
Home 1	Renovation	2024-04-01	2022	April	2022-04-01		76.89	9.88	14.86	52.14	133	127	25	191	670	15420	1285	988	297	23.1128	24.0		1	0
Home 1	Renovation	2024-05-01	2022	April	2022-04-01		85.99	8.87	24.98	52.14	146	114	18	321	670	15420	1285	1105	180	14.0078	25.0		1	0
Home 1	Renovation	2024-06-01	2022	April	2022-04-01		75.8	7.86	15.8	52.14	133	101	19	203	670	15420	1285	974	311	24.2023	26.0		1	0
Home 1	Renovation	2024-07-01	2022	April	2022-04-01		78.21	7.55	18.52	52.14	144	97	17	238	670	15420	1285	1005	280	21.7899	27.0		1	0
Home 1	Renovation	2024-08-01	2022	April	2022-04-01		82.41	7.94	22.33	52.14	125	102	17	287	670	15420	1285	1059	226	17.5875	28.0		1	0
Home 1	Renovation	2024-09-01	2022	April	2022-04-01		82.57	8.95	21.48	52.14	135	115	13	276	670	15420	1285	1061	224	17.4319	29.0		1	0
Home 1	Renovation	2024-10-01	2022	April	2022-04-01		87.24	10.27	24.82	52.14	140	132	18	319	670	15420	1285	1121	164	12.7626	30.0		1	0
Home 1	Renovation	2024-11-01	2022	April	2022-04-01		87.63	11.6	23.89	52.14	129	149	21	307	670	15420	1285	1126	159	12.3735	31.0		1	0
Home 1	Renovation	2024-12-01	2022	April	2022-04-01		89.81	13.77	23.89	52.14	138	177	29	307	670	15420	1285	1154	131	10.1946	32.0		1	0
Home 2	Renovation	2020-01-01	2022	January	2022-01-01		54.11	10.82	13.61	29.67	158	248	48	312	680	27500	2291	1240	1051.67	45.8909	-24.0		0	0
Home 2	Renovation	2020-02-01	2022	January	2022-01-01		56.12	10.39	16.06	29.67	185	238	48	368	680	27500	2291	1286	1005.67	43.8836	-23.0		0	0
Home 2	Renovation	2020-03-01	2022	January	2022-01-01		55.03	9.08	16.28	29.67	190	208	33	373	680	27500	2291	1261	1030.67	44.9745	-22.0		0	0
Home 2	Renovation	2020-04-01	2022	January	2022-01-01		50.79	7.94	13.18	29.67	152	182	27	302	680	27500	2291	1164	1127.67	49.2073	-21.0		0	0
Home 2	Renovation	2020-05-01	2022	January	2022-01-01		50.01	7.2	13.13	29.67	153	165	31	301	680	27500	2291	1146	1145.67	49.9927	-20.0		0	0
Home 2	Renovation	2020-06-01	2022	January	2022-01-01		46.34	6.37	10.3	29.67	153	146	27	236	680	27500	2291	1062	1229.67	53.6582	-19.0		0	0
Home 2	Renovation	2020-07-01	2022	January	2022-01-01		49.09	6.15	13.27	29.67	149	141	19	304	680	27500	2291	1125	1166.67	50.9091	-18.0		0	0
Home 2	Renovation	2020-08-01	2022	January	2022-01-01		48.83	6.55	12.61	29.67	173	150	26	289	680	27500	2291	1119	1172.67	51.1709	-17.0		0	0
Home 2	Renovation	2020-09-01	2022	January	2022-01-01		50.36	7.24	13.44	29.67	162	166	29	308	680	27500	2291	1154	1137.67	49.6436	-16.0		0	0
Home 2	Renovation	2020-10-01	2022	January	2022-01-01		52.58	8.33	14.57	29.67	178	191	31	334	680	27500	2291	1205	1086.67	47.4182	-15.0		0	0
Home 2	Renovation	2020-11-01	2022	January	2022-01-01		53.63	9.64	14.31	29.67	168	221	46	328	680	27500	2291	1229	1062.67	46.3709	-14.0		0	0
Home 2	Renovation	2020-12-01	2022	January	2022-01-01		55.9	11.17	15.05	29.67	179	256	72	345	680	27500	2291	1281	1010.67	44.1018	-13.0		0	0
Home 2	Renovation	2021-01-01	2022	January	2022-01-01		52.47	10.76	13.57	28.14	209	260	57	328	680	29000	2416	1268	1148.67	47.531	-12.0		0	0
Home 2	Renovation	2021-02-01	2022	January	2022-01-01		51.56	10.34	13.08	28.14	174	250	72	316	680	29000	2416	1246	1170.67	48.4414	-11.0		0	0
Home 2	Renovation	2021-03-01	2022	January	2022-01-01		51.19	9.19	13.86	28.14	181	222	29	335	680	29000	2416	1237	1179.67	48.8138	-10.0		0	0
Home 2	Renovation	2021-04-01	2022	January	2022-01-01		45.35	8.03	9.19	28.14	186	194	43	222	680	29000	2416	1096	1320.67	54.6483	-9.0		0	0
Home 2	Renovation	2021-05-01	2022	January	2022-01-01		48.62	7.12	13.37	28.14	174	172	31	323	680	29000	2416	1175	1241.67	51.3793	-8.0		0	0
Home 2	Renovation	2021-06-01	2022	January	2022-01-01		48.12	6.37	13.61	28.14	178	154	22	329	680	29000	2416	1163	1253.67	51.8759	-7.0		0	0
Home 2	Renovation	2021-07-01	2022	January	2022-01-01		47.75	6.21	13.41	28.14	176	150	22	324	680	29000	2416	1154	1262.67	52.2483	-6.0		0	0
Home 2	Renovation	2021-08-01	2022	January	2022-01-01		48.25	6.54	13.57	28.14	158	158	16	328	680	29000	2416	1166	1250.67	51.7517	-5.0		0	0
Home 2	Renovation	2021-09-01	2022	January	2022-01-01		50.44	7.28	15.02	28.14	203	176	29	363	680	29000	2416	1219	1197.67	49.5586	-4.0		0	0
Home 2	Renovation	2021-10-01	2022	January	2022-01-01		49.28	8.4	12.74	28.14	184	203	42	308	680	29000	2416	1191	1225.67	50.7172	-3.0		0	0
Home 2	Renovation	2021-11-01	2022	January	2022-01-01		55.66	9.52	18.0	28.14	216	230	61	435	680	29000	2416	1345	1071.67	44.3448	-2.0		0	0
Home 2	Renovation	2021-12-01	2022	January	2022-01-01		55.66	11.34	16.18	28.14	201	274	55	391	680	29000	2416	1345	1071.67	44.3448	-1.0		0	0
Home 2	Renovation	2022-01-01	2022	January	2022-01-01		49.75	10.36	13.1	26.29	179	272	47	344	690	31500	2625	1306	1319	50.2476	0.0		1	0
Home 2	Renovation	2022-02-01	2022	January	2022-01-01		48.91	9.83	12.8	26.29	174	258	46	336	690	31500	2625	1284	1341	51.0857	1.0		1	0
Home 2	Renovation	2022-03-01	2022	January	2022-01-01		48.23	8.69	13.26	26.29	175	228	50	348	690	31500	2625	1266	1359	51.7714	2.0		1	0
Home 2	Renovation	2022-04-01	2022	January	2022-01-01		45.83	7.54	12.0	26.29	149	198	36	315	690	31500	2625	1203	1422	54.1714	3.0		1	0
Home 2	Renovation	2022-05-01	2022	January	2022-01-01		46.67	6.9	13.49	26.29	173	181	26	354	690	31500	2625	1225	1400	53.3333	4.0		1	0
Home 2	Renovation	2022-06-01	2022	January	2022-01-01		46.48	6.06	14.13	26.29	142	159	24	371	690	31500	2625	1220	1405	53.5238	5.0		1	0
Home 2	Renovation	2022-07-01	2022	January	2022-01-01		46.93	5.87	14.78	26.29	152	154	20	388	690	31500	2625	1232	1393	53.0667	6.0		1	0
Home 2	Renovation	2022-08-01	2022	January	2022-01-01		47.31	6.25	14.78	26.29	160	164	26	388	690	31500	2625	1242	1383	52.6857	7.0		1	0
Home 2	Renovation	2022-09-01	2022	January	2022-01-01		46.48	6.97	13.22	26.29	197	183	25	347	690	31500	2625	1220	1405	53.5238	8.0		1	0
Home 2	Renovation	2022-10-01	2022	January	2022-01-01		45.68	8.0	11.39	26.29	170	210	34	299	690	31500	2625	1199	1426	54.3238	9.0		1	0
Home 2	Renovation	2022-11-01	2022	January	2022-01-01		48.08	9.18	12.61	26.29	153	241	42	331	690	31500	2625	1262	1363	51.9238	10.0		1	0
Home 2	Renovation	2022-12-01	2022	January	2022-01-01		54.93	10.78	17.87	26.29	168	283	44	469	690	31500	2625	1442	1183	45.0667	11.0		1	0
Home 2	Renovation	2023-01-01	2022	January	2022-01-01		50.4	6.36	18.58	25.45	170	175	67	511	700	33000	2750	1386	1364	49.6	12.0		1	0
Home 2	Renovation	2023-02-01	2022	January	2022-01-01		46.62	4.25	16.91	25.45	164	117	56	465	700	33000	2750	1282	1468	53.3818	13.0		1	0
Home 2	Renovation	2023-03-01	2022	January	2022-01-01		43.31	3.78	14.07	25.45	160	104	47	387	700	33000	2750	1191	1559	56.6909	14.0		1	0
Home 2	Renovation	2023-04-01	2022	January	2022-01-01		44.95	3.35	16.15	25.45	157	92	34	444	700	33000	2750	1236	1514	55.0545	15.0		1	0
Home 2	Renovation	2023-05-01	2022	January	2022-01-01		41.56	2.98	13.13	25.45	156	82	20	361	700	33000	2750	1143	1607	58.4364	16.0		1	0
Home 2	Renovation	2023-06-01	2022	January	2022-01-01		43.02	2.65	14.91	25.45	157	73	19	410	700	33000	2750	1183	1567	56.9818	17.0		1	0
Home 2	Renovation	2023-07-01	2022	January	2022-01-01		43.96	2.58	15.93	25.45	160	71	16	438	700	33000	2750	1209	1541	56.0364	18.0		1	0
Home 2	Renovation	2023-08-01	2022	January	2022-01-01		43.75	2.69	15.6	25.45	163	74	15	429	700	33000	2750	1203	1547	56.2545	19.0		1	0
Home 2	Renovation	2023-09-01	2022	January	2022-01-01		48.0	2.98	19.56	25.45	159	82	21	538	700	33000	2750	1320	1430	52	20.0		1	0
Home 2	Renovation	2023-10-01	2022	January	2022-01-01		41.56	3.49	12.62	25.45	164	96	29	347	700	33000	2750	1143	1607	58.4364	21.0		1	0
Home 2	Renovation	2023-11-01	2022	January	2022-01-01		43.53	3.96	14.11	25.45	168	109	43	388	700	33000	2750	1197	1553	56.4727	22.0		1	0
Home 2	Renovation	2023-12-01	2022	January	2022-01-01		44.0	4.69	13.85	25.45	173	129	33	381	700	33000	2750	1210	1540	56	23.0		1	0
Home 2	Renovation	2024-01-01	2022	January	2022-01-01		38.91	4.24	11.59	23.08	148	124	63	339	675	35100	2925	1138	1787	61.094	24.0		1	0
Home 2	Renovation	2024-02-01	2022	January	2022-01-01		41.85	3.93	14.84	23.08	193	115	50	434	675	35100	2925	1224	1701	58.1538	25.0		1	0
Home 2	Renovation	2024-03-01	2022	January	2022-01-01		37.68	3.52	11.08	23.08	120	103	29	324	675	35100	2925	1102	1823	62.3248	26.0		1	0
Home 2	Renovation	2024-04-01	2022	January	2022-01-01		43.08	3.04	16.96	23.08	153	89	35	496	675	35100	2925	1260	1665	56.9231	27.0		1	0
Home 2	Renovation	2024-05-01	2022	January	2022-01-01		40.27	2.77	14.43	23.08	192	81	28	422	675	35100	2925	1178	1747	59.7265	28.0		1	0
Home 2	Renovation	2024-06-01	2022	January	2022-01-01		40.82	2.46	15.28	23.08	162	72	38	447	675	35100	2925	1194	1731	59.1795	29.0		1	0
Home 2	Renovation	2024-07-01	2022	January	2022-01-01		41.61	2.39	16.14	23.08	157	70	17	472	675	35100	2925	1217	1708	58.3932	30.0		1	0
Home 2	Renovation	2024-08-01	2022	January	2022-01-01		39.69	2.53	14.09	23.08	134	74	20	412	675	35100	2925	1161	1764	60.3077	31.0		1	0
Home 2	Renovation	2024-09-01	2022	January	2022-01-01		44.03	2.8	18.15	23.08	175	82	21	531	675	35100	2925	1288	1637	55.9658	32.0		1	0
Home 2	Renovation	2024-10-01	2022	January	2022-01-01		40.79	3.28	14.43	23.08	142	96	19	422	675	35100	2925	1193	1732	59.2137	33.0		1	0
Home 2	Renovation	2024-11-01	2022	January	2022-01-01		43.56	3.69	16.79	23.08	144	108	34	491	675	35100	2925	1274	1651	56.4444	34.0		1	0
Home 2	Renovation	2024-12-01	2022	January	2022-01-01		43.15	4.38	15.69	23.08	185	128	37	459	675	35100	2925	1262	1663	56.8547	35.0		1	0
Home 3	Control	2020-01-01					69.99	11.03	15.7	43.26	171	170	55	242	667	18500	1541	1079	462.667	30.0108			0	0
Home 3	Control	2020-02-01					71.55	10.44	17.84	43.26	164	161	38	275	667	18500	1541	1103	438.667	28.4541			0	0
Home 3	Control	2020-03-01					68.43	9.21	15.96	43.26	168	142	48	246	667	18500	1541	1055	486.667	31.5676			0	0
Home 3	Control	2020-04-01					69.54	8.11	18.16	43.26	171	125	23	280	667	18500	1541	1072	469.667	30.4649			0	0
Home 3	Control	2020-05-01					65.71	7.26	15.18	43.26	163	112	28	234	667	18500	1541	1013	528.667	34.2919			0	0
Home 3	Control	2020-06-01					67.01	6.49	17.25	43.26	184	100	30	266	667	18500	1541	1033	508.667	32.9946			0	0
Home 3	Control	2020-07-01					70.9	6.36	21.28	43.26	166	98	15	328	667	18500	1541	1093	448.667	29.1027			0	0
Home 3	Control	2020-08-01					65.32	6.68	15.37	43.26	155	103	18	237	667	18500	1541	1007	534.667	34.6811			0	0
Home 3	Control	2020-09-01					68.69	7.46	17.97	43.26	153	115	25	277	667	18500	1541	1059	482.667	31.3081			0	0
Home 3	Control	2020-10-01					69.21	8.56	17.38	43.26	185	132	29	268	667	18500	1541	1067	474.667	30.7892			0	0
Home 3	Control	2020-11-01					65.97	9.66	13.04	43.26	182	149	29	201	667	18500	1541	1017	524.667	34.0324			0	0
Home 3	Control	2020-12-01					71.87	11.42	17.19	43.26	191	176	51	265	667	18500	1541	1108	433.667	28.1297			0	0
Home 3	Control	2021-01-01					77.43	13.77	20.53	43.14	174	218	45	325	683	19000	1583	1226	357.333	22.5684			0	0
Home 3	Control	2021-02-01					75.54	14.21	18.19	43.14	179	225	57	288	683	19000	1583	1196	387.333	24.4632			0	0
Home 3	Control	2021-03-01					71.56	12.63	15.79	43.14	189	200	38	250	683	19000	1583	1133	450.333	28.4421			0	0
Home 3	Control	2021-04-01					73.96	10.99	19.83	43.14	168	174	47	314	683	19000	1583	1171	412.333	26.0421			0	0
Home 3	Control	2021-05-01					70.67	9.92	17.62	43.14	155	157	25	279	683	19000	1583	1119	464.333	29.3263			0	0
Home 3	Control	2021-06-01					71.37	8.78	19.45	43.14	171	139	22	308	683	19000	1583	1130	453.333	28.6316			0	0
Home 3	Control	2021-07-01					71.37	8.53	19.71	43.14	160	135	25	312	683	19000	1583	1130	453.333	28.6316			0	0
Home 3	Control	2021-08-01					68.65	9.03	16.48	43.14	176	143	19	261	683	19000	1583	1087	496.333	31.3474			0	0
Home 3	Control	2021-09-01					73.64	9.98	20.53	43.14	170	158	30	325	683	19000	1583	1166	417.333	26.3579			0	0
Home 3	Control	2021-10-01					70.93	11.43	16.36	43.14	182	181	47	259	683	19000	1583	1123	460.333	29.0737			0	0
Home 3	Control	2021-11-01					72.25	13.2	15.92	43.14	182	209	35	252	683	19000	1583	1144	439.333	27.7474			0	0
Home 3	Control	2021-12-01					76.74	15.54	18.06	43.14	197	246	61	286	683	19000	1583	1215	368.333	23.2632			0	0
Home 3	Control	2022-01-01					74.77	14.28	16.92	43.57	180	232	65	275	708	19500	1625	1215	410	25.2308			0	0
Home 3	Control	2022-02-01					74.46	12.98	17.91	43.57	156	211	67	291	708	19500	1625	1210	415	25.5385			0	0
Home 3	Control	2022-03-01					71.51	11.51	16.43	43.57	150	187	39	267	708	19500	1625	1162	463	28.4923			0	0
Home 3	Control	2022-04-01					73.42	10.15	19.69	43.57	159	165	31	320	708	19500	1625	1193	432	26.5846			0	0
Home 3	Control	2022-05-01					71.63	9.11	18.95	43.57	164	148	36	308	708	19500	1625	1164	461	28.3692			0	0
Home 3	Control	2022-06-01					68.55	8.06	16.92	43.57	149	131	27	275	708	19500	1625	1114	511	31.4462			0	0
Home 3	Control	2022-07-01					72.06	7.82	20.68	43.57	160	127	24	336	708	19500	1625	1171	454	27.9385			0	0
Home 3	Control	2022-08-01					73.11	8.18	21.35	43.57	161	133	27	347	708	19500	1625	1188	437	26.8923			0	0
Home 3	Control	2022-09-01					71.02	9.29	18.15	43.57	160	151	29	295	708	19500	1625	1154	471	28.9846			0	0
Home 3	Control	2022-10-01					72.0	10.71	17.72	43.57	158	174	44	288	708	19500	1625	1170	455	28			0	0
Home 3	Control	2022-11-01					70.58	12.18	14.83	43.57	158	198	55	241	708	19500	1625	1147	478	29.4154			0	0
Home 3	Control	2022-12-01					76.62	14.15	18.89	43.57	201	230	57	307	708	19500	1625	1245	380	23.3846			0	0
Home 3	Control	2023-01-01					75.1	14.03	17.31	43.76	160	235	86	290	733	20100	1675	1258	417	24.8955			0	0
Home 3	Control	2023-02-01					76.06	13.25	19.04	43.76	151	222	57	319	733	20100	1675	1274	401	23.9403			0	0
Home 3	Control	2023-03-01					73.55	11.76	18.03	43.76	147	197	31	302	733	20100	1675	1232	443	26.4478			0	0
Home 3	Control	2023-04-01					73.49	10.27	19.46	43.76	144	172	40	326	733	20100	1675	1231	444	26.5075			0	0
Home 3	Control	2023-05-01					77.97	9.19	25.01	43.76	143	154	22	419	733	20100	1675	1306	369	22.0299			0	0
Home 3	Control	2023-06-01					69.31	8.3	17.25	43.76	145	139	27	289	733	20100	1675	1161	514	30.6866			0	0
Home 3	Control	2023-07-01					69.31	8.0	17.55	43.76	147	134	27	294	733	20100	1675	1161	514	30.6866			0	0
Home 3	Control	2023-08-01					67.34	8.42	15.16	43.76	150	141	18	254	733	20100	1675	1128	547	32.6567			0	0
Home 3	Control	2023-09-01					72.06	9.37	18.93	43.76	148	157	36	317	733	20100	1675	1207	468	27.9403			0	0
Home 3	Control	2023-10-01					77.01	10.87	22.39	43.76	151	182	40	375	733	20100	1675	1290	385	22.9851			0	0
Home 3	Control	2023-11-01					69.91	12.3	13.85	43.76	154	206	54	232	733	20100	1675	1171	504	30.0896			0	0
Home 3	Control	2023-12-01					76.54	14.63	18.15	43.76	160	245	91	304	733	20100	1675	1282	393	23.4627			0	0
Home 3	Control	2024-01-01					70.95	12.28	17.39	41.28	135	223	58	316	750	21800	1816.67	1289	527.667	29.0459			0	0
Home 3	Control	2024-02-01					72.44	11.01	20.15	41.28	146	200	46	366	750	21800	1816.67	1316	500.667	27.5596			0	0
Home 3	Control	2024-03-01					69.91	9.74	18.88	41.28	213	177	37	343	750	21800	1816.67	1270	546.667	30.0917			0	0
Home 3	Control	2024-04-01					68.53	8.53	18.72	41.28	141	155	31	340	750	21800	1816.67	1245	571.667	31.4679			0	0
Home 3	Control	2024-05-01					66.22	7.65	17.28	41.28	147	139	31	314	750	21800	1816.67	1203	613.667	33.7798			0	0
Home 3	Control	2024-06-01					67.82	6.88	19.65	41.28	164	125	26	357	750	21800	1816.67	1232	584.667	32.1835			0	0
Home 3	Control	2024-07-01					69.69	6.61	21.8	41.28	161	120	24	396	750	21800	1816.67	1266	550.667	30.3119			0	0
Home 3	Control	2024-08-01					61.71	7.05	13.38	41.28	162	128	31	243	750	21800	1816.67	1121	695.667	38.2936			0	0
Home 3	Control	2024-09-01					69.69	7.87	20.53	41.28	184	143	32	373	750	21800	1816.67	1266	550.667	30.3119			0	0
Home 3	Control	2024-10-01					67.82	9.03	17.5	41.28	148	164	58	318	750	21800	1816.67	1232	584.667	32.1835			0	0
Home 3	Control	2024-11-01					67.87	10.24	16.35	41.28	169	186	46	297	750	21800	1816.67	1233	583.667	32.1284			0	0
Home 3	Control	2024-12-01					65.83	12.06	12.5	41.28	171	219	123	227	750	21800	1816.67	1196	620.667	34.1651			0	0
Home 4	Control	2020-01-01					89.94	9.23	19.99	60.71	52	114	178	247	750	14824	1235.33	1111	124.333	10.0648			0	0
Home 4	Control	2020-02-01					88.72	8.82	19.19	60.71	55	109	128	237	750	14824	1235.33	1096	139.333	11.279			0	0
Home 4	Control	2020-03-01					90.58	7.85	22.02	60.71	56	97	103	272	750	14824	1235.33	1119	116.333	9.41716			0	0
Home 4	Control	2020-04-01					94.63	6.88	27.04	60.71	53	85	111	334	750	14824	1235.33	1169	66.3333	5.36967			0	0
Home 4	Control	2020-05-01					89.61	6.07	22.83	60.71	54	75	79	282	750	14824	1235.33	1107	128.333	10.3886			0	0
Home 4	Control	2020-06-01					94.71	5.5	28.49	60.71	50	68	74	352	750	14824	1235.33	1170	65.3333	5.28872			0	0
Home 4	Control	2020-07-01					83.14	5.26	17.16	60.71	47	65	64	212	750	14824	1235.33	1027	208.333	16.8645			0	0
Home 4	Control	2020-08-01					86.05	5.5	19.83	60.71	47	68	64	245	750	14824	1235.33	1063	172.333	13.9504			0	0
Home 4	Control	2020-09-01					90.42	6.23	23.48	60.71	51	77	72	290	750	14824	1235.33	1117	118.333	9.57906			0	0
Home 4	Control	2020-10-01					94.14	7.2	26.23	60.71	49	89	81	324	750	14824	1235.33	1163	72.3333	5.85537			0	0
Home 4	Control	2020-11-01					92.53	8.26	23.56	60.71	52	102	121	291	750	14824	1235.33	1143	92.3333	7.47437			0	0
Home 4	Control	2020-12-01					95.6	9.55	25.34	60.71	52	118	193	313	750	14824	1235.33	1181	54.3333	4.39827			0	0
Home 4	Control	2021-01-01					90.35	7.54	21.33	61.49	52	94	157	266	767	14968	1247.33	1127	120.333	9.64725			0	0
Home 4	Control	2021-02-01					85.22	6.25	17.48	61.49	59	78	109	218	767	14968	1247.33	1063	184.333	14.7782			0	0
Home 4	Control	2021-03-01					92.36	5.53	25.33	61.49	53	69	118	316	767	14968	1247.33	1152	95.3333	7.64297			0	0
Home 4	Control	2021-04-01					86.66	4.81	20.36	61.49	55	60	99	254	767	14968	1247.33	1081	166.333	13.3351			0	0
Home 4	Control	2021-05-01					91.56	4.41	25.65	61.49	51	55	66	320	767	14968	1247.33	1142	105.333	8.44468			0	0
Home 4	Control	2021-06-01					87.63	3.85	22.29	61.49	47	48	62	278	767	14968	1247.33	1093	154.333	12.3731			0	0
Home 4	Control	2021-07-01					91.07	3.77	25.82	61.49	49	47	56	322	767	14968	1247.33	1136	111.333	8.92571			0	0
Home 4	Control	2021-08-01					89.15	4.01	23.65	61.49	45	50	50	295	767	14968	1247.33	1112	135.333	10.8498			0	0
Home 4	Control	2021-09-01					88.11	4.41	22.21	61.49	50	55	81	277	767	14968	1247.33	1099	148.333	11.892			0	0
Home 4	Control	2021-10-01					89.55	5.13	22.93	61.49	48	64	109	286	767	14968	1247.33	1117	130.333	10.449			0	0
Home 4	Control	2021-11-01					86.18	5.85	18.84	61.49	55	73	147	235	767	14968	1247.33	1075	172.333	13.8161			0	0
Home 4	Control	2021-12-01					92.76	6.97	24.29	61.49	53	87	188	303	767	14968	1247.33	1157	90.3333	7.24212			0	0
Home 4	Control	2022-01-01					95.84	8.1	26.73	61.01	53	104	113	343	783	15400	1283.33	1230	53.3333	4.15584			0	0
Home 4	Control	2022-02-01					94.83	8.42	25.4	61.01	52	108	113	326	783	15400	1283.33	1217	66.3333	5.16883			0	0
Home 4	Control	2022-03-01					88.21	7.48	19.71	61.01	56	96	123	253	783	15400	1283.33	1132	151.333	11.7922			0	0
Home 4	Control	2022-04-01					91.01	6.47	23.53	61.01	48	83	99	302	783	15400	1283.33	1168	115.333	8.98701			0	0
Home 4	Control	2022-05-01					90.16	5.84	23.3	61.01	47	75	82	299	783	15400	1283.33	1157	126.333	9.84416			0	0
Home 4	Control	2022-06-01					91.09	5.14	24.94	61.01	50	66	115	320	783	15400	1283.33	1169	114.333	8.90909			0	0
Home 4	Control	2022-07-01					89.06	4.99	23.06	61.01	53	64	59	296	783	15400	1283.33	1143	140.333	10.9351			0	0
Home 4	Control	2022-08-01					88.44	5.22	22.21	61.01	51	67	70	285	783	15400	1283.33	1135	148.333	11.5584			0	0
Home 4	Control	2022-09-01					93.43	5.84	26.57	61.01	58	75	87	341	783	15400	1283.33	1199	84.3333	6.57143			0	0
Home 4	Control	2022-10-01					90.86	6.86	22.99	61.01	49	88	107	295	783	15400	1283.33	1166	117.333	9.14286			0	0
Home 4	Control	2022-11-01					94.99	7.71	26.26	61.01	47	99	109	337	783	15400	1283.33	1219	64.3333	5.01299			0	0
Home 4	Control	2022-12-01					97.71	9.27	27.43	61.01	57	119	172	352	783	15400	1283.33	1254	29.3333	2.28571			0	0
Home 4	Control	2023-01-01					95.05	12.59	23.93	58.54	64	172	101	327	800	16400	1366.67	1299	67.6667	4.95122			0	0
Home 4	Control	2023-02-01					96.59	13.46	24.59	58.54	65	184	87	336	800	16400	1366.67	1320	46.6667	3.41463			0	0
Home 4	Control	2023-03-01					107.2	12.0	36.66	58.54	64	164	69	501	800	16400	1366.67	1465	-98.3333	-7.19512			0	0
Home 4	Control	2023-04-01					95.85	10.54	26.78	58.54	63	144	65	366	800	16400	1366.67	1310	56.6667	4.14634			0	0
Home 4	Control	2023-05-01					90.95	9.37	23.05	58.54	62	128	92	315	800	16400	1366.67	1243	123.667	9.04878			0	0
Home 4	Control	2023-06-01					88.24	8.41	21.29	58.54	63	115	26	291	800	16400	1366.67	1206	160.667	11.7561			0	0
Home 4	Control	2023-07-01					98.49	8.2	31.76	58.54	64	112	44	434	800	16400	1366.67	1346	20.6667	1.5122			0	0
Home 4	Control	2023-08-01					94.61	8.63	27.44	58.54	65	118	28	375	800	16400	1366.67	1293	73.6667	5.39024			0	0
Home 4	Control	2023-09-01					91.1	9.66	22.9	58.54	65	132	47	313	800	16400	1366.67	1245	121.667	8.90244			0	0
Home 4	Control	2023-10-01					99.29	11.27	29.49	58.54	66	154	89	403	800	16400	1366.67	1357	9.66667	0.707317			0	0
Home 4	Control	2023-11-01					98.27	12.59	27.15	58.54	67	172	84	371	800	16400	1366.67	1343	23.6667	1.73171			0	0
Home 4	Control	2023-12-01					94.61	14.93	21.15	58.54	69	204	80	289	800	16400	1366.67	1293	73.6667	5.39024			0	0
Home 4	Control	2024-01-01					91.6	11.86	22.74	57.0	66	170	87	326	817	17200	1433.33	1313	120.333	8.39535			0	0
Home 4	Control	2024-02-01					93.21	10.19	26.02	57.0	70	146	116	373	817	17200	1433.33	1336	97.3333	6.7907			0	0
Home 4	Control	2024-03-01					99.14	9.0	33.14	57.0	72	129	69	475	817	17200	1433.33	1421	12.3333	0.860465			0	0
Home 4	Control	2024-04-01					85.81	7.81	21.0	57.0	54	112	70	301	817	17200	1433.33	1230	203.333	14.186			0	0
Home 4	Control	2024-05-01					86.16	6.98	22.19	57.0	61	100	55	318	817	17200	1433.33	1235	198.333	13.8372			0	0
Home 4	Control	2024-06-01					91.74	6.28	28.47	57.0	65	90	37	408	817	17200	1433.33	1315	118.333	8.25581			0	0
Home 4	Control	2024-07-01					85.33	6.14	22.19	57.0	63	88	67	318	817	17200	1433.33	1223	210.333	14.6744			0	0
Home 4	Control	2024-08-01					86.02	6.42	22.6	57.0	61	92	51	324	817	17200	1433.33	1233	200.333	13.9767			0	0
Home 4	Control	2024-09-01					83.3	7.26	19.05	57.0	69	104	33	273	817	17200	1433.33	1194	239.333	16.6977			0	0
Home 4	Control	2024-10-01					81.63	8.23	16.4	57.0	72	118	73	235	817	17200	1433.33	1170	263.333	18.3721			0	0
Home 4	Control	2024-11-01					91.47	9.35	25.12	57.0	55	134	72	360	817	17200	1433.33	1311	122.333	8.53488			0	0
Home 4	Control	2024-12-01					86.3	11.02	18.28	57.0	81	158	135	262	817	17200	1433.33	1237	196.333	13.6977			0	0
Home 5	Control	2020-01-01					73.91	8.02	29.89	36.0	73	151	64	563	678	22600	1883.33	1392	491.333	26.0885			0	0
Home 5	Control	2020-02-01					71.89	7.59	28.3	36.0	81	143	66	533	678	22600	1883.33	1354	529.333	28.1062			0	0
Home 5	Control	2020-03-01					72.9	6.74	30.16	36.0	76	127	63	568	678	22600	1883.33	1373	510.333	27.0973			0	0
Home 5	Control	2020-04-01					65.84	5.89	23.95	36.0	79	111	53	451	678	22600	1883.33	1240	643.333	34.1593			0	0
Home 5	Control	2020-05-01					68.02	5.26	26.76	36.0	76	99	30	504	678	22600	1883.33	1281	602.333	31.9823			0	0
Home 5	Control	2020-06-01					75.66	4.67	34.99	36.0	74	88	28	659	678	22600	1883.33	1425	458.333	24.3363			0	0
Home 5	Control	2020-07-01					70.25	4.57	29.68	36.0	73	86	25	559	678	22600	1883.33	1323	560.333	29.7522			0	0
Home 5	Control	2020-08-01					71.79	4.83	30.96	36.0	70	91	26	583	678	22600	1883.33	1352	531.333	28.2124			0	0
Home 5	Control	2020-09-01					70.35	5.42	28.94	36.0	70	102	52	545	678	22600	1883.33	1325	558.333	29.646			0	0
Home 5	Control	2020-10-01					71.31	6.11	29.2	36.0	70	115	52	550	678	22600	1883.33	1343	540.333	28.6903			0	0
Home 5	Control	2020-11-01					70.19	6.96	27.24	36.0	75	131	47	513	678	22600	1883.33	1322	561.333	29.8053			0	0
Home 5	Control	2020-12-01					90.74	8.34	46.41	36.0	84	157	90	874	678	22600	1883.33	1709	174.333	9.25664			0	0
Home 5	Control	2021-01-01					70.85	7.68	29.81	33.36	77	160	123	621	695	25000	2083.33	1476	607.333	29.152			0	0
Home 5	Control	2021-02-01					71.76	7.3	31.1	33.36	87	152	96	648	695	25000	2083.33	1495	588.333	28.24			0	0
Home 5	Control	2021-03-01					63.7	6.48	23.86	33.36	76	135	51	497	695	25000	2083.33	1327	756.333	36.304			0	0
Home 5	Control	2021-04-01					75.46	5.66	36.43	33.36	76	118	50	759	695	25000	2083.33	1572	511.333	24.544			0	0
Home 5	Control	2021-05-01					68.83	5.04	30.43	33.36	78	105	56	634	695	25000	2083.33	1434	649.333	31.168			0	0
Home 5	Control	2021-06-01					70.22	4.56	32.3	33.36	80	95	31	673	695	25000	2083.33	1463	620.333	29.776			0	0
Home 5	Control	2021-07-01					68.64	4.46	30.82	33.36	73	93	35	642	695	25000	2083.33	1430	653.333	31.36			0	0
Home 5	Control	2021-08-01					70.32	4.66	32.3	33.36	78	97	41	673	695	25000	2083.33	1465	618.333	29.68			0	0
Home 5	Control	2021-09-01					70.03	5.23	31.44	33.36	79	109	38	655	695	25000	2083.33	1459	624.333	29.968			0	0
Home 5	Control	2021-10-01					71.38	5.95	32.06	33.36	78	124	57	668	695	25000	2083.33	1487	596.333	28.624			0	0
Home 5	Control	2021-11-01					72.53	6.86	32.3	33.36	76	143	39	673	695	25000	2083.33	1511	572.333	27.472			0	0
Home 5	Control	2021-12-01					75.74	7.97	34.42	33.36	86	166	74	717	695	25000	2083.33	1578	505.333	24.256			0	0
Home 5	Control	2022-01-01					76.95	10.17	34.17	32.61	90	222	85	746	712	26200	2183.33	1680	503.333	23.0534			0	0
Home 5	Control	2022-02-01					84.18	10.76	40.81	32.61	87	235	66	891	712	26200	2183.33	1838	345.333	15.8168			0	0
Home 5	Control	2022-03-01					81.8	9.66	39.53	32.61	89	211	94	863	712	26200	2183.33	1786	397.333	18.1985			0	0
Home 5	Control	2022-04-01					80.61	8.43	39.57	32.61	87	184	43	864	712	26200	2183.33	1760	423.333	19.3893			0	0
Home 5	Control	2022-05-01					73.47	7.6	33.25	32.61	76	166	44	726	712	26200	2183.33	1604	579.333	26.5344			0	0
Home 5	Control	2022-06-01					81.57	6.78	42.18	32.61	79	148	38	921	712	26200	2183.33	1781	402.333	18.4275			0	0
Home 5	Control	2022-07-01					81.16	6.6	41.95	32.61	77	144	43	916	712	26200	2183.33	1772	411.333	18.8397			0	0
Home 5	Control	2022-08-01					73.79	6.87	34.31	32.61	79	150	28	749	712	26200	2183.33	1611	572.333	26.2137			0	0
Home 5	Control	2022-09-01					83.82	7.65	43.56	32.61	81	167	57	951	712	26200	2183.33	1830	353.333	16.1832			0	0
Home 5	Control	2022-10-01					74.52	8.79	33.11	32.61	93	192	59	723	712	26200	2183.33	1627	556.333	25.4809			0	0
Home 5	Control	2022-11-01					71.82	10.12	29.08	32.61	91	221	61	635	712	26200	2183.33	1568	615.333	28.1832			0	0
Home 5	Control	2022-12-01					89.18	11.91	44.66	32.61	86	260	101	975	712	26200	2183.33	1947	236.333	10.8244			0	0
Home 5	Control	2023-01-01					85.36	10.29	43.01	32.06	78	235	85	982	732	27400	2283.33	1949	334.333	14.6423			0	0
Home 5	Control	2023-02-01					93.72	9.28	52.38	32.06	71	212	62	1196	732	27400	2283.33	2140	143.333	6.27737			0	0
Home 5	Control	2023-03-01					79.45	8.23	39.15	32.06	69	188	61	894	732	27400	2283.33	1814	469.333	20.5547			0	0
Home 5	Control	2023-04-01					74.98	7.18	35.74	32.06	67	164	44	816	732	27400	2283.33	1712	571.333	25.0219			0	0
Home 5	Control	2023-05-01					95.61	6.44	57.11	32.06	67	147	41	1304	732	27400	2283.33	2183	100.333	4.39416			0	0
Home 5	Control	2023-06-01					73.36	5.78	35.52	32.06	68	132	38	811	732	27400	2283.33	1675	608.333	26.6423			0	0
Home 5	Control	2023-07-01					72.48	5.56	34.86	32.06	69	127	42	796	732	27400	2283.33	1655	628.333	27.5182			0	0
Home 5	Control	2023-08-01					70.64	5.91	32.67	32.06	71	135	23	746	732	27400	2283.33	1613	670.333	29.3577			0	0
Home 5	Control	2023-09-01					66.39	6.66	27.68	32.06	71	152	69	632	732	27400	2283.33	1516	767.333	33.6058			0	0
Home 5	Control	2023-10-01					77.26	7.62	37.58	32.06	71	174	31	858	732	27400	2283.33	1764	519.333	22.7445			0	0
Home 5	Control	2023-11-01					71.69	8.67	30.96	32.06	73	198	60	707	732	27400	2283.33	1637	646.333	28.3066			0	0
Home 5	Control	2023-12-01					91.31	10.25	49.01	32.06	75	234	94	1119	732	27400	2283.33	2085	198.333	8.68613			0	0
Home 5	Control	2024-01-01					71.17	10.29	28.38	32.5	78	235	88	648	742	27400	2283.33	1625	658.333	28.8321			0	0
Home 5	Control	2024-02-01					76.99	9.64	34.86	32.5	80	220	65	796	742	27400	2283.33	1758	525.333	23.0073			0	0
Home 5	Control	2024-03-01					106.95	8.58	65.87	32.5	73	196	61	1504	742	27400	2283.33	2442	-158.667	-6.94891			0	0
Home 5	Control	2024-04-01					86.15	7.58	46.07	32.5	64	173	46	1052	742	27400	2283.33	1967	316.333	13.854			0	0
Home 5	Control	2024-05-01					83.87	6.79	44.58	32.5	64	155	37	1018	742	27400	2283.33	1915	368.333	16.1314			0	0
Home 5	Control	2024-06-01					71.56	6.09	32.98	32.5	60	139	43	753	742	27400	2283.33	1634	649.333	28.438			0	0
Home 5	Control	2024-07-01					81.07	5.91	42.66	32.5	88	135	33	974	742	27400	2283.33	1851	432.333	18.9343			0	0
Home 5	Control	2024-08-01					83.61	6.13	44.98	32.5	60	140	28	1027	742	27400	2283.33	1909	374.333	16.3942			0	0
Home 5	Control	2024-09-01					72.53	6.96	33.07	32.5	65	159	54	755	742	27400	2283.33	1656	627.333	27.4745			0	0
Home 5	Control	2024-10-01					85.18	7.97	44.72	32.5	75	182	60	1021	742	27400	2283.33	1945	338.333	14.8175			0	0
Home 5	Control	2024-11-01					96.35	9.11	54.74	32.5	64	208	83	1250	742	27400	2283.33	2200	83.3333	3.64964			0	0
Home 5	Control	2024-12-01					87.81	10.6	44.72	32.5	71	242	101	1021	742	27400	2283.33	2005	278.333	12.1898			0	0
Home 6	Control	2020-01-01					80.24	16.96	19.92	43.36	79	212	88	249	542	15000	1250	1003	247	19.76			0	0
Home 6	Control	2020-02-01					78.96	16.0	19.6	43.36	79	200	85	245	542	15000	1250	987	263	21.04			0	0
Home 6	Control	2020-03-01					81.2	14.16	23.68	43.36	79	177	91	296	542	15000	1250	1015	235	18.8			0	0
Home 6	Control	2020-04-01					74.24	12.4	18.48	43.36	77	155	72	231	542	15000	1250	928	322	25.76			0	0
Home 6	Control	2020-05-01					73.44	11.28	18.8	43.36	73	141	53	235	542	15000	1250	918	332	26.56			0	0
Home 6	Control	2020-06-01					72.56	10.0	19.2	43.36	69	125	43	240	542	15000	1250	907	343	27.44			0	0
Home 6	Control	2020-07-01					72.4	9.68	19.36	43.36	74	121	48	242	542	15000	1250	905	345	27.6			0	0
Home 6	Control	2020-08-01					68.48	10.16	14.96	43.36	79	127	38	187	542	15000	1250	856	394	31.52			0	0
Home 6	Control	2020-09-01					72.72	11.36	18.0	43.36	77	142	59	225	542	15000	1250	909	341	27.28			0	0
Home 6	Control	2020-10-01					76.48	13.2	19.92	43.36	72	165	66	249	542	15000	1250	956	294	23.52			0	0
Home 6	Control	2020-11-01					77.6	14.8	19.44	43.36	81	185	79	243	542	15000	1250	970	280	22.4			0	0
Home 6	Control	2020-12-01					79.92	17.52	19.04	43.36	83	219	129	238	542	15000	1250	999	251	20.08			0	0
Home 6	Control	2021-01-01					78.39	18.7	16.83	42.86	81	240	113	216	550	15400	1283.33	1006	277.333	21.6104			0	0
Home 6	Control	2021-02-01					78.7	18.39	17.45	42.86	85	236	105	224	550	15400	1283.33	1010	273.333	21.2987			0	0
Home 6	Control	2021-03-01					76.05	16.29	16.91	42.86	89	209	95	217	550	15400	1283.33	976	307.333	23.9481			0	0
Home 6	Control	2021-04-01					74.49	14.1	17.53	42.86	88	181	61	225	550	15400	1283.33	956	327.333	25.5065			0	0
Home 6	Control	2021-05-01					73.32	12.7	17.77	42.86	78	163	57	228	550	15400	1283.33	941	342.333	26.6753			0	0
Home 6	Control	2021-06-01					75.35	11.38	21.12	42.86	73	146	38	271	550	15400	1283.33	967	316.333	24.6494			0	0
Home 6	Control	2021-07-01					75.43	10.91	21.66	42.86	82	140	38	278	550	15400	1283.33	968	315.333	24.5714			0	0
Home 6	Control	2021-08-01					75.9	11.61	21.43	42.86	80	149	38	275	550	15400	1283.33	974	309.333	24.1039			0	0
Home 6	Control	2021-09-01					75.82	12.94	20.03	42.86	84	166	51	257	550	15400	1283.33	973	310.333	24.1818			0	0
Home 6	Control	2021-10-01					75.27	15.12	17.3	42.86	86	194	73	222	550	15400	1283.33	966	317.333	24.7273			0	0
Home 6	Control	2021-11-01					81.19	17.06	21.27	42.86	87	219	68	273	550	15400	1283.33	1042	241.333	18.8052			0	0
Home 6	Control	2021-12-01					82.52	19.95	19.71	42.86	87	256	146	253	550	15400	1283.33	1059	224.333	17.4805			0	0
Home 6	Control	2022-01-01					85.76	20.25	22.17	43.34	86	265	94	290	567	15700	1308.33	1122	186.333	14.242			0	0
Home 6	Control	2022-02-01					88.43	19.18	25.91	43.34	77	251	82	339	567	15700	1308.33	1157	151.333	11.5669			0	0
Home 6	Control	2022-03-01					83.16	17.04	22.78	43.34	81	223	107	298	567	15700	1308.33	1088	220.333	16.8408			0	0
Home 6	Control	2022-04-01					81.55	14.98	23.24	43.34	78	196	81	304	567	15700	1308.33	1067	241.333	18.4459			0	0
Home 6	Control	2022-05-01					76.2	13.45	19.41	43.34	75	176	65	254	567	15700	1308.33	997	311.333	23.7962			0	0
Home 6	Control	2022-06-01					79.8	12.08	24.38	43.34	78	158	51	319	567	15700	1308.33	1044	264.333	20.2038			0	0
Home 6	Control	2022-07-01					75.59	11.62	20.64	43.34	72	152	41	270	567	15700	1308.33	989	319.333	24.4076			0	0
Home 6	Control	2022-08-01					81.86	12.31	26.22	43.34	86	161	39	343	567	15700	1308.33	1071	237.333	18.1401			0	0
Home 6	Control	2022-09-01					79.64	13.83	22.47	43.34	78	181	59	294	567	15700	1308.33	1042	266.333	20.3567			0	0
Home 6	Control	2022-10-01					76.66	15.9	17.43	43.34	85	208	66	228	567	15700	1308.33	1003	305.333	23.3376			0	0
Home 6	Control	2022-11-01					83.16	17.81	22.01	43.34	85	233	108	288	567	15700	1308.33	1088	220.333	16.8408			0	0
Home 6	Control	2022-12-01					88.59	21.17	24.08	43.34	90	277	112	315	567	15700	1308.33	1159	149.333	11.414			0	0
Home 6	Control	2023-01-01					88.75	17.96	26.87	43.92	81	238	104	356	582	15900	1325	1176	149	11.2453			0	0
Home 6	Control	2023-02-01					87.32	15.62	27.77	43.92	77	207	107	368	582	15900	1325	1157	168	12.6792			0	0
Home 6	Control	2023-03-01					81.51	13.96	23.62	43.92	75	185	109	313	582	15900	1325	1080	245	18.4906			0	0
Home 6	Control	2023-04-01					86.26	12.23	30.11	43.92	74	162	69	399	582	15900	1325	1143	182	13.7358			0	0
Home 6	Control	2023-05-01					69.28	10.87	14.49	43.92	72	144	52	192	582	15900	1325	918	407	30.717			0	0
Home 6	Control	2023-06-01					76.15	9.74	22.49	43.92	73	129	54	298	582	15900	1325	1009	316	23.8491			0	0
Home 6	Control	2023-07-01					74.57	9.51	21.13	43.92	75	126	49	280	582	15900	1325	988	337	25.434			0	0
Home 6	Control	2023-08-01					74.49	9.96	20.6	43.92	76	132	45	273	582	15900	1325	987	338	25.5094			0	0
Home 6	Control	2023-09-01					85.58	11.25	30.42	43.92	76	149	58	403	582	15900	1325	1134	191	14.4151			0	0
Home 6	Control	2023-10-01					86.26	12.91	29.43	43.92	77	171	90	390	582	15900	1325	1143	182	13.7358			0	0
Home 6	Control	2023-11-01					80.91	14.72	22.26	43.92	79	195	72	295	582	15900	1325	1072	253	19.0943			0	0
Home 6	Control	2023-12-01					95.17	17.13	34.11	43.92	81	227	91	452	582	15900	1325	1261	64	4.83019			0	0
Home 6	Control	2024-01-01					81.28	17.15	20.54	43.58	76	233	93	279	592	16300	1358.33	1104	254.333	18.7239			0	0
Home 6	Control	2024-02-01					78.7	16.42	18.7	43.58	84	223	96	254	592	16300	1358.33	1069	289.333	21.3006			0	0
Home 6	Control	2024-03-01					76.2	14.5	18.11	43.58	86	197	91	246	592	16300	1358.33	1035	323.333	23.8037			0	0
Home 6	Control	2024-04-01					74.28	12.81	17.89	43.58	73	174	100	243	592	16300	1358.33	1009	349.333	25.7178			0	0
Home 6	Control	2024-05-01					77.82	11.41	22.82	43.58	66	155	70	310	592	16300	1358.33	1057	301.333	22.184			0	0
Home 6	Control	2024-06-01					77.3	10.16	23.56	43.58	83	138	42	320	592	16300	1358.33	1050	308.333	22.6994			0	0
Home 6	Control	2024-07-01					75.53	9.87	22.09	43.58	70	134	40	300	592	16300	1358.33	1026	332.333	24.4663			0	0
Home 6	Control	2024-08-01					68.69	10.45	14.65	43.58	71	142	34	199	592	16300	1358.33	933	425.333	31.3129			0	0
Home 6	Control	2024-09-01					77.15	11.48	22.09	43.58	74	156	56	300	592	16300	1358.33	1048	310.333	22.8466			0	0
Home 6	Control	2024-10-01					79.95	13.4	22.97	43.58	68	182	67	312	592	16300	1358.33	1086	272.333	20.0491			0	0
Home 6	Control	2024-11-01					77.45	15.31	18.55	43.58	78	208	97	252	592	16300	1358.33	1052	306.333	22.5521			0	0
Home 6	Control	2024-12-01					84.07	17.74	22.75	43.58	81	241	91	309	592	16300	1358.33	1142	216.333	15.9264			0	0
Home 7	Subsidy	2020-01-01	2022/2023	April and October	2022-04-01	2023-10-01	57.44	3.84	15.98	37.62	145	57	67	237	558	17800	1483.33	852	631.333	42.5618	-27.0	-45.0	0	0
Home 7	Subsidy	2020-02-01	2022/2023	April and October	2022-04-01	2023-10-01	56.49	3.57	15.3	37.62	143	53	74	227	558	17800	1483.33	838	645.333	43.5056	-26.0	-44.0	0	0
Home 7	Subsidy	2020-03-01	2022/2023	April and October	2022-04-01	2023-10-01	57.51	3.24	16.65	37.62	140	48	47	247	558	17800	1483.33	853	630.333	42.4944	-25.0	-43.0	0	0
Home 7	Subsidy	2020-04-01	2022/2023	April and October	2022-04-01	2023-10-01	56.97	2.83	16.52	37.62	132	42	41	245	558	17800	1483.33	845	638.333	43.0337	-24.0	-42.0	0	0
Home 7	Subsidy	2020-05-01	2022/2023	April and October	2022-04-01	2023-10-01	52.38	2.49	12.27	37.62	144	37	36	182	558	17800	1483.33	777	706.333	47.618	-23.0	-41.0	0	0
Home 7	Subsidy	2020-06-01	2022/2023	April and October	2022-04-01	2023-10-01	56.63	2.22	16.79	37.62	136	33	23	249	558	17800	1483.33	840	643.333	43.3708	-22.0	-40.0	0	0
Home 7	Subsidy	2020-07-01	2022/2023	April and October	2022-04-01	2023-10-01	57.51	2.16	17.73	37.62	145	32	24	263	558	17800	1483.33	853	630.333	42.4944	-21.0	-39.0	0	0
Home 7	Subsidy	2020-08-01	2022/2023	April and October	2022-04-01	2023-10-01	55.82	2.29	15.91	37.62	128	34	25	236	558	17800	1483.33	828	655.333	44.1798	-20.0	-38.0	0	0
Home 7	Subsidy	2020-09-01	2022/2023	April and October	2022-04-01	2023-10-01	58.52	2.56	18.34	37.62	152	38	32	272	558	17800	1483.33	868	615.333	41.4831	-19.0	-37.0	0	0
Home 7	Subsidy	2020-10-01	2022/2023	April and October	2022-04-01	2023-10-01	56.43	2.9	15.91	37.62	153	43	35	236	558	17800	1483.33	837	646.333	43.573	-18.0	-36.0	0	0
Home 7	Subsidy	2020-11-01	2022/2023	April and October	2022-04-01	2023-10-01	58.85	3.37	17.87	37.62	141	50	50	265	558	17800	1483.33	873	610.333	41.1461	-17.0	-35.0	0	0
Home 7	Subsidy	2020-12-01	2022/2023	April and October	2022-04-01	2023-10-01	64.65	3.98	23.06	37.62	140	59	70	342	558	17800	1483.33	959	524.333	35.3483	-16.0	-34.0	0	0
Home 7	Subsidy	2021-01-01	2022/2023	April and October	2022-04-01	2023-10-01	58.8	4.07	16.67	38.07	185	61	83	250	571	18000	1500	882	618	41.2	-15.0	-33.0	0	0
Home 7	Subsidy	2021-02-01	2022/2023	April and October	2022-04-01	2023-10-01	55.27	3.87	13.33	38.07	151	58	68	200	571	18000	1500	829	671	44.7333	-14.0	-32.0	0	0
Home 7	Subsidy	2021-03-01	2022/2023	April and October	2022-04-01	2023-10-01	58.0	3.47	16.47	38.07	166	52	72	247	571	18000	1500	870	630	42	-13.0	-31.0	0	0
Home 7	Subsidy	2021-04-01	2022/2023	April and October	2022-04-01	2023-10-01	55.07	3.07	13.93	38.07	169	46	34	209	571	18000	1500	826	674	44.9333	-12.0	-30.0	0	0
Home 7	Subsidy	2021-05-01	2022/2023	April and October	2022-04-01	2023-10-01	59.6	2.67	18.87	38.07	161	40	39	283	571	18000	1500	894	606	40.4	-11.0	-29.0	0	0
Home 7	Subsidy	2021-06-01	2022/2023	April and October	2022-04-01	2023-10-01	61.0	2.4	20.53	38.07	145	36	26	308	571	18000	1500	915	585	39	-10.0	-28.0	0	0
Home 7	Subsidy	2021-07-01	2022/2023	April and October	2022-04-01	2023-10-01	59.67	2.33	19.27	38.07	162	35	35	289	571	18000	1500	895	605	40.3333	-9.0	-27.0	0	0
Home 7	Subsidy	2021-08-01	2022/2023	April and October	2022-04-01	2023-10-01	58.93	2.47	18.4	38.07	149	37	22	276	571	18000	1500	884	616	41.0667	-8.0	-26.0	0	0
Home 7	Subsidy	2021-09-01	2022/2023	April and October	2022-04-01	2023-10-01	57.0	2.73	16.2	38.07	170	41	28	243	571	18000	1500	855	645	43	-7.0	-25.0	0	0
Home 7	Subsidy	2021-10-01	2022/2023	April and October	2022-04-01	2023-10-01	62.2	3.2	20.93	38.07	164	48	38	314	571	18000	1500	933	567	37.8	-6.0	-24.0	0	0
Home 7	Subsidy	2021-11-01	2022/2023	April and October	2022-04-01	2023-10-01	60.87	3.6	19.2	38.07	171	54	35	288	571	18000	1500	913	587	39.1333	-5.0	-23.0	0	0
Home 7	Subsidy	2021-12-01	2022/2023	April and October	2022-04-01	2023-10-01	61.87	4.27	19.53	38.07	166	64	59	293	571	18000	1500	928	572	38.1333	-4.0	-22.0	0	0
Home 7	Subsidy	2022-01-01	2022/2023	April and October	2022-04-01	2023-10-01	56.47	5.82	16.71	33.94	215	99	60	284	577	20400	1700	960	740	43.5294	-3.0	-21.0	0	0
Home 7	Subsidy	2022-02-01	2022/2023	April and October	2022-04-01	2023-10-01	56.88	6.41	16.53	33.94	197	109	67	281	577	20400	1700	967	733	43.1176	-2.0	-20.0	0	0
Home 7	Subsidy	2022-03-01	2022/2023	April and October	2022-04-01	2023-10-01	57.24	5.71	17.59	33.94	185	97	58	299	577	20400	1700	973	727	42.7647	-1.0	-19.0	0	0
Home 7	Subsidy	2022-04-01	2022/2023	April and October	2022-04-01	2023-10-01	57.41	4.35	19.12	33.94	186	74	54	325	577	20400	1700	976	724	42.5882	0.0	-18.0	1	0
Home 7	Subsidy	2022-05-01	2022/2023	April and October	2022-04-01	2023-10-01	58.47	4.12	20.41	33.94	219	70	40	347	577	20400	1700	994	706	41.5294	1.0	-17.0	1	0
Home 7	Subsidy	2022-06-01	2022/2023	April and October	2022-04-01	2023-10-01	55.06	3.82	17.29	33.94	189	65	25	294	577	20400	1700	936	764	44.9412	2.0	-16.0	1	0
Home 7	Subsidy	2022-07-01	2022/2023	April and October	2022-04-01	2023-10-01	56.24	3.88	18.41	33.94	202	66	22	313	577	20400	1700	956	744	43.7647	3.0	-15.0	1	0
Home 7	Subsidy	2022-08-01	2022/2023	April and October	2022-04-01	2023-10-01	54.35	4.12	16.29	33.94	161	70	32	277	577	20400	1700	924	776	45.6471	4.0	-14.0	1	0
Home 7	Subsidy	2022-09-01	2022/2023	April and October	2022-04-01	2023-10-01	56.29	4.59	17.76	33.94	187	78	29	302	577	20400	1700	957	743	43.7059	5.0	-13.0	1	0
Home 7	Subsidy	2022-10-01	2022/2023	April and October	2022-04-01	2023-10-01	52.06	5.29	12.82	33.94	178	90	66	218	577	20400	1700	885	815	47.9412	6.0	-12.0	1	0
Home 7	Subsidy	2022-11-01	2022/2023	April and October	2022-04-01	2023-10-01	54.76	5.94	14.88	33.94	190	101	70	253	577	20400	1700	931	769	45.2353	7.0	-11.0	1	0
Home 7	Subsidy	2022-12-01	2022/2023	April and October	2022-04-01	2023-10-01	59.29	7.12	18.24	33.94	191	121	68	310	577	20400	1700	1008	692	40.7059	8.0	-10.0	1	0
Home 7	Subsidy	2023-01-01	2022/2023	April and October	2022-04-01	2023-10-01	46.51	6.37	12.11	28.04	207	120	51	228	528	22600	1883.33	876	1007.33	53.4867	9.0	-9.0	1	0
Home 7	Subsidy	2023-02-01	2022/2023	April and October	2022-04-01	2023-10-01	57.82	5.95	23.84	28.04	202	112	103	449	528	22600	1883.33	1089	794.333	42.177	10.0	-8.0	1	0
Home 7	Subsidy	2023-03-01	2022/2023	April and October	2022-04-01	2023-10-01	44.97	5.31	11.63	28.04	196	100	60	219	528	22600	1883.33	847	1036.33	55.0265	11.0	-7.0	1	0
Home 7	Subsidy	2023-04-01	2022/2023	April and October	2022-04-01	2023-10-01	49.43	4.67	16.73	28.04	194	88	69	315	528	22600	1883.33	931	952.333	50.5664	12.0	-6.0	1	0
Home 7	Subsidy	2023-05-01	2022/2023	April and October	2022-04-01	2023-10-01	53.73	4.14	21.56	28.04	190	78	27	406	528	22600	1883.33	1012	871.333	46.2655	13.0	-5.0	1	0
Home 7	Subsidy	2023-06-01	2022/2023	April and October	2022-04-01	2023-10-01	49.22	3.72	17.47	28.04	192	70	27	329	528	22600	1883.33	927	956.333	50.7788	14.0	-4.0	1	0
Home 7	Subsidy	2023-07-01	2022/2023	April and October	2022-04-01	2023-10-01	46.88	3.56	15.29	28.04	195	67	29	288	528	22600	1883.33	883	1000.33	53.115	15.0	-3.0	1	0
Home 7	Subsidy	2023-08-01	2022/2023	April and October	2022-04-01	2023-10-01	46.51	3.82	14.65	28.04	200	72	33	276	528	22600	1883.33	876	1007.33	53.4867	16.0	-2.0	1	0
Home 7	Subsidy	2023-09-01	2022/2023	April and October	2022-04-01	2023-10-01	50.39	4.3	18.05	28.04	200	81	37	340	528	22600	1883.33	949	934.333	49.6106	17.0	-1.0	1	0
Home 7	Subsidy	2023-10-01	2022/2023	April and October	2022-04-01	2023-10-01	48.27	4.35	15.88	28.04	179	82	71	299	528	22600	1883.33	909	974.333	51.7345	18.0	0.0	1	1
Home 7	Subsidy	2023-11-01	2022/2023	April and October	2022-04-01	2023-10-01	48.85	5.15	15.66	28.04	190	97	46	295	528	22600	1883.33	920	963.333	51.1504	19.0	1.0	1	1
Home 7	Subsidy	2023-12-01	2022/2023	April and October	2022-04-01	2023-10-01	53.89	6.32	19.54	28.04	204	119	77	368	528	22600	1883.33	1015	868.333	46.1062	20.0	2.0	1	1
Home 7	Subsidy	2024-01-01	2022/2023	April and October	2022-04-01	2023-10-01	42.06	5.72	16.44	19.89	187	103	67	296	358	21600	1800	757	1043	57.9444	21.0	3.0	1	1
Home 7	Subsidy	2024-02-01	2022/2023	April and October	2022-04-01	2023-10-01	42.5	4.94	17.67	19.89	170	89	63	318	358	21600	1800	765	1035	57.5	22.0	4.0	1	1
Home 7	Subsidy	2024-03-01	2022/2023	April and October	2022-04-01	2023-10-01	41.06	4.39	16.78	19.89	135	79	55	302	358	21600	1800	739	1061	58.9444	23.0	5.0	1	1
Home 7	Subsidy	2024-04-01	2022/2023	April and October	2022-04-01	2023-10-01	38.67	3.89	14.89	19.89	135	70	29	268	358	21600	1800	696	1104	61.3333	24.0	6.0	1	1
Home 7	Subsidy	2024-05-01	2022/2023	April and October	2022-04-01	2023-10-01	45.72	3.44	22.39	19.89	151	62	21	403	358	21600	1800	823	977	54.2778	25.0	7.0	1	1
Home 7	Subsidy	2024-06-01	2022/2023	April and October	2022-04-01	2023-10-01	46.22	3.11	23.22	19.89	161	56	34	418	358	21600	1800	832	968	53.7778	26.0	8.0	1	1
Home 7	Subsidy	2024-07-01	2022/2023	April and October	2022-04-01	2023-10-01	40.11	3.0	17.22	19.89	165	54	24	310	358	21600	1800	722	1078	59.8889	27.0	9.0	1	1
Home 7	Subsidy	2024-08-01	2022/2023	April and October	2022-04-01	2023-10-01	40.44	3.17	17.39	19.89	157	57	20	313	358	21600	1800	728	1072	59.5556	28.0	10.0	1	1
Home 7	Subsidy	2024-09-01	2022/2023	April and October	2022-04-01	2023-10-01	40.94	3.56	17.5	19.89	191	64	46	315	358	21600	1800	737	1063	59.0556	29.0	11.0	1	1
Home 7	Subsidy	2024-10-01	2022/2023	April and October	2022-04-01	2023-10-01	43.67	4.06	19.72	19.89	159	73	41	355	358	21600	1800	786	1014	56.3333	30.0	12.0	1	1
Home 7	Subsidy	2024-11-01	2022/2023	April and October	2022-04-01	2023-10-01	39.83	4.61	15.33	19.89	142	83	66	276	358	21600	1800	717	1083	60.1667	31.0	13.0	1	1
Home 7	Subsidy	2024-12-01	2022/2023	April and October	2022-04-01	2023-10-01	44.56	5.5	19.17	19.89	139	99	64	345	358	21600	1800	802	998	55.4444	32.0	14.0	1	1
Home 8	Control	2020-01-01					92.33	12.99	22.87	56.47	165	92	101	162	400	8500	708.333	654	54.3333	7.67059			0	0
Home 8	Control	2020-02-01					87.67	12.42	18.78	56.47	162	88	90	133	400	8500	708.333	621	87.3333	12.3294			0	0
Home 8	Control	2020-03-01					88.94	11.01	21.46	56.47	180	78	52	152	400	8500	708.333	630	78.3333	11.0588			0	0
Home 8	Control	2020-04-01					92.89	9.6	26.82	56.47	182	68	53	190	400	8500	708.333	658	50.3333	7.10588			0	0
Home 8	Control	2020-05-01					90.35	8.47	25.41	56.47	165	60	40	180	400	8500	708.333	640	68.3333	9.64706			0	0
Home 8	Control	2020-06-01					88.66	7.76	24.42	56.47	179	55	36	173	400	8500	708.333	628	80.3333	11.3412			0	0
Home 8	Control	2020-07-01					87.25	7.34	23.44	56.47	161	52	21	166	400	8500	708.333	618	90.3333	12.7529			0	0
Home 8	Control	2020-08-01					89.36	7.76	25.13	56.47	169	55	32	178	400	8500	708.333	633	75.3333	10.6353			0	0
Home 8	Control	2020-09-01					85.84	8.75	20.61	56.47	152	62	44	146	400	8500	708.333	608	100.333	14.1647			0	0
Home 8	Control	2020-10-01					85.41	10.02	18.92	56.47	179	71	34	134	400	8500	708.333	605	103.333	14.5882			0	0
Home 8	Control	2020-11-01					89.93	11.44	22.02	56.47	168	81	46	156	400	8500	708.333	637	71.3333	10.0706			0	0
Home 8	Control	2020-12-01					96.42	13.41	26.54	56.47	189	95	50	188	400	8500	708.333	683	25.3333	3.57647			0	0
Home 8	Control	2021-01-01					96.81	15.37	27.51	53.93	227	114	75	204	400	8900	741.667	718	23.6667	3.19101			0	0
Home 8	Control	2021-02-01					100.31	15.78	30.61	53.93	212	117	85	227	400	8900	741.667	744	-2.33333	-0.314607			0	0
Home 8	Control	2021-03-01					96.67	13.89	28.85	53.93	212	103	80	214	400	8900	741.667	717	24.6667	3.32584			0	0
Home 8	Control	2021-04-01					94.11	12.27	27.91	53.93	198	91	51	207	400	8900	741.667	698	43.6667	5.88764			0	0
Home 8	Control	2021-05-01					97.89	10.79	33.17	53.93	203	80	56	246	400	8900	741.667	726	15.6667	2.11236			0	0
Home 8	Control	2021-06-01					96.0	9.71	32.36	53.93	214	72	25	240	400	8900	741.667	712	29.6667	4			0	0
Home 8	Control	2021-07-01					91.42	9.3	28.18	53.93	192	69	22	209	400	8900	741.667	678	63.6667	8.58427			0	0
Home 8	Control	2021-08-01					88.85	9.98	24.94	53.93	196	74	32	185	400	8900	741.667	659	82.6667	11.1461			0	0
Home 8	Control	2021-09-01					90.34	11.06	25.35	53.93	179	82	45	188	400	8900	741.667	670	71.6667	9.66292			0	0
Home 8	Control	2021-10-01					94.11	12.67	27.51	53.93	208	94	52	204	400	8900	741.667	698	43.6667	5.88764			0	0
Home 8	Control	2021-11-01					95.6	14.56	27.1	53.93	198	108	45	201	400	8900	741.667	709	32.6667	4.40449			0	0
Home 8	Control	2021-12-01					108.4	17.26	37.21	53.93	211	128	82	276	400	8900	741.667	804	-62.3333	-8.40449			0	0
Home 8	Control	2022-01-01					92.08	19.47	23.63	48.98	251	159	70	193	400	9800	816.667	752	64.6667	7.91837			0	0
Home 8	Control	2022-02-01					97.59	19.96	28.65	48.98	219	163	93	234	400	9800	816.667	797	19.6667	2.40816			0	0
Home 8	Control	2022-03-01					92.57	17.63	25.96	48.98	247	144	73	212	400	9800	816.667	756	60.6667	7.42857			0	0
Home 8	Control	2022-04-01					94.65	15.8	29.88	48.98	232	129	48	244	400	9800	816.667	773	43.6667	5.34694			0	0
Home 8	Control	2022-05-01					94.29	13.84	31.47	48.98	236	113	41	257	400	9800	816.667	770	46.6667	5.71429			0	0
Home 8	Control	2022-06-01					90.12	12.49	28.65	48.98	214	102	30	234	400	9800	816.667	736	80.6667	9.87755			0	0
Home 8	Control	2022-07-01					93.55	12.12	32.45	48.98	238	99	32	265	400	9800	816.667	764	52.6667	6.44898			0	0
Home 8	Control	2022-08-01					91.35	12.73	29.63	48.98	230	104	43	242	400	9800	816.667	746	70.6667	8.65306			0	0
Home 8	Control	2022-09-01					92.82	14.33	29.51	48.98	221	117	39	241	400	9800	816.667	758	58.6667	7.18367			0	0
Home 8	Control	2022-10-01					93.92	16.53	28.41	48.98	217	135	65	232	400	9800	816.667	767	49.6667	6.08163			0	0
Home 8	Control	2022-11-01					100.29	18.73	32.57	48.98	233	153	66	266	400	9800	816.667	819	-2.33333	-0.285714			0	0
Home 8	Control	2022-12-01					103.84	21.8	33.06	48.98	262	178	80	270	400	9800	816.667	848	-31.3333	-3.83673			0	0
Home 8	Control	2023-01-01					109.06	23.88	38.12	47.06	256	203	75	324	400	10200	850	927	-77	-9.05882			0	0
Home 8	Control	2023-02-01					107.06	23.88	36.12	47.06	255	203	52	307	400	10200	850	910	-60	-7.05882			0	0
Home 8	Control	2023-03-01					100.47	21.06	32.35	47.06	247	179	49	275	400	10200	850	854	-4	-0.470588			0	0
Home 8	Control	2023-04-01					85.41	18.47	19.88	47.06	242	157	34	169	400	10200	850	726	124	14.5882			0	0
Home 8	Control	2023-05-01					86.35	16.47	22.82	47.06	239	140	61	194	400	10200	850	734	116	13.6471			0	0
Home 8	Control	2023-06-01					97.29	14.59	35.65	47.06	240	124	29	303	400	10200	850	827	23	2.70588			0	0
Home 8	Control	2023-07-01					88.94	14.24	27.65	47.06	246	121	22	235	400	10200	850	756	94	11.0588			0	0
Home 8	Control	2023-08-01					93.53	14.94	31.53	47.06	250	127	30	268	400	10200	850	795	55	6.47059			0	0
Home 8	Control	2023-09-01					90.47	16.71	26.71	47.06	248	142	36	227	400	10200	850	769	81	9.52941			0	0
Home 8	Control	2023-10-01					98.82	19.29	32.47	47.06	253	164	45	276	400	10200	850	840	10	1.17647			0	0
Home 8	Control	2023-11-01					104.47	21.88	35.53	47.06	257	186	68	302	400	10200	850	888	-38	-4.47059			0	0
Home 8	Control	2023-12-01					98.82	25.88	25.88	47.06	265	220	89	220	400	10200	850	840	10	1.17647			0	0
Home 8	Control	2024-01-01					87.16	20.63	24.42	42.11	265	196	60	232	400	11400	950	828	122	12.8421			0	0
Home 8	Control	2024-02-01					81.47	18.42	20.95	42.11	203	175	55	199	400	11400	950	774	176	18.5263			0	0
Home 8	Control	2024-03-01					88.42	16.32	30.0	42.11	241	155	51	285	400	11400	950	840	110	11.5789			0	0
Home 8	Control	2024-04-01					77.79	14.32	21.37	42.11	241	136	24	203	400	11400	950	739	211	22.2105			0	0
Home 8	Control	2024-05-01					82.42	12.84	27.47	42.11	286	122	25	261	400	11400	950	783	167	17.5789			0	0
Home 8	Control	2024-06-01					85.68	11.37	32.21	42.11	264	108	40	306	400	11400	950	814	136	14.3158			0	0
Home 8	Control	2024-07-01					96.11	11.05	42.95	42.11	229	105	39	408	400	11400	950	913	37	3.89474			0	0
Home 8	Control	2024-08-01					85.37	11.58	31.68	42.11	240	110	27	301	400	11400	950	811	139	14.6316			0	0
Home 8	Control	2024-09-01					91.89	12.95	36.84	42.11	211	123	41	350	400	11400	950	873	77	8.10526			0	0
Home 8	Control	2024-10-01					87.58	14.95	30.53	42.11	190	142	50	290	400	11400	950	832	118	12.4211			0	0
Home 8	Control	2024-11-01					90.21	17.05	31.05	42.11	243	162	123	295	400	11400	950	857	93	9.78947			0	0
Home 8	Control	2024-12-01					92.95	20.32	30.53	42.11	288	193	96	290	400	11400	950	883	67	7.05263			0	0
Home 9	Control	2020-01-01					69.19	11.53	17.44	40.22	200	123	48	186	429	12800	1066.67	738	328.667	30.8125			0	0
Home 9	Control	2020-02-01					72.66	10.78	21.66	40.22	188	115	38	231	429	12800	1066.67	775	291.667	27.3438			0	0
Home 9	Control	2020-03-01					70.03	9.47	20.34	40.22	206	101	28	217	429	12800	1066.67	747	319.667	29.9688			0	0
Home 9	Control	2020-04-01					72.66	8.44	24.0	40.22	207	90	32	256	429	12800	1066.67	775	291.667	27.3438			0	0
Home 9	Control	2020-05-01					68.53	7.59	20.72	40.22	169	81	23	221	429	12800	1066.67	731	335.667	31.4688			0	0
Home 9	Control	2020-06-01					67.78	6.75	20.81	40.22	180	72	15	222	429	12800	1066.67	723	343.667	32.2188			0	0
Home 9	Control	2020-07-01					70.03	6.56	23.25	40.22	176	70	16	248	429	12800	1066.67	747	319.667	29.9688			0	0
Home 9	Control	2020-08-01					74.44	6.84	27.38	40.22	184	73	16	292	429	12800	1066.67	794	272.667	25.5625			0	0
Home 9	Control	2020-09-01					67.31	7.69	19.41	40.22	183	82	34	207	429	12800	1066.67	718	348.667	32.6875			0	0
Home 9	Control	2020-10-01					73.78	8.91	24.66	40.22	227	95	39	263	429	12800	1066.67	787	279.667	26.2188			0	0
Home 9	Control	2020-11-01					74.72	9.94	24.56	40.22	195	106	39	262	429	12800	1066.67	797	269.667	25.2812			0	0
Home 9	Control	2020-12-01					75.28	11.91	23.16	40.22	206	127	67	247	429	12800	1066.67	803	263.667	24.7188			0	0
Home 9	Control	2021-01-01					77.4	13.83	23.27	40.31	219	151	49	254	440	13100	1091.67	845	246.667	22.5954			0	0
Home 9	Control	2021-02-01					75.21	14.2	20.7	40.31	199	155	38	226	440	13100	1091.67	821	270.667	24.7939			0	0
Home 9	Control	2021-03-01					82.08	12.64	29.13	40.31	216	138	50	318	440	13100	1091.67	896	195.667	17.9237			0	0
Home 9	Control	2021-04-01					73.01	11.08	21.62	40.31	186	121	34	236	440	13100	1091.67	797	294.667	26.9924			0	0
Home 9	Control	2021-05-01					72.73	9.89	22.53	40.31	224	108	21	246	440	13100	1091.67	794	297.667	27.2672			0	0
Home 9	Control	2021-06-01					70.72	8.89	21.53	40.31	209	97	19	235	440	13100	1091.67	772	319.667	29.2824			0	0
Home 9	Control	2021-07-01					67.24	8.52	18.41	40.31	191	93	15	201	440	13100	1091.67	734	357.667	32.7634			0	0
Home 9	Control	2021-08-01					71.18	8.98	21.89	40.31	198	98	15	239	440	13100	1091.67	777	314.667	28.8244			0	0
Home 9	Control	2021-09-01					73.28	9.98	22.99	40.31	218	109	30	251	440	13100	1091.67	800	291.667	26.7176			0	0
Home 9	Control	2021-10-01					78.41	11.63	26.47	40.31	213	127	45	289	440	13100	1091.67	856	235.667	21.5878			0	0
Home 9	Control	2021-11-01					77.31	13.28	23.73	40.31	194	145	31	259	440	13100	1091.67	844	247.667	22.687			0	0
Home 9	Control	2021-12-01					79.33	15.48	23.54	40.31	223	169	55	257	440	13100	1091.67	866	225.667	20.6718			0	0
Home 9	Control	2022-01-01					77.88	14.87	23.19	39.82	220	168	52	262	450	13560	1130	880	250	22.1239			0	0
Home 9	Control	2022-02-01					77.7	13.89	23.98	39.82	178	157	50	271	450	13560	1130	878	252	22.3009			0	0
Home 9	Control	2022-03-01					74.69	12.39	22.48	39.82	204	140	41	254	450	13560	1130	844	286	25.3097			0	0
Home 9	Control	2022-04-01					76.02	10.71	25.49	39.82	184	121	32	288	450	13560	1130	859	271	23.9823			0	0
Home 9	Control	2022-05-01					78.58	9.65	29.12	39.82	207	109	31	329	450	13560	1130	888	242	21.4159			0	0
Home 9	Control	2022-06-01					71.5	8.76	22.92	39.82	183	99	21	259	450	13560	1130	808	322	28.4956			0	0
Home 9	Control	2022-07-01					76.11	8.32	27.96	39.82	182	94	22	316	450	13560	1130	860	270	23.8938			0	0
Home 9	Control	2022-08-01					75.58	8.85	26.9	39.82	200	100	24	304	450	13560	1130	854	276	24.4248			0	0
Home 9	Control	2022-09-01					75.22	9.82	25.58	39.82	185	111	29	289	450	13560	1130	850	280	24.7788			0	0
Home 9	Control	2022-10-01					75.31	11.42	24.07	39.82	200	129	33	272	450	13560	1130	851	279	24.6903			0	0
Home 9	Control	2022-11-01					77.7	12.92	24.96	39.82	207	146	43	282	450	13560	1130	878	252	22.3009			0	0
Home 9	Control	2022-12-01					80.35	15.31	25.22	39.82	207	173	70	285	450	13560	1130	908	222	19.646			0	0
Home 9	Control	2023-01-01					83.36	13.76	32.24	37.36	209	172	66	403	467	15000	1250	1042	208	16.64			0	0
Home 9	Control	2023-02-01					70.64	12.96	20.32	37.36	206	162	41	254	467	15000	1250	883	367	29.36			0	0
Home 9	Control	2023-03-01					77.76	11.44	28.96	37.36	199	143	44	362	467	15000	1250	972	278	22.24			0	0
Home 9	Control	2023-04-01					78.56	10.0	31.2	37.36	195	125	43	390	467	15000	1250	982	268	21.44			0	0
Home 9	Control	2023-05-01					69.04	8.96	22.72	37.36	193	112	19	284	467	15000	1250	863	387	30.96			0	0
Home 9	Control	2023-06-01					75.12	8.0	29.76	37.36	195	100	26	372	467	15000	1250	939	311	24.88			0	0
Home 9	Control	2023-07-01					70.08	7.76	24.96	37.36	198	97	17	312	467	15000	1250	876	374	29.92			0	0
Home 9	Control	2023-08-01					70.16	8.16	24.64	37.36	203	102	26	308	467	15000	1250	877	373	29.84			0	0
Home 9	Control	2023-09-01					70.24	9.12	23.76	37.36	201	114	24	297	467	15000	1250	878	372	29.76			0	0
Home 9	Control	2023-10-01					65.76	10.56	17.84	37.36	205	132	24	223	467	15000	1250	822	428	34.24			0	0
Home 9	Control	2023-11-01					76.08	12.08	26.64	37.36	210	151	31	333	467	15000	1250	951	299	23.92			0	0
Home 9	Control	2023-12-01					85.28	14.24	33.68	37.36	217	178	60	421	467	15000	1250	1066	184	14.72			0	0
Home 9	Control	2024-01-01					71.54	14.9	19.64	36.99	191	195	63	257	484	15700	1308.33	936	372.333	28.4586			0	0
Home 9	Control	2024-02-01					77.66	14.75	25.91	36.99	198	193	44	339	484	15700	1308.33	1016	292.333	22.3439			0	0
Home 9	Control	2024-03-01					72.23	12.84	22.39	36.99	212	168	53	293	484	15700	1308.33	945	363.333	27.7707			0	0
Home 9	Control	2024-04-01					66.96	11.31	18.65	36.99	170	148	24	244	484	15700	1308.33	876	432.333	33.0446			0	0
Home 9	Control	2024-05-01					74.9	10.17	27.75	36.99	205	133	30	363	484	15700	1308.33	980	328.333	25.0955			0	0
Home 9	Control	2024-06-01					77.43	9.02	31.41	36.99	195	118	18	411	484	15700	1308.33	1013	295.333	22.5732			0	0
Home 9	Control	2024-07-01					66.11	8.87	20.25	36.99	212	116	19	265	484	15700	1308.33	865	443.333	33.8854			0	0
Home 9	Control	2024-08-01					70.55	9.25	24.31	36.99	217	121	25	318	484	15700	1308.33	923	385.333	29.4522			0	0
Home 9	Control	2024-09-01					65.2	10.32	17.89	36.99	186	135	25	234	484	15700	1308.33	853	455.333	34.8025			0	0
Home 9	Control	2024-10-01					71.85	12.08	22.78	36.99	202	158	36	298	484	15700	1308.33	940	368.333	28.1529			0	0
Home 9	Control	2024-11-01					75.82	13.53	25.3	36.99	198	177	63	331	484	15700	1308.33	992	316.333	24.1783			0	0
Home 9	Control	2024-12-01					87.13	15.9	34.24	36.99	213	208	53	448	484	15700	1308.33	1140	168.333	12.8662			0	0
Home 10	Renovation	2020-01-01	2022	March	2022-03-01		38.92	4.52	11.62	22.78	248	119	133	306	600	31600	2633.33	1025	1608.33	61.0759	-26.0		0	0
Home 10	Renovation	2020-02-01	2022	March	2022-03-01		41.01	4.33	13.9	22.78	275	114	87	366	600	31600	2633.33	1080	1553.33	58.9873	-25.0		0	0
Home 10	Renovation	2020-03-01	2022	March	2022-03-01		39.84	3.84	13.22	22.78	238	101	99	348	600	31600	2633.33	1049	1584.33	60.1646	-24.0		0	0
Home 10	Renovation	2020-04-01	2022	March	2022-03-01		42.3	3.3	16.22	22.78	255	87	93	427	600	31600	2633.33	1114	1519.33	57.6962	-23.0		0	0
Home 10	Renovation	2020-05-01	2022	March	2022-03-01		37.14	3.0	11.35	22.78	240	79	38	299	600	31600	2633.33	978	1655.33	62.8608	-22.0		0	0
Home 10	Renovation	2020-06-01	2022	March	2022-03-01		38.7	2.7	13.22	22.78	258	71	41	348	600	31600	2633.33	1019	1614.33	61.3038	-21.0		0	0
Home 10	Renovation	2020-07-01	2022	March	2022-03-01		38.7	2.62	13.29	22.78	225	69	48	350	600	31600	2633.33	1019	1614.33	61.3038	-20.0		0	0
Home 10	Renovation	2020-08-01	2022	March	2022-03-01		39.0	2.73	13.48	22.78	220	72	45	355	600	31600	2633.33	1027	1606.33	61	-19.0		0	0
Home 10	Renovation	2020-09-01	2022	March	2022-03-01		41.7	3.08	15.84	22.78	242	81	64	417	600	31600	2633.33	1098	1535.33	58.3038	-18.0		0	0
Home 10	Renovation	2020-10-01	2022	March	2022-03-01		36.87	3.53	10.56	22.78	215	93	69	278	600	31600	2633.33	971	1662.33	63.1266	-17.0		0	0
Home 10	Renovation	2020-11-01	2022	March	2022-03-01		40.59	4.03	13.78	22.78	254	106	96	363	600	31600	2633.33	1069	1564.33	59.4051	-16.0		0	0
Home 10	Renovation	2020-12-01	2022	March	2022-03-01		44.39	4.75	16.86	22.78	270	125	117	444	600	31600	2633.33	1169	1464.33	55.6076	-15.0		0	0
Home 10	Renovation	2021-01-01	2022	March	2022-03-01		44.59	5.18	16.28	23.14	288	138	134	434	617	32000	2666.67	1189	1477.67	55.4125	-14.0		0	0
Home 10	Renovation	2021-02-01	2022	March	2022-03-01		41.89	5.21	13.54	23.14	271	139	105	361	617	32000	2666.67	1117	1549.67	58.1125	-13.0		0	0
Home 10	Renovation	2021-03-01	2022	March	2022-03-01		41.32	4.61	13.58	23.14	257	123	90	362	617	32000	2666.67	1102	1564.67	58.675	-12.0		0	0
Home 10	Renovation	2021-04-01	2022	March	2022-03-01		42.49	3.98	15.38	23.14	289	106	62	410	617	32000	2666.67	1133	1533.67	57.5125	-11.0		0	0
Home 10	Renovation	2021-05-01	2022	March	2022-03-01		42.0	3.56	15.3	23.14	245	95	51	408	617	32000	2666.67	1120	1546.67	58	-10.0		0	0
Home 10	Renovation	2021-06-01	2022	March	2022-03-01		41.51	3.22	15.15	23.14	221	86	41	404	617	32000	2666.67	1107	1559.67	58.4875	-9.0		0	0
Home 10	Renovation	2021-07-01	2022	March	2022-03-01		35.89	3.11	9.64	23.14	241	83	43	257	617	32000	2666.67	957	1709.67	64.1125	-8.0		0	0
Home 10	Renovation	2021-08-01	2022	March	2022-03-01		39.71	3.3	13.28	23.14	219	88	41	354	617	32000	2666.67	1059	1607.67	60.2875	-7.0		0	0
Home 10	Renovation	2021-09-01	2022	March	2022-03-01		40.39	3.68	13.58	23.14	226	98	59	362	617	32000	2666.67	1077	1589.67	59.6125	-6.0		0	0
Home 10	Renovation	2021-10-01	2022	March	2022-03-01		43.46	4.24	16.09	23.14	260	113	104	429	617	32000	2666.67	1159	1507.67	56.5375	-5.0		0	0
Home 10	Renovation	2021-11-01	2022	March	2022-03-01		40.61	4.84	12.64	23.14	235	129	103	337	617	32000	2666.67	1083	1583.67	59.3875	-4.0		0	0
Home 10	Renovation	2021-12-01	2022	March	2022-03-01		43.09	5.62	14.32	23.14	256	150	105	382	617	32000	2666.67	1149	1517.67	56.9125	-3.0		0	0
Home 10	Renovation	2022-01-01	2022	March	2022-03-01		47.6	6.22	16.98	24.4	249	170	124	464	667	32800	2733.33	1301	1432.33	52.4024	-2.0		0	0
Home 10	Renovation	2022-02-01	2022	March	2022-03-01		45.4	6.18	14.82	24.4	275	169	75	405	667	32800	2733.33	1241	1492.33	54.5976	-1.0		0	0
Home 10	Renovation	2022-03-01	2022	March	2022-03-01		47.3	3.84	19.06	24.4	255	105	33	521	667	32800	2733.33	1293	1440.33	52.6951	0.0		1	0
Home 10	Renovation	2022-04-01	2022	March	2022-03-01		44.63	3.4	16.83	24.4	268	93	33	460	667	32800	2733.33	1220	1513.33	55.3659	1.0		1	0
Home 10	Renovation	2022-05-01	2022	March	2022-03-01		49.83	3.0	22.43	24.4	264	82	23	613	667	32800	2733.33	1362	1371.33	50.1707	2.0		1	0
Home 10	Renovation	2022-06-01	2022	March	2022-03-01		43.79	2.71	16.68	24.4	225	74	23	456	667	32800	2733.33	1197	1536.33	56.2073	3.0		1	0
Home 10	Renovation	2022-07-01	2022	March	2022-03-01		43.94	2.6	16.94	24.4	270	71	23	463	667	32800	2733.33	1201	1532.33	56.061	4.0		1	0
Home 10	Renovation	2022-08-01	2022	March	2022-03-01		47.2	2.78	20.01	24.4	250	76	33	547	667	32800	2733.33	1290	1443.33	52.8049	5.0		1	0
Home 10	Renovation	2022-09-01	2022	March	2022-03-01		44.12	3.07	16.65	24.4	235	84	34	455	667	32800	2733.33	1206	1527.33	55.878	6.0		1	0
Home 10	Renovation	2022-10-01	2022	March	2022-03-01		49.35	3.59	21.37	24.4	273	98	40	584	667	32800	2733.33	1349	1384.33	50.6463	7.0		1	0
Home 10	Renovation	2022-11-01	2022	March	2022-03-01		47.49	4.02	19.06	24.4	312	110	57	521	667	32800	2733.33	1298	1435.33	52.5122	8.0		1	0
Home 10	Renovation	2022-12-01	2022	March	2022-03-01		47.85	4.76	18.7	24.4	275	130	42	511	667	32800	2733.33	1308	1425.33	52.1463	9.0		1	0
Home 10	Renovation	2023-01-01	2022	March	2022-03-01		46.08	4.45	16.34	25.3	273	123	78	452	700	33200	2766.67	1275	1491.67	53.9157	10.0		1	0
Home 10	Renovation	2023-02-01	2022	March	2022-03-01		57.47	4.05	28.12	25.3	265	112	79	778	700	33200	2766.67	1590	1176.67	42.5301	11.0		1	0
Home 10	Renovation	2023-03-01	2022	March	2022-03-01		47.6	3.54	18.76	25.3	253	98	39	519	700	33200	2766.67	1317	1449.67	52.3976	12.0		1	0
Home 10	Renovation	2023-04-01	2022	March	2022-03-01		46.08	3.14	17.64	25.3	252	87	59	488	700	33200	2766.67	1275	1491.67	53.9157	13.0		1	0
Home 10	Renovation	2023-05-01	2022	March	2022-03-01		45.22	2.82	17.1	25.3	250	78	38	473	700	33200	2766.67	1251	1515.67	54.7831	14.0		1	0
Home 10	Renovation	2023-06-01	2022	March	2022-03-01		48.9	2.49	21.11	25.3	250	69	23	584	700	33200	2766.67	1353	1413.67	51.0964	15.0		1	0
Home 10	Renovation	2023-07-01	2022	March	2022-03-01		41.17	2.42	13.45	25.3	253	67	26	372	700	33200	2766.67	1139	1627.67	58.8313	16.0		1	0
Home 10	Renovation	2023-08-01	2022	March	2022-03-01		45.0	2.57	17.13	25.3	261	71	39	474	700	33200	2766.67	1245	1521.67	55	17.0		1	0
Home 10	Renovation	2023-09-01	2022	March	2022-03-01		38.67	2.86	10.52	25.3	257	79	28	291	700	33200	2766.67	1070	1696.67	61.3253	18.0		1	0
Home 10	Renovation	2023-10-01	2022	March	2022-03-01		44.35	3.29	15.76	25.3	262	91	34	436	700	33200	2766.67	1227	1539.67	55.6506	19.0		1	0
Home 10	Renovation	2023-11-01	2022	March	2022-03-01		49.41	3.72	20.39	25.3	267	103	29	564	700	33200	2766.67	1367	1399.67	50.5904	20.0		1	0
Home 10	Renovation	2023-12-01	2022	March	2022-03-01		53.93	4.41	24.22	25.3	276	122	31	670	700	33200	2766.67	1492	1274.67	46.0723	21.0		1	0
Home 10	Renovation	2024-01-01	2022	March	2022-03-01		46.96	3.94	18.3	24.71	235	117	93	543	733	35600	2966.67	1393	1573.67	53.0449	22.0		1	0
Home 10	Renovation	2024-02-01	2022	March	2022-03-01		46.85	3.71	18.44	24.71	300	110	54	547	733	35600	2966.67	1390	1576.67	53.1461	23.0		1	0
Home 10	Renovation	2024-03-01	2022	March	2022-03-01		40.25	3.24	12.3	24.71	316	96	60	365	733	35600	2966.67	1194	1772.67	59.7528	24.0		1	0
Home 10	Renovation	2024-04-01	2022	March	2022-03-01		42.37	2.83	14.83	24.71	230	84	40	440	733	35600	2966.67	1257	1709.67	57.6292	25.0		1	0
Home 10	Renovation	2024-05-01	2022	March	2022-03-01		49.55	2.56	22.28	24.71	233	76	40	661	733	35600	2966.67	1470	1496.67	50.4494	26.0		1	0
Home 10	Renovation	2024-06-01	2022	March	2022-03-01		42.54	2.29	15.54	24.71	247	68	29	461	733	35600	2966.67	1262	1704.67	57.4607	27.0		1	0
Home 10	Renovation	2024-07-01	2022	March	2022-03-01		43.75	2.19	16.85	24.71	202	65	29	500	733	35600	2966.67	1298	1668.67	56.2472	28.0		1	0
Home 10	Renovation	2024-08-01	2022	March	2022-03-01		41.93	2.29	14.93	24.71	304	68	20	443	733	35600	2966.67	1244	1722.67	58.0674	29.0		1	0
Home 10	Renovation	2024-09-01	2022	March	2022-03-01		41.76	2.6	14.46	24.71	250	77	26	429	733	35600	2966.67	1239	1727.67	58.236	30.0		1	0
Home 10	Renovation	2024-10-01	2022	March	2022-03-01		43.25	3.0	15.54	24.71	256	89	26	461	733	35600	2966.67	1283	1683.67	56.7528	31.0		1	0
Home 10	Renovation	2024-11-01	2022	March	2022-03-01		43.31	3.44	15.17	24.71	269	102	30	450	733	35600	2966.67	1285	1681.67	56.6854	32.0		1	0
Home 10	Renovation	2024-12-01	2022	March	2022-03-01		50.63	4.01	21.91	24.71	259	119	42	650	733	35600	2966.67	1502	1464.67	49.3708	33.0		1	0
Home 11	Control	2020-01-01					80.33	19.33	32.13	28.87	245	290	153	482	433	18000	1500	1205	295	19.6667			0	0
Home 11	Control	2020-02-01					77.87	18.13	30.87	28.87	237	272	105	463	433	18000	1500	1168	332	22.1333			0	0
Home 11	Control	2020-03-01					78.07	16.07	33.13	28.87	232	241	121	497	433	18000	1500	1171	329	21.9333			0	0
Home 11	Control	2020-04-01					77.8	14.07	34.87	28.87	243	211	106	523	433	18000	1500	1167	333	22.2			0	0
Home 11	Control	2020-05-01					80.87	12.8	39.2	28.87	255	192	76	588	433	18000	1500	1213	287	19.1333			0	0
Home 11	Control	2020-06-01					67.0	11.27	26.87	28.87	244	169	76	403	433	18000	1500	1005	495	33			0	0
Home 11	Control	2020-07-01					77.2	10.93	37.4	28.87	227	164	43	561	433	18000	1500	1158	342	22.8			0	0
Home 11	Control	2020-08-01					71.8	11.47	31.47	28.87	231	172	43	472	433	18000	1500	1077	423	28.2			0	0
Home 11	Control	2020-09-01					79.07	13.0	37.2	28.87	264	195	50	558	433	18000	1500	1186	314	20.9333			0	0
Home 11	Control	2020-10-01					83.6	14.93	39.8	28.87	233	224	116	597	433	18000	1500	1254	246	16.4			0	0
Home 11	Control	2020-11-01					84.93	17.0	39.07	28.87	226	255	123	586	433	18000	1500	1274	226	15.0667			0	0
Home 11	Control	2020-12-01					86.73	19.8	38.07	28.87	262	297	136	571	433	18000	1500	1301	199	13.2667			0	0
Home 11	Control	2021-01-01					84.32	19.02	37.66	27.64	283	298	138	590	433	18800	1566.67	1321	245.667	15.6809			0	0
Home 11	Control	2021-02-01					76.21	18.13	30.45	27.64	230	284	100	477	433	18800	1566.67	1194	372.667	23.7872			0	0
Home 11	Control	2021-03-01					78.06	15.89	34.53	27.64	271	249	158	541	433	18800	1566.67	1223	343.667	21.9362			0	0
Home 11	Control	2021-04-01					83.3	13.91	41.74	27.64	236	218	84	654	433	18800	1566.67	1305	261.667	16.7021			0	0
Home 11	Control	2021-05-01					72.51	12.57	32.3	27.64	230	197	70	506	433	18800	1566.67	1136	430.667	27.4894			0	0
Home 11	Control	2021-06-01					75.06	11.11	36.32	27.64	241	174	61	569	433	18800	1566.67	1176	390.667	24.9362			0	0
Home 11	Control	2021-07-01					72.83	10.91	34.28	27.64	229	171	53	537	433	18800	1566.67	1141	425.667	27.1702			0	0
Home 11	Control	2021-08-01					74.04	11.43	34.98	27.64	224	179	55	548	433	18800	1566.67	1160	406.667	25.9574			0	0
Home 11	Control	2021-09-01					77.62	12.7	37.28	27.64	256	199	59	584	433	18800	1566.67	1216	350.667	22.383			0	0
Home 11	Control	2021-10-01					76.4	14.74	34.02	27.64	259	231	96	533	433	18800	1566.67	1197	369.667	23.5957			0	0
Home 11	Control	2021-11-01					79.85	16.72	35.49	27.64	240	262	151	556	433	18800	1566.67	1251	315.667	20.1489			0	0
Home 11	Control	2021-12-01					83.43	19.79	36.0	27.64	252	310	175	564	433	18800	1566.67	1307	259.667	16.5745			0	0
Home 11	Control	2022-01-01					76.66	17.78	30.4	28.48	253	286	193	489	458	19300	1608.33	1233	375.333	23.3368			0	0
Home 11	Control	2022-02-01					83.44	16.23	38.74	28.48	252	261	118	623	458	19300	1608.33	1342	266.333	16.5596			0	0
Home 11	Control	2022-03-01					83.5	14.36	40.66	28.48	207	231	90	654	458	19300	1608.33	1343	265.333	16.4974			0	0
Home 11	Control	2022-04-01					86.67	12.62	45.58	28.48	214	203	86	733	458	19300	1608.33	1394	214.333	13.3264			0	0
Home 11	Control	2022-05-01					78.4	11.19	38.74	28.48	228	180	73	623	458	19300	1608.33	1261	347.333	21.5959			0	0
Home 11	Control	2022-06-01					71.94	10.13	33.33	28.48	231	163	69	536	458	19300	1608.33	1157	451.333	28.0622			0	0
Home 11	Control	2022-07-01					74.61	9.82	36.31	28.48	231	158	38	584	458	19300	1608.33	1200	408.333	25.3886			0	0
Home 11	Control	2022-08-01					81.26	10.38	42.4	28.48	237	167	76	682	458	19300	1608.33	1307	301.333	18.7358			0	0
Home 11	Control	2022-09-01					79.03	11.56	38.98	28.48	224	186	71	627	458	19300	1608.33	1271	337.333	20.9741			0	0
Home 11	Control	2022-10-01					82.07	13.31	40.29	28.48	241	214	86	648	458	19300	1608.33	1320	288.333	17.9275			0	0
Home 11	Control	2022-11-01					81.2	14.98	37.74	28.48	238	241	94	607	458	19300	1608.33	1306	302.333	18.7979			0	0
Home 11	Control	2022-12-01					99.36	17.72	53.16	28.48	243	285	107	855	458	19300	1608.33	1598	10.3333	0.642487			0	0
Home 11	Control	2023-01-01					103.3	16.76	58.21	28.33	236	271	174	941	458	19400	1616.67	1670	-53.3333	-3.29897			0	0
Home 11	Control	2023-02-01					79.92	15.53	36.06	28.33	228	251	130	583	458	19400	1616.67	1292	324.667	20.0825			0	0
Home 11	Control	2023-03-01					93.46	13.86	51.28	28.33	223	224	78	829	458	19400	1616.67	1511	105.667	6.53608			0	0
Home 11	Control	2023-04-01					86.35	12.06	45.96	28.33	216	195	63	743	458	19400	1616.67	1396	220.667	13.6495			0	0
Home 11	Control	2023-05-01					83.63	10.82	44.47	28.33	215	175	66	719	458	19400	1616.67	1352	264.667	16.3711			0	0
Home 11	Control	2023-06-01					76.02	9.65	38.04	28.33	217	156	85	615	458	19400	1616.67	1229	387.667	23.9794			0	0
Home 11	Control	2023-07-01					97.61	9.28	60.0	28.33	220	150	48	970	458	19400	1616.67	1578	38.6667	2.39175			0	0
Home 11	Control	2023-08-01					93.53	9.9	55.3	28.33	226	160	39	894	458	19400	1616.67	1512	104.667	6.47423			0	0
Home 11	Control	2023-09-01					73.42	10.95	34.14	28.33	222	177	67	552	458	19400	1616.67	1187	429.667	26.5773			0	0
Home 11	Control	2023-10-01					97.42	12.68	56.41	28.33	227	205	85	912	458	19400	1616.67	1575	41.6667	2.57732			0	0
Home 11	Control	2023-11-01					86.85	14.41	44.1	28.33	232	233	57	713	458	19400	1616.67	1404	212.667	13.1546			0	0
Home 11	Control	2023-12-01					88.21	16.89	42.99	28.33	238	273	140	695	458	19400	1616.67	1426	190.667	11.7938			0	0
Home 11	Control	2024-01-01					78.03	17.4	33.82	26.81	200	303	133	589	467	20900	1741.67	1359	382.667	21.9713			0	0
Home 11	Control	2024-02-01					91.69	17.11	47.77	26.81	238	298	168	832	467	20900	1741.67	1597	144.667	8.30622			0	0
Home 11	Control	2024-03-01					86.01	14.99	44.21	26.81	194	261	186	770	467	20900	1741.67	1498	243.667	13.9904			0	0
Home 11	Control	2024-04-01					75.22	13.26	35.14	26.81	195	231	127	612	467	20900	1741.67	1310	431.667	24.7847			0	0
Home 11	Control	2024-05-01					74.81	11.77	36.23	26.81	233	205	73	631	467	20900	1741.67	1303	438.667	25.1866			0	0
Home 11	Control	2024-06-01					76.59	10.68	39.1	26.81	210	186	47	681	467	20900	1741.67	1334	407.667	23.4067			0	0
Home 11	Control	2024-07-01					75.73	10.28	38.64	26.81	238	179	107	673	467	20900	1741.67	1319	422.667	24.2679			0	0
Home 11	Control	2024-08-01					84.17	10.79	46.56	26.81	210	188	63	811	467	20900	1741.67	1466	275.667	15.8278			0	0
Home 11	Control	2024-09-01					83.94	12.23	44.9	26.81	210	213	80	782	467	20900	1741.67	1462	279.667	16.0574			0	0
Home 11	Control	2024-10-01					77.8	13.95	37.03	26.81	254	243	101	645	467	20900	1741.67	1355	386.667	22.201			0	0
Home 11	Control	2024-11-01					73.78	15.85	31.12	26.81	223	276	130	542	467	20900	1741.67	1285	456.667	26.2201			0	0
Home 11	Control	2024-12-01					81.01	18.6	35.6	26.81	246	324	152	620	467	20900	1741.67	1411	330.667	18.9856			0	0
Home 12	Control	2020-01-01					80.74	17.95	23.26	39.53	252	193	106	250	425	12900	1075	868	207	19.2558			0	0
Home 12	Control	2020-02-01					82.42	16.93	25.95	39.53	255	182	99	279	425	12900	1075	886	189	17.5814			0	0
Home 12	Control	2020-03-01					76.93	15.07	22.33	39.53	247	162	92	240	425	12900	1075	827	248	23.0698			0	0
Home 12	Control	2020-04-01					75.63	13.3	22.79	39.53	252	143	67	245	425	12900	1075	813	262	24.3721			0	0
Home 12	Control	2020-05-01					72.84	11.81	21.49	39.53	238	127	53	231	425	12900	1075	783	292	27.1628			0	0
Home 12	Control	2020-06-01					75.26	10.51	25.21	39.53	228	113	49	271	425	12900	1075	809	266	24.7442			0	0
Home 12	Control	2020-07-01					72.74	10.33	22.88	39.53	237	111	42	246	425	12900	1075	782	293	27.2558			0	0
Home 12	Control	2020-08-01					74.42	10.88	24.0	39.53	215	117	63	258	425	12900	1075	800	275	25.5814			0	0
Home 12	Control	2020-09-01					73.49	12.0	21.95	39.53	256	129	38	236	425	12900	1075	790	285	26.5116			0	0
Home 12	Control	2020-10-01					76.65	13.95	23.16	39.53	225	150	96	249	425	12900	1075	824	251	23.3488			0	0
Home 12	Control	2020-11-01					75.81	15.81	20.47	39.53	242	170	121	220	425	12900	1075	815	260	24.186			0	0
Home 12	Control	2020-12-01					83.81	18.7	25.58	39.53	253	201	84	275	425	12900	1075	901	174	16.186			0	0
Home 12	Control	2021-01-01					78.41	18.05	22.02	38.35	261	200	111	244	425	13300	1108.33	869	239.333	21.594			0	0
Home 12	Control	2021-02-01					81.29	17.23	25.71	38.35	281	191	102	285	425	13300	1108.33	901	207.333	18.7068			0	0
Home 12	Control	2021-03-01					83.64	15.25	30.05	38.35	269	169	71	333	425	13300	1108.33	927	181.333	16.3609			0	0
Home 12	Control	2021-04-01					78.32	13.26	26.71	38.35	221	147	65	296	425	13300	1108.33	868	240.333	21.6842			0	0
Home 12	Control	2021-05-01					71.73	11.91	21.47	38.35	227	132	50	238	425	13300	1108.33	795	313.333	28.2707			0	0
Home 12	Control	2021-06-01					72.54	10.65	23.55	38.35	216	118	66	261	425	13300	1108.33	804	304.333	27.4586			0	0
Home 12	Control	2021-07-01					69.2	10.38	20.48	38.35	218	115	52	227	425	13300	1108.33	767	341.333	30.797			0	0
Home 12	Control	2021-08-01					74.08	10.83	24.9	38.35	230	120	60	276	425	13300	1108.33	821	287.333	25.9248			0	0
Home 12	Control	2021-09-01					70.2	12.0	19.85	38.35	263	133	69	220	425	13300	1108.33	778	330.333	29.8045			0	0
Home 12	Control	2021-10-01					73.35	13.89	21.11	38.35	245	154	63	234	425	13300	1108.33	813	295.333	26.6466			0	0
Home 12	Control	2021-11-01					82.2	15.79	28.06	38.35	253	175	87	311	425	13300	1108.33	911	197.333	17.8045			0	0
Home 12	Control	2021-12-01					86.35	18.59	29.41	38.35	266	206	133	326	425	13300	1108.33	957	151.333	13.6541			0	0
Home 12	Control	2022-01-01					75.63	18.47	19.77	37.38	272	214	94	229	433	13900	1158.33	876	282.333	24.3741			0	0
Home 12	Control	2022-02-01					77.7	17.87	22.45	37.38	285	207	123	260	433	13900	1158.33	900	258.333	22.3022			0	0
Home 12	Control	2022-03-01					78.82	15.88	25.55	37.38	288	184	88	296	433	13900	1158.33	913	245.333	21.1799			0	0
Home 12	Control	2022-04-01					76.49	13.73	25.38	37.38	313	159	68	294	433	13900	1158.33	886	272.333	23.5108			0	0
Home 12	Control	2022-05-01					70.01	12.35	20.29	37.38	283	143	69	235	433	13900	1158.33	811	347.333	29.9856			0	0
Home 12	Control	2022-06-01					73.9	11.05	25.47	37.38	290	128	52	295	433	13900	1158.33	856	302.333	26.1007			0	0
Home 12	Control	2022-07-01					71.22	10.71	23.14	37.38	264	124	41	268	433	13900	1158.33	825	333.333	28.777			0	0
Home 12	Control	2022-08-01					77.53	11.4	28.75	37.38	275	132	59	333	433	13900	1158.33	898	260.333	22.4748			0	0
Home 12	Control	2022-09-01					74.07	12.6	24.09	37.38	277	146	50	279	433	13900	1158.33	858	300.333	25.9281			0	0
Home 12	Control	2022-10-01					77.35	14.5	25.47	37.38	251	168	87	295	433	13900	1158.33	896	262.333	22.6475			0	0
Home 12	Control	2022-11-01					78.39	16.66	24.35	37.38	246	193	106	282	433	13900	1158.33	908	250.333	21.6115			0	0
Home 12	Control	2022-12-01					85.9	19.68	28.83	37.38	275	228	116	334	433	13900	1158.33	995	163.333	14.1007			0	0
Home 12	Control	2023-01-01					73.81	19.05	20.09	34.66	293	238	152	251	433	14990	1249.17	922	327.167	26.1908			0	0
Home 12	Control	2023-02-01					79.01	18.33	26.02	34.66	285	229	102	325	433	14990	1249.17	987	262.167	20.9873			0	0
Home 12	Control	2023-03-01					80.05	16.09	29.3	34.66	274	201	145	366	433	14990	1249.17	1000	249.167	19.9466			0	0
Home 12	Control	2023-04-01					81.49	14.09	32.74	34.66	269	176	90	409	433	14990	1249.17	1018	231.167	18.5057			0	0
Home 12	Control	2023-05-01					79.33	12.73	31.94	34.66	268	159	68	399	433	14990	1249.17	991	258.167	20.6671			0	0
Home 12	Control	2023-06-01					67.89	11.45	21.77	34.66	273	143	80	272	433	14990	1249.17	848	401.167	32.1147			0	0
Home 12	Control	2023-07-01					72.45	10.89	26.9	34.66	273	136	46	336	433	14990	1249.17	905	344.167	27.5517			0	0
Home 12	Control	2023-08-01					74.21	11.53	28.02	34.66	280	144	43	350	433	14990	1249.17	927	322.167	25.7905			0	0
Home 12	Control	2023-09-01					74.29	12.89	26.74	34.66	277	161	52	334	433	14990	1249.17	928	321.167	25.7105			0	0
Home 12	Control	2023-10-01					76.69	14.81	27.22	34.66	282	185	115	340	433	14990	1249.17	958	291.167	23.3089			0	0
Home 12	Control	2023-11-01					77.65	17.05	25.94	34.66	291	213	89	324	433	14990	1249.17	970	279.167	22.3482			0	0
Home 12	Control	2023-12-01					78.29	20.17	23.46	34.66	301	252	243	293	433	14990	1249.17	978	271.167	21.7078			0	0
Home 12	Control	2024-01-01					76.88	19.05	24.38	33.45	316	254	100	325	446	16000	1333.33	1025	308.333	23.125			0	0
Home 12	Control	2024-02-01					78.82	18.0	27.38	33.45	266	240	246	365	446	16000	1333.33	1051	282.333	21.175			0	0
Home 12	Control	2024-03-01					75.23	15.75	26.02	33.45	298	210	141	347	446	16000	1333.33	1003	330.333	24.775			0	0
Home 12	Control	2024-04-01					66.82	13.73	19.65	33.45	299	183	105	262	446	16000	1333.33	891	442.333	33.175			0	0
Home 12	Control	2024-05-01					66.75	12.45	20.85	33.45	229	166	78	278	446	16000	1333.33	890	443.333	33.25			0	0
Home 12	Control	2024-06-01					67.2	11.02	22.72	33.45	297	147	77	303	446	16000	1333.33	896	437.333	32.8			0	0
Home 12	Control	2024-07-01					68.1	10.88	23.78	33.45	228	145	64	317	446	16000	1333.33	908	425.333	31.9			0	0
Home 12	Control	2024-08-01					70.2	11.4	25.35	33.45	255	152	93	338	446	16000	1333.33	936	397.333	29.8			0	0
Home 12	Control	2024-09-01					66.45	12.52	20.48	33.45	239	167	91	273	446	16000	1333.33	886	447.333	33.55			0	0
Home 12	Control	2024-10-01					76.05	14.7	27.9	33.45	279	196	120	372	446	16000	1333.33	1014	319.333	23.95			0	0
Home 12	Control	2024-11-01					67.73	16.8	17.48	33.45	274	224	129	233	446	16000	1333.33	903	430.333	32.275			0	0
Home 12	Control	2024-12-01					81.9	19.5	28.95	33.45	311	260	176	386	446	16000	1333.33	1092	241.333	18.1			0	0
Home 13	Subsidy	2020-01-01	2022/2023	April and October	2022-04-01	2023-10-01	84.85	9.18	19.2	56.47	148	65	95	136	400	8500	708.333	601	107.333	15.1529	-27.0	-45.0	0	0
Home 13	Subsidy	2020-02-01	2022/2023	April and October	2022-04-01	2023-10-01	89.93	8.61	24.85	56.47	155	61	60	176	400	8500	708.333	637	71.3333	10.0706	-26.0	-44.0	0	0
Home 13	Subsidy	2020-03-01	2022/2023	April and October	2022-04-01	2023-10-01	84.99	7.62	20.89	56.47	142	54	54	148	400	8500	708.333	602	106.333	15.0118	-25.0	-43.0	0	0
Home 13	Subsidy	2020-04-01	2022/2023	April and October	2022-04-01	2023-10-01	87.11	6.64	24.0	56.47	137	47	63	170	400	8500	708.333	617	91.3333	12.8941	-24.0	-42.0	0	0
Home 13	Subsidy	2020-05-01	2022/2023	April and October	2022-04-01	2023-10-01	82.87	6.07	20.33	56.47	121	43	48	144	400	8500	708.333	587	121.333	17.1294	-23.0	-41.0	0	0
Home 13	Subsidy	2020-06-01	2022/2023	April and October	2022-04-01	2023-10-01	86.54	5.36	24.71	56.47	121	38	35	175	400	8500	708.333	613	95.3333	13.4588	-22.0	-40.0	0	0
Home 13	Subsidy	2020-07-01	2022/2023	April and October	2022-04-01	2023-10-01	88.52	5.22	26.82	56.47	127	37	33	190	400	8500	708.333	627	81.3333	11.4824	-21.0	-39.0	0	0
Home 13	Subsidy	2020-08-01	2022/2023	April and October	2022-04-01	2023-10-01	85.55	5.51	23.58	56.47	112	39	39	167	400	8500	708.333	606	102.333	14.4471	-20.0	-38.0	0	0
Home 13	Subsidy	2020-09-01	2022/2023	April and October	2022-04-01	2023-10-01	90.78	6.21	28.09	56.47	142	44	43	199	400	8500	708.333	643	65.3333	9.22353	-19.0	-37.0	0	0
Home 13	Subsidy	2020-10-01	2022/2023	April and October	2022-04-01	2023-10-01	86.4	7.2	22.73	56.47	129	51	52	161	400	8500	708.333	612	96.3333	13.6	-18.0	-36.0	0	0
Home 13	Subsidy	2020-11-01	2022/2023	April and October	2022-04-01	2023-10-01	89.08	8.05	24.56	56.47	136	57	75	174	400	8500	708.333	631	77.3333	10.9176	-17.0	-35.0	0	0
Home 13	Subsidy	2020-12-01	2022/2023	April and October	2022-04-01	2023-10-01	88.52	9.46	22.59	56.47	120	67	77	160	400	8500	708.333	627	81.3333	11.4824	-16.0	-34.0	0	0
Home 13	Subsidy	2021-01-01	2022/2023	April and October	2022-04-01	2023-10-01	95.06	13.62	27.51	53.93	139	101	94	204	400	8900	741.667	705	36.6667	4.94382	-15.0	-33.0	0	0
Home 13	Subsidy	2021-02-01	2022/2023	April and October	2022-04-01	2023-10-01	93.17	14.83	24.4	53.93	154	110	59	181	400	8900	741.667	691	50.6667	6.83146	-14.0	-32.0	0	0
Home 13	Subsidy	2021-03-01	2022/2023	April and October	2022-04-01	2023-10-01	91.55	13.21	24.4	53.93	146	98	81	181	400	8900	741.667	679	62.6667	8.44944	-13.0	-31.0	0	0
Home 13	Subsidy	2021-04-01	2022/2023	April and October	2022-04-01	2023-10-01	97.75	11.6	32.22	53.93	145	86	60	239	400	8900	741.667	725	16.6667	2.24719	-12.0	-30.0	0	0
Home 13	Subsidy	2021-05-01	2022/2023	April and October	2022-04-01	2023-10-01	87.51	10.25	23.33	53.93	129	76	47	173	400	8900	741.667	649	92.6667	12.4944	-11.0	-29.0	0	0
Home 13	Subsidy	2021-06-01	2022/2023	April and October	2022-04-01	2023-10-01	89.93	9.17	26.83	53.93	132	68	42	199	400	8900	741.667	667	74.6667	10.0674	-10.0	-28.0	0	0
Home 13	Subsidy	2021-07-01	2022/2023	April and October	2022-04-01	2023-10-01	92.76	8.9	29.93	53.93	130	66	43	222	400	8900	741.667	688	53.6667	7.23596	-9.0	-27.0	0	0
Home 13	Subsidy	2021-08-01	2022/2023	April and October	2022-04-01	2023-10-01	91.55	9.44	28.18	53.93	141	70	42	209	400	8900	741.667	679	62.6667	8.44944	-8.0	-26.0	0	0
Home 13	Subsidy	2021-09-01	2022/2023	April and October	2022-04-01	2023-10-01	86.16	10.52	21.71	53.93	139	78	32	161	400	8900	741.667	639	102.667	13.8427	-7.0	-25.0	0	0
Home 13	Subsidy	2021-10-01	2022/2023	April and October	2022-04-01	2023-10-01	94.79	12.0	28.85	53.93	134	89	45	214	400	8900	741.667	703	38.6667	5.21348	-6.0	-24.0	0	0
Home 13	Subsidy	2021-11-01	2022/2023	April and October	2022-04-01	2023-10-01	90.74	13.75	23.06	53.93	113	102	63	171	400	8900	741.667	673	68.6667	9.25843	-5.0	-23.0	0	0
Home 13	Subsidy	2021-12-01	2022/2023	April and October	2022-04-01	2023-10-01	98.02	16.31	27.78	53.93	148	121	91	206	400	8900	741.667	727	14.6667	1.97753	-4.0	-22.0	0	0
Home 13	Subsidy	2022-01-01	2022/2023	April and October	2022-04-01	2023-10-01	74.9	13.03	20.48	41.38	138	126	102	198	400	11600	966.667	724	242.667	25.1034	-3.0	-21.0	0	0
Home 13	Subsidy	2022-02-01	2022/2023	April and October	2022-04-01	2023-10-01	68.9	12.62	14.9	41.38	169	122	77	144	400	11600	966.667	666	300.667	31.1034	-2.0	-20.0	0	0
Home 13	Subsidy	2022-03-01	2022/2023	April and October	2022-04-01	2023-10-01	73.86	11.28	21.21	41.38	170	109	77	205	400	11600	966.667	714	252.667	26.1379	-1.0	-19.0	0	0
Home 13	Subsidy	2022-04-01	2022/2023	April and October	2022-04-01	2023-10-01	78.83	8.59	28.86	41.38	122	83	45	279	400	11600	966.667	762	204.667	21.1724	0.0	-18.0	1	0
Home 13	Subsidy	2022-05-01	2022/2023	April and October	2022-04-01	2023-10-01	70.97	8.07	21.52	41.38	153	78	41	208	400	11600	966.667	686	280.667	29.0345	1.0	-17.0	1	0
Home 13	Subsidy	2022-06-01	2022/2023	April and October	2022-04-01	2023-10-01	71.38	7.55	22.45	41.38	150	73	29	217	400	11600	966.667	690	276.667	28.6207	2.0	-16.0	1	0
Home 13	Subsidy	2022-07-01	2022/2023	April and October	2022-04-01	2023-10-01	78.0	7.55	29.07	41.38	151	73	30	281	400	11600	966.667	754	212.667	22	3.0	-15.0	1	0
Home 13	Subsidy	2022-08-01	2022/2023	April and October	2022-04-01	2023-10-01	74.79	8.07	25.34	41.38	133	78	31	245	400	11600	966.667	723	243.667	25.2069	4.0	-14.0	1	0
Home 13	Subsidy	2022-09-01	2022/2023	April and October	2022-04-01	2023-10-01	72.52	9.0	22.14	41.38	158	87	42	214	400	11600	966.667	701	265.667	27.4828	5.0	-13.0	1	0
Home 13	Subsidy	2022-10-01	2022/2023	April and October	2022-04-01	2023-10-01	81.52	10.45	29.69	41.38	138	101	77	287	400	11600	966.667	788	178.667	18.4828	6.0	-12.0	1	0
Home 13	Subsidy	2022-11-01	2022/2023	April and October	2022-04-01	2023-10-01	73.45	11.69	20.38	41.38	168	113	65	197	400	11600	966.667	710	256.667	26.5517	7.0	-11.0	1	0
Home 13	Subsidy	2022-12-01	2022/2023	April and October	2022-04-01	2023-10-01	80.38	13.76	25.24	41.38	170	133	157	244	400	11600	966.667	777	189.667	19.6207	8.0	-10.0	1	0
Home 13	Subsidy	2023-01-01	2022/2023	April and October	2022-04-01	2023-10-01	67.6	10.6	16.2	40.8	157	106	93	162	408	12000	1000	676	324	32.4	9.0	-9.0	1	0
Home 13	Subsidy	2023-02-01	2022/2023	April and October	2022-04-01	2023-10-01	72.8	8.9	23.1	40.8	150	89	78	231	408	12000	1000	728	272	27.2	10.0	-8.0	1	0
Home 13	Subsidy	2023-03-01	2022/2023	April and October	2022-04-01	2023-10-01	70.2	7.9	21.5	40.8	146	79	50	215	408	12000	1000	702	298	29.8	11.0	-7.0	1	0
Home 13	Subsidy	2023-04-01	2022/2023	April and October	2022-04-01	2023-10-01	69.8	6.8	22.2	40.8	142	68	60	222	408	12000	1000	698	302	30.2	12.0	-6.0	1	0
Home 13	Subsidy	2023-05-01	2022/2023	April and October	2022-04-01	2023-10-01	71.0	6.2	24.0	40.8	142	62	36	240	408	12000	1000	710	290	29	13.0	-5.0	1	0
Home 13	Subsidy	2023-06-01	2022/2023	April and October	2022-04-01	2023-10-01	69.9	5.5	23.6	40.8	144	55	34	236	408	12000	1000	699	301	30.1	14.0	-4.0	1	0
Home 13	Subsidy	2023-07-01	2022/2023	April and October	2022-04-01	2023-10-01	64.9	5.4	18.7	40.8	147	54	58	187	408	12000	1000	649	351	35.1	15.0	-3.0	1	0
Home 13	Subsidy	2023-08-01	2022/2023	April and October	2022-04-01	2023-10-01	67.5	5.6	21.1	40.8	149	56	32	211	408	12000	1000	675	325	32.5	16.0	-2.0	1	0
Home 13	Subsidy	2023-09-01	2022/2023	April and October	2022-04-01	2023-10-01	69.4	6.2	22.4	40.8	147	62	56	224	408	12000	1000	694	306	30.6	17.0	-1.0	1	0
Home 13	Subsidy	2023-10-01	2022/2023	April and October	2022-04-01	2023-10-01	67.1	6.4	19.9	40.8	134	64	52	199	408	12000	1000	671	329	32.9	18.0	0.0	1	1
Home 13	Subsidy	2023-11-01	2022/2023	April and October	2022-04-01	2023-10-01	74.2	7.5	25.9	40.8	140	75	59	259	408	12000	1000	742	258	25.8	19.0	1.0	1	1
Home 13	Subsidy	2023-12-01	2022/2023	April and October	2022-04-01	2023-10-01	84.0	9.3	33.9	40.8	152	93	126	339	408	12000	1000	840	160	16	20.0	2.0	1	1
Home 13	Subsidy	2024-01-01	2022/2023	April and October	2022-04-01	2023-10-01	82.53	15.89	23.68	42.95	138	151	69	225	408	11400	950	784	166	17.4737	21.0	3.0	1	1
Home 13	Subsidy	2024-02-01	2022/2023	April and October	2022-04-01	2023-10-01	81.37	18.0	20.42	42.95	153	171	115	194	408	11400	950	773	177	18.6316	22.0	4.0	1	1
Home 13	Subsidy	2024-03-01	2022/2023	April and October	2022-04-01	2023-10-01	74.0	15.89	15.16	42.95	123	151	74	144	408	11400	950	703	247	26	23.0	5.0	1	1
Home 13	Subsidy	2024-04-01	2022/2023	April and October	2022-04-01	2023-10-01	74.0	13.68	17.37	42.95	125	130	43	165	408	11400	950	703	247	26	24.0	6.0	1	1
Home 13	Subsidy	2024-05-01	2022/2023	April and October	2022-04-01	2023-10-01	80.11	12.32	24.84	42.95	160	117	48	236	408	11400	950	761	189	19.8947	25.0	7.0	1	1
Home 13	Subsidy	2024-06-01	2022/2023	April and October	2022-04-01	2023-10-01	83.26	11.05	29.26	42.95	156	105	41	278	408	11400	950	791	159	16.7368	26.0	8.0	1	1
Home 13	Subsidy	2024-07-01	2022/2023	April and October	2022-04-01	2023-10-01	76.32	10.74	22.63	42.95	112	102	34	215	408	11400	950	725	225	23.6842	27.0	9.0	1	1
Home 13	Subsidy	2024-08-01	2022/2023	April and October	2022-04-01	2023-10-01	72.21	11.26	18.0	42.95	122	107	22	171	408	11400	950	686	264	27.7895	28.0	10.0	1	1
Home 13	Subsidy	2024-09-01	2022/2023	April and October	2022-04-01	2023-10-01	75.58	12.63	20.0	42.95	126	120	34	190	408	11400	950	718	232	24.4211	29.0	11.0	1	1
Home 13	Subsidy	2024-10-01	2022/2023	April and October	2022-04-01	2023-10-01	78.21	14.42	20.84	42.95	141	137	49	198	408	11400	950	743	207	21.7895	30.0	12.0	1	1
Home 13	Subsidy	2024-11-01	2022/2023	April and October	2022-04-01	2023-10-01	76.21	16.74	16.53	42.95	140	159	64	157	408	11400	950	724	226	23.7895	31.0	13.0	1	1
Home 13	Subsidy	2024-12-01	2022/2023	April and October	2022-04-01	2023-10-01	86.21	19.47	23.79	42.95	179	185	95	226	408	11400	950	819	131	13.7895	32.0	14.0	1	1
Home 14	Control	2020-01-01					44.0	7.17	21.97	14.86	345	233	165	714	483	39000	3250	1430	1820	56			0	0
Home 14	Control	2020-02-01					39.2	6.8	17.54	14.86	348	221	116	570	483	39000	3250	1274	1976	60.8			0	0
Home 14	Control	2020-03-01					37.82	6.0	16.95	14.86	352	195	133	551	483	39000	3250	1229	2021	62.1846			0	0
Home 14	Control	2020-04-01					35.97	5.2	15.91	14.86	268	169	111	517	483	39000	3250	1169	2081	64.0308			0	0
Home 14	Control	2020-05-01					39.45	4.71	19.88	14.86	289	153	91	646	483	39000	3250	1282	1968	60.5538			0	0
Home 14	Control	2020-06-01					36.65	4.15	17.63	14.86	275	135	78	573	483	39000	3250	1191	2059	63.3538			0	0
Home 14	Control	2020-07-01					37.51	4.06	18.58	14.86	272	132	69	604	483	39000	3250	1219	2031	62.4923			0	0
Home 14	Control	2020-08-01					36.98	4.28	17.85	14.86	317	139	71	580	483	39000	3250	1202	2048	63.0154			0	0
Home 14	Control	2020-09-01					38.49	4.77	18.86	14.86	305	155	81	613	483	39000	3250	1251	1999	61.5077			0	0
Home 14	Control	2020-10-01					38.86	5.48	18.52	14.86	277	178	78	602	483	39000	3250	1263	1987	61.1385			0	0
Home 14	Control	2020-11-01					39.54	6.22	18.46	14.86	363	202	138	600	483	39000	3250	1285	1965	60.4615			0	0
Home 14	Control	2020-12-01					41.23	7.32	19.05	14.86	288	238	170	619	483	39000	3250	1340	1910	58.7692			0	0
Home 14	Control	2021-01-01					39.8	7.4	18.26	14.14	325	253	178	624	483	41000	3416.67	1360	2056.67	60.1951			0	0
Home 14	Control	2021-02-01					40.19	7.14	18.91	14.14	331	244	124	646	483	41000	3416.67	1373	2043.67	59.8146			0	0
Home 14	Control	2021-03-01					35.18	6.41	14.63	14.14	305	219	110	500	483	41000	3416.67	1202	2214.67	64.8195			0	0
Home 14	Control	2021-04-01					38.02	5.53	18.35	14.14	322	189	128	627	483	41000	3416.67	1299	2117.67	61.9805			0	0
Home 14	Control	2021-05-01					40.27	5.0	21.13	14.14	297	171	88	722	483	41000	3416.67	1376	2040.67	59.7268			0	0
Home 14	Control	2021-06-01					36.29	4.42	17.74	14.14	318	151	77	606	483	41000	3416.67	1240	2176.67	63.7073			0	0
Home 14	Control	2021-07-01					33.22	4.33	14.75	14.14	311	148	63	504	483	41000	3416.67	1135	2281.67	66.7805			0	0
Home 14	Control	2021-08-01					34.74	4.54	16.07	14.14	264	155	70	549	483	41000	3416.67	1187	2229.67	65.2585			0	0
Home 14	Control	2021-09-01					38.17	5.06	18.97	14.14	286	173	104	648	483	41000	3416.67	1304	2112.67	61.8341			0	0
Home 14	Control	2021-10-01					37.05	5.85	17.06	14.14	338	200	103	583	483	41000	3416.67	1266	2150.67	62.9463			0	0
Home 14	Control	2021-11-01					39.89	6.67	19.08	14.14	336	228	142	652	483	41000	3416.67	1363	2053.67	60.1073			0	0
Home 14	Control	2021-12-01					42.29	7.93	20.22	14.14	318	271	164	691	483	41000	3416.67	1445	1971.67	57.7073			0	0
Home 14	Control	2022-01-01					38.0	7.78	17.16	13.05	295	288	147	635	483	44400	3700	1406	2294	62			0	0
Home 14	Control	2022-02-01					36.84	7.51	16.27	13.05	303	278	132	602	483	44400	3700	1363	2337	63.1622			0	0
Home 14	Control	2022-03-01					38.81	6.78	18.97	13.05	267	251	124	702	483	44400	3700	1436	2264	61.1892			0	0
Home 14	Control	2022-04-01					37.68	5.95	18.68	13.05	330	220	88	691	483	44400	3700	1394	2306	62.3243			0	0
Home 14	Control	2022-05-01					36.92	5.24	18.62	13.05	269	194	98	689	483	44400	3700	1366	2334	63.0811			0	0
Home 14	Control	2022-06-01					38.76	4.7	21.0	13.05	280	174	52	777	483	44400	3700	1434	2266	61.2432			0	0
Home 14	Control	2022-07-01					37.22	4.59	19.57	13.05	310	170	54	724	483	44400	3700	1377	2323	62.7838			0	0
Home 14	Control	2022-08-01					35.62	4.78	17.78	13.05	281	177	57	658	483	44400	3700	1318	2382	64.3784			0	0
Home 14	Control	2022-09-01					36.54	5.38	18.11	13.05	296	199	101	670	483	44400	3700	1352	2348	63.4595			0	0
Home 14	Control	2022-10-01					37.81	6.19	18.57	13.05	280	229	105	687	483	44400	3700	1399	2301	62.1892			0	0
Home 14	Control	2022-11-01					39.32	7.08	19.19	13.05	293	262	150	710	483	44400	3700	1455	2245	60.6757			0	0
Home 14	Control	2022-12-01					45.32	8.35	23.92	13.05	296	309	121	885	483	44400	3700	1677	2023	54.6757			0	0
Home 14	Control	2023-01-01					49.04	10.03	26.13	12.88	298	376	135	980	483	45000	3750	1839	1911	50.96			0	0
Home 14	Control	2023-02-01					40.8	10.19	17.73	12.88	285	382	141	665	483	45000	3750	1530	2220	59.2			0	0
Home 14	Control	2023-03-01					38.43	9.17	16.37	12.88	281	344	98	614	483	45000	3750	1441	2309	61.5733			0	0
Home 14	Control	2023-04-01					38.69	7.95	17.87	12.88	272	298	100	670	483	45000	3750	1451	2299	61.3067			0	0
Home 14	Control	2023-05-01					41.63	7.09	21.65	12.88	269	266	56	812	483	45000	3750	1561	2189	58.3733			0	0
Home 14	Control	2023-06-01					42.56	6.35	23.33	12.88	271	238	70	875	483	45000	3750	1596	2154	57.44			0	0
Home 14	Control	2023-07-01					37.89	6.16	18.85	12.88	277	231	80	707	483	45000	3750	1421	2329	62.1067			0	0
Home 14	Control	2023-08-01					36.61	6.53	17.2	12.88	285	245	46	645	483	45000	3750	1373	2377	63.3867			0	0
Home 14	Control	2023-09-01					41.68	7.28	21.52	12.88	281	273	57	807	483	45000	3750	1563	2187	58.32			0	0
Home 14	Control	2023-10-01					43.49	8.37	22.24	12.88	286	314	117	834	483	45000	3750	1631	2119	56.5067			0	0
Home 14	Control	2023-11-01					46.69	9.63	24.19	12.88	295	361	150	907	483	45000	3750	1751	1999	53.3067			0	0
Home 14	Control	2023-12-01					43.41	11.23	19.31	12.88	300	421	111	724	483	45000	3750	1628	2122	56.5867			0	0
Home 14	Control	2024-01-01					40.57	10.62	17.62	12.33	329	416	155	690	483	47000	3916.67	1589	2327.67	59.4298			0	0
Home 14	Control	2024-02-01					34.6	9.88	12.38	12.33	269	387	153	485	483	47000	3916.67	1355	2561.67	65.4043			0	0
Home 14	Control	2024-03-01					37.74	8.78	16.62	12.33	265	344	99	651	483	47000	3916.67	1478	2438.67	62.2638			0	0
Home 14	Control	2024-04-01					39.24	7.61	19.3	12.33	250	298	88	756	483	47000	3916.67	1537	2379.67	60.7574			0	0
Home 14	Control	2024-05-01					41.77	6.87	22.57	12.33	281	269	71	884	483	47000	3916.67	1636	2280.67	58.2298			0	0
Home 14	Control	2024-06-01					36.71	6.13	18.26	12.33	282	240	59	715	483	47000	3916.67	1438	2478.67	63.2851			0	0
Home 14	Control	2024-07-01					35.06	6.0	16.72	12.33	218	235	66	655	483	47000	3916.67	1373	2543.67	64.9447			0	0
Home 14	Control	2024-08-01					32.2	6.31	13.56	12.33	272	247	77	531	483	47000	3916.67	1261	2655.67	67.8043			0	0
Home 14	Control	2024-09-01					37.3	6.94	18.03	12.33	285	272	134	706	483	47000	3916.67	1461	2455.67	62.6979			0	0
Home 14	Control	2024-10-01					39.52	8.02	19.17	12.33	325	314	91	751	483	47000	3916.67	1548	2368.67	60.4766			0	0
Home 14	Control	2024-11-01					42.23	9.14	20.76	12.33	256	358	185	813	483	47000	3916.67	1654	2262.67	57.7702			0	0
Home 14	Control	2024-12-01					42.51	10.7	19.48	12.33	267	419	173	763	483	47000	3916.67	1665	2251.67	57.4894			0	0
Home 15	Control	2020-01-01					57.47	9.08	14.85	33.54	178	140	122	229	517	18500	1541.67	886	655.667	42.5297			0	0
Home 15	Control	2020-02-01					56.24	8.56	14.14	33.54	170	132	128	218	517	18500	1541.67	867	674.667	43.7622			0	0
Home 15	Control	2020-03-01					57.6	7.59	16.48	33.54	183	117	78	254	517	18500	1541.67	888	653.667	42.4			0	0
Home 15	Control	2020-04-01					54.36	6.62	14.21	33.54	172	102	81	219	517	18500	1541.67	838	703.667	45.6432			0	0
Home 15	Control	2020-05-01					56.56	5.97	17.06	33.54	162	92	66	263	517	18500	1541.67	872	669.667	43.4378			0	0
Home 15	Control	2020-06-01					60.13	5.38	21.21	33.54	156	83	55	327	517	18500	1541.67	927	614.667	39.8703			0	0
Home 15	Control	2020-07-01					52.09	5.12	13.43	33.54	155	79	47	207	517	18500	1541.67	803	738.667	47.9135			0	0
Home 15	Control	2020-08-01					51.11	5.45	12.13	33.54	159	84	78	187	517	18500	1541.67	788	753.667	48.8865			0	0
Home 15	Control	2020-09-01					53.77	6.03	14.21	33.54	163	93	56	219	517	18500	1541.67	829	712.667	46.227			0	0
Home 15	Control	2020-10-01					57.86	7.01	17.32	33.54	181	108	74	267	517	18500	1541.67	892	649.667	42.1405			0	0
Home 15	Control	2020-11-01					56.17	7.98	14.66	33.54	150	123	89	226	517	18500	1541.67	866	675.667	43.827			0	0
Home 15	Control	2020-12-01					61.49	9.47	18.49	33.54	171	146	116	285	517	18500	1541.67	948	593.667	38.5081			0	0
Home 15	Control	2021-01-01					60.76	11.31	16.8	32.65	187	179	106	266	517	19000	1583.33	962	621.333	39.2421			0	0
Home 15	Control	2021-02-01					58.67	11.49	14.53	32.65	176	182	135	230	517	19000	1583.33	929	654.333	41.3263			0	0
Home 15	Control	2021-03-01					59.94	10.29	16.99	32.65	178	163	119	269	517	19000	1583.33	949	634.333	40.0632			0	0
Home 15	Control	2021-04-01					53.24	8.97	11.62	32.65	169	142	68	184	517	19000	1583.33	843	740.333	46.7579			0	0
Home 15	Control	2021-05-01					57.85	7.96	17.24	32.65	186	126	53	273	517	19000	1583.33	916	667.333	42.1474			0	0
Home 15	Control	2021-06-01					56.91	7.14	17.12	32.65	164	113	53	271	517	19000	1583.33	901	682.333	43.0947			0	0
Home 15	Control	2021-07-01					55.14	6.95	15.54	32.65	161	110	40	246	517	19000	1583.33	873	710.333	44.8632			0	0
Home 15	Control	2021-08-01					57.79	7.39	17.75	32.65	179	117	54	281	517	19000	1583.33	915	668.333	42.2105			0	0
Home 15	Control	2021-09-01					59.43	8.27	18.51	32.65	169	131	64	293	517	19000	1583.33	941	642.333	40.5684			0	0
Home 15	Control	2021-10-01					61.58	9.47	19.45	32.65	177	150	60	308	517	19000	1583.33	975	608.333	38.4211			0	0
Home 15	Control	2021-11-01					63.16	10.86	19.64	32.65	171	172	129	311	517	19000	1583.33	1000	583.333	36.8421			0	0
Home 15	Control	2021-12-01					62.21	12.63	16.93	32.65	184	200	170	268	517	19000	1583.33	985	598.333	37.7895			0	0
Home 15	Control	2022-01-01					59.17	12.06	16.55	30.56	215	204	106	280	517	20300	1691.67	1001	690.667	40.8276			0	0
Home 15	Control	2022-02-01					58.64	11.41	16.67	30.56	199	193	96	282	517	20300	1691.67	992	699.667	41.3596			0	0
Home 15	Control	2022-03-01					53.32	10.29	12.47	30.56	211	174	94	211	517	20300	1691.67	902	789.667	46.6798			0	0
Home 15	Control	2022-04-01					58.29	9.04	18.68	30.56	209	153	76	316	517	20300	1691.67	986	705.667	41.7143			0	0
Home 15	Control	2022-05-01					61.89	8.1	23.23	30.56	178	137	66	393	517	20300	1691.67	1047	644.667	38.1084			0	0
Home 15	Control	2022-06-01					56.51	7.21	18.74	30.56	190	122	67	317	517	20300	1691.67	956	735.667	43.4877			0	0
Home 15	Control	2022-07-01					52.43	6.98	14.9	30.56	230	118	40	252	517	20300	1691.67	887	804.667	47.5665			0	0
Home 15	Control	2022-08-01					53.62	7.33	15.72	30.56	198	124	40	266	517	20300	1691.67	907	784.667	46.3842			0	0
Home 15	Control	2022-09-01					54.33	8.1	15.67	30.56	219	137	45	265	517	20300	1691.67	919	772.667	45.6749			0	0
Home 15	Control	2022-10-01					61.18	9.46	21.16	30.56	209	160	66	358	517	20300	1691.67	1035	656.667	38.8177			0	0
Home 15	Control	2022-11-01					59.94	10.76	18.62	30.56	209	182	91	315	517	20300	1691.67	1014	677.667	40.0591			0	0
Home 15	Control	2022-12-01					63.67	12.71	20.39	30.56	233	215	163	345	517	20300	1691.67	1077	614.667	36.335			0	0
Home 15	Control	2023-01-01					57.6	10.94	17.8	28.86	187	196	88	319	517	21500	1791.67	1032	759.667	42.4			0	0
Home 15	Control	2023-02-01					52.35	9.82	13.67	28.86	168	176	95	245	517	21500	1791.67	938	853.667	47.6465			0	0
Home 15	Control	2023-03-01					52.02	8.76	14.4	28.86	163	157	75	258	517	21500	1791.67	932	859.667	47.9814			0	0
Home 15	Control	2023-04-01					55.76	7.65	19.26	28.86	160	137	83	345	517	21500	1791.67	999	792.667	44.2419			0	0
Home 15	Control	2023-05-01					53.3	6.81	17.64	28.86	158	122	94	316	517	21500	1791.67	955	836.667	46.6977			0	0
Home 15	Control	2023-06-01					47.44	6.14	12.45	28.86	159	110	35	223	517	21500	1791.67	850	941.667	52.5581			0	0
Home 15	Control	2023-07-01					55.09	6.03	20.2	28.86	165	108	32	362	517	21500	1791.67	987	804.667	44.9116			0	0
Home 15	Control	2023-08-01					57.82	6.31	22.66	28.86	167	113	51	406	517	21500	1791.67	1036	755.667	42.1767			0	0
Home 15	Control	2023-09-01					53.3	7.03	17.41	28.86	165	126	60	312	517	21500	1791.67	955	836.667	46.6977			0	0
Home 15	Control	2023-10-01					53.19	8.09	16.24	28.86	168	145	103	291	517	21500	1791.67	953	838.667	46.8093			0	0
Home 15	Control	2023-11-01					60.33	9.27	22.21	28.86	173	166	92	398	517	21500	1791.67	1081	710.667	39.6651			0	0
Home 15	Control	2023-12-01					57.82	10.88	18.08	28.86	177	195	93	324	517	21500	1791.67	1036	755.667	42.1767			0	0
Home 15	Control	2024-01-01					56.04	12.33	14.85	28.86	228	221	119	266	517	21500	1791.67	1004	787.667	43.9628			0	0
Home 15	Control	2024-02-01					53.86	12.45	12.56	28.86	184	223	129	225	517	21500	1791.67	965	826.667	46.1395			0	0
Home 15	Control	2024-03-01					55.42	11.05	15.52	28.86	179	198	101	278	517	21500	1791.67	993	798.667	44.5767			0	0
Home 15	Control	2024-04-01					62.18	9.6	23.72	28.86	166	172	75	425	517	21500	1791.67	1114	677.667	37.8233			0	0
Home 15	Control	2024-05-01					58.83	8.65	21.32	28.86	173	155	72	382	517	21500	1791.67	1054	737.667	41.1721			0	0
Home 15	Control	2024-06-01					54.25	7.76	17.64	28.86	208	139	59	316	517	21500	1791.67	972	819.667	45.7488			0	0
Home 15	Control	2024-07-01					53.75	7.48	17.41	28.86	187	134	56	312	517	21500	1791.67	963	828.667	46.2512			0	0
Home 15	Control	2024-08-01					57.6	7.87	20.87	28.86	212	141	50	374	517	21500	1791.67	1032	759.667	42.4			0	0
Home 15	Control	2024-09-01					55.26	8.82	17.58	28.86	174	158	53	315	517	21500	1791.67	990	801.667	44.7442			0	0
Home 15	Control	2024-10-01					52.58	10.1	13.62	28.86	179	181	73	244	517	21500	1791.67	942	849.667	47.4233			0	0
Home 15	Control	2024-11-01					58.05	11.44	17.75	28.86	194	205	115	318	517	21500	1791.67	1040	751.667	41.9535			0	0
Home 15	Control	2024-12-01					61.73	13.62	19.26	28.86	215	244	89	345	517	21500	1791.67	1106	685.667	38.2698			0	0
Home 16	Renovation	2020-01-01	2023	Jan			108.57	28.86	24.19	55.52	262	303	174	254	583	12600	1050	1140	-90	-8.57143			0	0
Home 16	Renovation	2020-02-01	2023	Jan			105.43	27.33	22.57	55.52	277	287	141	237	583	12600	1050	1107	-57	-5.42857			0	0
Home 16	Renovation	2020-03-01	2023	Jan			102.19	23.9	22.76	55.52	269	251	126	239	583	12600	1050	1073	-23	-2.19048			0	0
Home 16	Renovation	2020-04-01	2023	Jan			100.0	21.05	23.43	55.52	258	221	129	246	583	12600	1050	1050	0	0			0	0
Home 16	Renovation	2020-05-01	2023	Jan			100.0	18.86	25.62	55.52	260	198	87	269	583	12600	1050	1050	0	0			0	0
Home 16	Renovation	2020-06-01	2023	Jan			97.05	16.95	24.57	55.52	264	178	67	258	583	12600	1050	1019	31	2.95238			0	0
Home 16	Renovation	2020-07-01	2023	Jan			99.43	16.29	27.62	55.52	199	171	47	290	583	12600	1050	1044	6	0.571429			0	0
Home 16	Renovation	2020-08-01	2023	Jan			101.71	17.33	28.86	55.52	245	182	76	303	583	12600	1050	1068	-18	-1.71429			0	0
Home 16	Renovation	2020-09-01	2023	Jan			101.24	19.24	26.48	55.52	268	202	95	278	583	12600	1050	1063	-13	-1.2381			0	0
Home 16	Renovation	2020-10-01	2023	Jan			96.76	22.0	19.24	55.52	313	231	158	202	583	12600	1050	1016	34	3.2381			0	0
Home 16	Renovation	2020-11-01	2023	Jan			102.67	25.33	21.81	55.52	259	266	126	229	583	12600	1050	1078	-28	-2.66667			0	0
Home 16	Renovation	2020-12-01	2023	Jan			113.33	29.62	28.19	55.52	226	311	174	296	583	12600	1050	1190	-140	-13.3333			0	0
Home 16	Renovation	2021-01-01	2023	Jan			106.17	19.6	32.34	54.23	299	214	124	353	592	13100	1091.67	1159	-67.3333	-6.16794			0	0
Home 16	Renovation	2021-02-01	2023	Jan			92.15	14.56	23.36	54.23	240	159	114	255	592	13100	1091.67	1006	85.6667	7.84733			0	0
Home 16	Renovation	2021-03-01	2023	Jan			94.53	12.82	27.48	54.23	273	140	70	300	592	13100	1091.67	1032	59.6667	5.46565			0	0
Home 16	Renovation	2021-04-01	2023	Jan			95.08	11.27	29.59	54.23	262	123	61	323	592	13100	1091.67	1038	53.6667	4.91603			0	0
Home 16	Renovation	2021-05-01	2023	Jan			90.69	10.08	26.38	54.23	251	110	54	288	592	13100	1091.67	990	101.667	9.31298			0	0
Home 16	Renovation	2021-06-01	2023	Jan			85.74	8.98	22.53	54.23	206	98	39	246	592	13100	1091.67	936	155.667	14.2595			0	0
Home 16	Renovation	2021-07-01	2023	Jan			96.18	8.7	33.25	54.23	237	95	31	363	592	13100	1091.67	1050	41.6667	3.81679			0	0
Home 16	Renovation	2021-08-01	2023	Jan			87.21	9.25	23.73	54.23	218	101	39	259	592	13100	1091.67	952	139.667	12.7939			0	0
Home 16	Renovation	2021-09-01	2023	Jan			88.4	10.35	23.82	54.23	262	113	58	260	592	13100	1091.67	965	126.667	11.6031			0	0
Home 16	Renovation	2021-10-01	2023	Jan			92.7	11.82	26.66	54.23	241	129	50	291	592	13100	1091.67	1012	79.6667	7.29771			0	0
Home 16	Renovation	2021-11-01	2023	Jan			93.89	13.47	26.2	54.23	223	147	77	286	592	13100	1091.67	1025	66.6667	6.10687			0	0
Home 16	Renovation	2021-12-01	2023	Jan			95.18	15.76	25.19	54.23	288	172	84	275	592	13100	1091.67	1039	52.6667	4.82443			0	0
Home 16	Renovation	2022-01-01	2023	Jan			104.42	13.98	37.17	53.27	194	158	113	420	602	13560	1130	1180	-50	-4.42478			0	0
Home 16	Renovation	2022-02-01	2023	Jan			98.05	12.48	32.3	53.27	216	141	60	365	602	13560	1130	1108	22	1.9469			0	0
Home 16	Renovation	2022-03-01	2023	Jan			99.03	11.15	34.6	53.27	200	126	61	391	602	13560	1130	1119	11	0.973451			0	0
Home 16	Renovation	2022-04-01	2023	Jan			93.89	9.73	30.88	53.27	216	110	58	349	602	13560	1130	1061	69	6.10619			0	0
Home 16	Renovation	2022-05-01	2023	Jan			93.54	8.67	31.59	53.27	214	98	60	357	602	13560	1130	1057	73	6.46018			0	0
Home 16	Renovation	2022-06-01	2023	Jan			98.14	7.79	37.08	53.27	200	88	35	419	602	13560	1130	1109	21	1.85841			0	0
Home 16	Renovation	2022-07-01	2023	Jan			90.8	7.52	30.0	53.27	195	85	29	339	602	13560	1130	1026	104	9.20354			0	0
Home 16	Renovation	2022-08-01	2023	Jan			91.77	7.88	30.62	53.27	192	89	49	346	602	13560	1130	1037	93	8.23009			0	0
Home 16	Renovation	2022-09-01	2023	Jan			95.58	8.85	33.45	53.27	185	100	35	378	602	13560	1130	1080	50	4.42478			0	0
Home 16	Renovation	2022-10-01	2023	Jan			98.5	10.35	34.87	53.27	199	117	39	394	602	13560	1130	1113	17	1.50442			0	0
Home 16	Renovation	2022-11-01	2023	Jan			100.27	11.77	35.22	53.27	221	133	77	398	602	13560	1130	1133	-3	-0.265487			0	0
Home 16	Renovation	2022-12-01	2023	Jan			97.52	13.81	30.44	53.27	257	156	83	344	602	13560	1130	1102	28	2.47788			0	0
Home 16	Renovation	2023-01-01	2023	Jan			89.23	12.88	25.69	50.66	204	161	84	321	633	14995	1249.58	1115	134.583	10.7703			0	0
Home 16	Renovation	2023-02-01	2023	Jan			89.87	12.4	26.81	50.66	194	155	111	335	633	14995	1249.58	1123	126.583	10.13			0	0
Home 16	Renovation	2023-03-01	2023	Jan			98.91	10.88	37.37	50.66	186	136	87	467	633	14995	1249.58	1236	13.5833	1.08703			0	0
Home 16	Renovation	2023-04-01	2023	Jan			97.63	9.6	37.37	50.66	184	120	55	467	633	14995	1249.58	1220	29.5833	2.36746			0	0
Home 16	Renovation	2023-05-01	2023	Jan			93.63	8.56	34.41	50.66	181	107	36	430	633	14995	1249.58	1170	79.5833	6.36879			0	0
Home 16	Renovation	2023-06-01	2023	Jan			92.59	7.68	34.25	50.66	183	96	45	428	633	14995	1249.58	1157	92.5833	7.40914			0	0
Home 16	Renovation	2023-07-01	2023	Jan			82.59	7.52	24.41	50.66	188	94	37	305	633	14995	1249.58	1032	217.583	17.4125			0	0
Home 16	Renovation	2023-08-01	2023	Jan			93.31	7.92	34.73	50.66	193	99	31	434	633	14995	1249.58	1166	83.5833	6.6889			0	0
Home 16	Renovation	2023-09-01	2023	Jan			83.87	8.72	24.49	50.66	189	109	61	306	633	14995	1249.58	1048	201.583	16.132			0	0
Home 16	Renovation	2023-10-01	2023	Jan			98.19	10.24	37.29	50.66	195	128	36	466	633	14995	1249.58	1227	22.5833	1.80727			0	0
Home 16	Renovation	2023-11-01	2023	Jan			92.91	11.52	30.73	50.66	198	144	32	384	633	14995	1249.58	1161	88.5833	7.08903			0	0
Home 16	Renovation	2023-12-01	2023	Jan			100.83	13.6	36.57	50.66	204	170	46	457	633	14995	1249.58	1260	-10.4167	-0.833611			0	0
Home 16	Renovation	2024-01-01	2023	Jan			96.02	12.77	31.3	51.94	241	164	97	402	667	15410	1284.17	1233	51.1667	3.98443			0	0
Home 16	Renovation	2024-02-01	2023	Jan			95.94	11.91	32.08	51.94	241	153	91	412	667	15410	1284.17	1232	52.1667	4.0623			0	0
Home 16	Renovation	2024-03-01	2023	Jan			89.71	10.59	27.18	51.94	219	136	72	349	667	15410	1284.17	1152	132.167	10.292			0	0
Home 16	Renovation	2024-04-01	2023	Jan			93.37	9.19	32.24	51.94	222	118	64	414	667	15410	1284.17	1199	85.1667	6.63206			0	0
Home 16	Renovation	2024-05-01	2023	Jan			93.68	8.25	33.48	51.94	167	106	34	430	667	15410	1284.17	1203	81.1667	6.32057			0	0
Home 16	Renovation	2024-06-01	2023	Jan			94.46	7.32	35.2	51.94	188	94	48	452	667	15410	1284.17	1213	71.1667	5.54186			0	0
Home 16	Renovation	2024-07-01	2023	Jan			96.79	7.09	37.77	51.94	216	91	28	485	667	15410	1284.17	1243	41.1667	3.20571			0	0
Home 16	Renovation	2024-08-01	2023	Jan			96.72	7.48	37.3	51.94	218	96	39	479	667	15410	1284.17	1242	42.1667	3.28358			0	0
Home 16	Renovation	2024-09-01	2023	Jan			95.86	8.33	35.59	51.94	195	107	38	457	667	15410	1284.17	1231	53.1667	4.14017			0	0
Home 16	Renovation	2024-10-01	2023	Jan			91.42	9.66	29.82	51.94	184	124	47	383	667	15410	1284.17	1174	110.167	8.57884			0	0
Home 16	Renovation	2024-11-01	2023	Jan			89.79	11.06	26.79	51.94	212	142	50	344	667	15410	1284.17	1153	131.167	10.2141			0	0
Home 16	Renovation	2024-12-01	2023	Jan			95.39	12.93	30.53	51.94	209	166	56	392	667	15410	1284.17	1225	59.1667	4.6074			0	0
Home 17	Control	2020-01-01					77.49	10.48	34.71	32.31	192	227	78	752	700	26000	2166.67	1679	487.667	22.5077			0	0
Home 17	Control	2020-02-01					70.62	9.74	28.57	32.31	188	211	80	619	700	26000	2166.67	1530	636.667	29.3846			0	0
Home 17	Control	2020-03-01					73.8	8.77	32.72	32.31	196	190	55	709	700	26000	2166.67	1599	567.667	26.2			0	0
Home 17	Control	2020-04-01					70.98	7.57	31.11	32.31	182	164	48	674	700	26000	2166.67	1538	628.667	29.0154			0	0
Home 17	Control	2020-05-01					66.92	6.74	27.88	32.31	166	146	35	604	700	26000	2166.67	1450	716.667	33.0769			0	0
Home 17	Control	2020-06-01					67.02	6.09	28.62	32.31	169	132	36	620	700	26000	2166.67	1452	714.667	32.9846			0	0
Home 17	Control	2020-07-01					63.69	5.91	25.48	32.31	188	128	23	552	700	26000	2166.67	1380	786.667	36.3077			0	0
Home 17	Control	2020-08-01					69.65	6.18	31.15	32.31	164	134	38	675	700	26000	2166.67	1509	657.667	30.3538			0	0
Home 17	Control	2020-09-01					71.17	6.97	31.89	32.31	174	151	35	691	700	26000	2166.67	1542	624.667	28.8308			0	0
Home 17	Control	2020-10-01					70.48	7.98	30.18	32.31	176	173	35	654	700	26000	2166.67	1527	639.667	29.5231			0	0
Home 17	Control	2020-11-01					76.94	9.05	35.58	32.31	180	196	56	771	700	26000	2166.67	1667	499.667	23.0615			0	0
Home 17	Control	2020-12-01					72.09	10.71	29.08	32.31	176	232	62	630	700	26000	2166.67	1562	604.667	27.9077			0	0
Home 17	Control	2021-01-01					66.62	9.72	27.93	28.97	184	235	97	675	700	29000	2416.67	1610	806.667	33.3793			0	0
Home 17	Control	2021-02-01					62.77	9.19	24.62	28.97	160	222	70	595	700	29000	2416.67	1517	899.667	37.2276			0	0
Home 17	Control	2021-03-01					66.83	8.19	29.67	28.97	187	198	61	717	700	29000	2416.67	1615	801.667	33.1724			0	0
Home 17	Control	2021-04-01					61.61	7.2	25.45	28.97	176	174	38	615	700	29000	2416.67	1489	927.667	38.3862			0	0
Home 17	Control	2021-05-01					67.32	6.5	31.86	28.97	161	157	41	770	700	29000	2416.67	1627	789.667	32.6759			0	0
Home 17	Control	2021-06-01					65.96	5.79	31.2	28.97	156	140	23	754	700	29000	2416.67	1594	822.667	34.0414			0	0
Home 17	Control	2021-07-01					64.92	5.59	30.37	28.97	149	135	24	734	700	29000	2416.67	1569	847.667	35.0759			0	0
Home 17	Control	2021-08-01					64.97	5.88	30.12	28.97	158	142	40	728	700	29000	2416.67	1570	846.667	35.0345			0	0
Home 17	Control	2021-09-01					65.38	6.5	29.92	28.97	172	157	51	723	700	29000	2416.67	1580	836.667	34.6207			0	0
Home 17	Control	2021-10-01					66.37	7.61	29.79	28.97	158	184	62	720	700	29000	2416.67	1604	812.667	33.6276			0	0
Home 17	Control	2021-11-01					68.44	8.65	30.83	28.97	184	209	59	745	700	29000	2416.67	1654	762.667	31.5586			0	0
Home 17	Control	2021-12-01					69.02	10.18	29.88	28.97	185	246	89	722	700	29000	2416.67	1668	748.667	30.9793			0	0
Home 17	Control	2022-01-01					61.65	9.45	25.95	26.25	195	252	59	692	700	32000	2666.67	1644	1022.67	38.35			0	0
Home 17	Control	2022-02-01					64.72	8.93	29.55	26.25	204	238	33	788	700	32000	2666.67	1726	940.667	35.275			0	0
Home 17	Control	2022-03-01					66.38	7.88	32.25	26.25	183	210	45	860	700	32000	2666.67	1770	896.667	33.625			0	0
Home 17	Control	2022-04-01					65.44	6.98	32.21	26.25	183	186	33	859	700	32000	2666.67	1745	921.667	34.5625			0	0
Home 17	Control	2022-05-01					70.54	6.22	38.06	26.25	208	166	22	1015	700	32000	2666.67	1881	785.667	29.4625			0	0
Home 17	Control	2022-06-01					60.86	5.51	29.1	26.25	192	147	18	776	700	32000	2666.67	1623	1043.67	39.1375			0	0
Home 17	Control	2022-07-01					58.05	5.44	26.36	26.25	185	145	17	703	700	32000	2666.67	1548	1118.67	41.95			0	0
Home 17	Control	2022-08-01					61.16	5.66	29.25	26.25	182	151	12	780	700	32000	2666.67	1631	1035.67	38.8375			0	0
Home 17	Control	2022-09-01					62.03	6.38	29.4	26.25	185	170	22	784	700	32000	2666.67	1654	1012.67	37.975			0	0
Home 17	Control	2022-10-01					61.31	7.28	27.79	26.25	189	194	25	741	700	32000	2666.67	1635	1031.67	38.6875			0	0
Home 17	Control	2022-11-01					61.88	8.33	27.3	26.25	185	222	30	728	700	32000	2666.67	1650	1016.67	38.125			0	0
Home 17	Control	2022-12-01					68.81	9.75	32.81	26.25	208	260	43	875	700	32000	2666.67	1835	831.667	31.1875			0	0
Home 17	Control	2023-01-01					62.4	8.4	30.0	24.0	167	245	93	875	700	35000	2916.67	1820	1096.67	37.6			0	0
Home 17	Control	2023-02-01					56.85	7.65	25.2	24.0	146	223	76	735	700	35000	2916.67	1658	1258.67	43.1543			0	0
Home 17	Control	2023-03-01					55.99	6.75	25.23	24.0	142	197	47	736	700	35000	2916.67	1633	1283.67	44.0114			0	0
Home 17	Control	2023-04-01					63.12	5.97	33.15	24.0	140	174	51	967	700	35000	2916.67	1841	1075.67	36.88			0	0
Home 17	Control	2023-05-01					63.7	5.28	34.42	24.0	137	154	52	1004	700	35000	2916.67	1858	1058.67	36.2971			0	0
Home 17	Control	2023-06-01					56.06	4.77	27.29	24.0	140	139	36	796	700	35000	2916.67	1635	1281.67	43.9429			0	0
Home 17	Control	2023-07-01					59.55	4.59	30.96	24.0	141	134	27	903	700	35000	2916.67	1737	1179.67	40.4457			0	0
Home 17	Control	2023-08-01					63.84	4.9	34.94	24.0	146	143	24	1019	700	35000	2916.67	1862	1054.67	36.16			0	0
Home 17	Control	2023-09-01					61.78	5.42	32.37	24.0	143	158	43	944	700	35000	2916.67	1802	1114.67	38.2171			0	0
Home 17	Control	2023-10-01					71.76	6.27	41.49	24.0	146	183	51	1210	700	35000	2916.67	2093	823.667	28.24			0	0
Home 17	Control	2023-11-01					55.92	7.1	24.82	24.0	149	207	72	724	700	35000	2916.67	1631	1285.67	44.08			0	0
Home 17	Control	2023-12-01					58.11	8.33	25.78	24.0	153	243	85	752	700	35000	2916.67	1695	1221.67	41.8857			0	0
Home 17	Control	2024-01-01					56.49	6.82	27.57	22.11	176	216	93	873	700	38000	3166.67	1789	1377.67	43.5053			0	0
Home 17	Control	2024-02-01					53.94	6.06	25.77	22.11	153	192	56	816	700	38000	3166.67	1708	1458.67	46.0632			0	0
Home 17	Control	2024-03-01					49.89	5.43	22.36	22.11	164	172	75	708	700	38000	3166.67	1580	1586.67	50.1053			0	0
Home 17	Control	2024-04-01					56.84	4.71	30.03	22.11	138	149	45	951	700	38000	3166.67	1800	1366.67	43.1579			0	0
Home 17	Control	2024-05-01					48.73	4.2	22.42	22.11	147	133	59	710	700	38000	3166.67	1543	1623.67	51.2737			0	0
Home 17	Control	2024-06-01					53.56	3.82	27.63	22.11	133	121	24	875	700	38000	3166.67	1696	1470.67	46.4421			0	0
Home 17	Control	2024-07-01					50.37	3.63	24.63	22.11	142	115	39	780	700	38000	3166.67	1595	1571.67	49.6316			0	0
Home 17	Control	2024-08-01					48.06	3.82	22.14	22.11	149	121	29	701	700	38000	3166.67	1522	1644.67	51.9368			0	0
Home 17	Control	2024-09-01					49.77	4.33	23.34	22.11	160	137	30	739	700	38000	3166.67	1576	1590.67	50.2316			0	0
Home 17	Control	2024-10-01					57.85	4.96	30.79	22.11	145	157	41	975	700	38000	3166.67	1832	1334.67	42.1474			0	0
Home 17	Control	2024-11-01					51.19	5.59	23.49	22.11	166	177	51	744	700	38000	3166.67	1621	1545.67	48.8105			0	0
Home 17	Control	2024-12-01					64.42	6.69	35.62	22.11	148	212	80	1128	700	38000	3166.67	2040	1126.67	35.5789			0	0
Home 18	Renovation	2020-01-01	2022	February	2022-02-01		49.67	10.51	16.24	22.92	287	359	328	555	783	41000	3416.67	1697	1719.67	50.3317	-25.0		0	0
Home 18	Renovation	2020-02-01	2022	February	2022-02-01		51.07	9.89	18.26	22.92	331	338	249	624	783	41000	3416.67	1745	1671.67	48.9268	-24.0		0	0
Home 18	Renovation	2020-03-01	2022	February	2022-02-01		47.68	8.75	16.01	22.92	267	299	230	547	783	41000	3416.67	1629	1787.67	52.322	-23.0		0	0
Home 18	Renovation	2020-04-01	2022	February	2022-02-01		49.9	7.7	19.29	22.92	236	263	276	659	783	41000	3416.67	1705	1711.67	50.0976	-22.0		0	0
Home 18	Renovation	2020-05-01	2022	February	2022-02-01		46.42	6.88	16.62	22.92	280	235	211	568	783	41000	3416.67	1586	1830.67	53.5805	-21.0		0	0
Home 18	Renovation	2020-06-01	2022	February	2022-02-01		51.37	6.09	22.36	22.92	261	208	130	764	783	41000	3416.67	1755	1661.67	48.6341	-20.0		0	0
Home 18	Renovation	2020-07-01	2022	February	2022-02-01		46.13	5.94	17.27	22.92	265	203	110	590	783	41000	3416.67	1576	1840.67	53.8732	-19.0		0	0
Home 18	Renovation	2020-08-01	2022	February	2022-02-01		49.58	6.26	20.4	22.92	287	214	123	697	783	41000	3416.67	1694	1722.67	50.4195	-18.0		0	0
Home 18	Renovation	2020-09-01	2022	February	2022-02-01		49.02	6.97	19.14	22.92	250	238	171	654	783	41000	3416.67	1675	1741.67	50.9756	-17.0		0	0
Home 18	Renovation	2020-10-01	2022	February	2022-02-01		49.7	8.08	18.7	22.92	256	276	164	639	783	41000	3416.67	1698	1718.67	50.3024	-16.0		0	0
Home 18	Renovation	2020-11-01	2022	February	2022-02-01		47.27	9.22	15.13	22.92	289	315	232	517	783	41000	3416.67	1615	1801.67	52.7317	-15.0		0	0
Home 18	Renovation	2020-12-01	2022	February	2022-02-01		53.71	10.74	20.05	22.92	310	367	227	685	783	41000	3416.67	1835	1581.67	46.2927	-14.0		0	0
Home 18	Renovation	2021-01-01	2022	February	2022-02-01		47.55	10.74	14.71	22.1	306	385	297	527	792	43000	3583.33	1704	1879.33	52.4465	-13.0		0	0
Home 18	Renovation	2021-02-01	2022	February	2022-02-01		47.92	10.38	15.43	22.1	296	372	280	553	792	43000	3583.33	1717	1866.33	52.0837	-12.0		0	0
Home 18	Renovation	2021-03-01	2022	February	2022-02-01		49.23	9.21	17.92	22.1	303	330	192	642	792	43000	3583.33	1764	1819.33	50.7721	-11.0		0	0
Home 18	Renovation	2021-04-01	2022	February	2022-02-01		53.55	8.07	23.39	22.1	299	289	225	838	792	43000	3583.33	1919	1664.33	46.4465	-10.0		0	0
Home 18	Renovation	2021-05-01	2022	February	2022-02-01		50.9	7.17	21.63	22.1	249	257	111	775	792	43000	3583.33	1824	1759.33	49.0977	-9.0		0	0
Home 18	Renovation	2021-06-01	2022	February	2022-02-01		46.86	6.42	18.33	22.1	253	230	84	657	792	43000	3583.33	1679	1904.33	53.1442	-8.0		0	0
Home 18	Renovation	2021-07-01	2022	February	2022-02-01		46.55	6.22	18.22	22.1	272	223	103	653	792	43000	3583.33	1668	1915.33	53.4512	-7.0		0	0
Home 18	Renovation	2021-08-01	2022	February	2022-02-01		45.4	6.64	16.66	22.1	294	238	134	597	792	43000	3583.33	1627	1956.33	54.5953	-6.0		0	0
Home 18	Renovation	2021-09-01	2022	February	2022-02-01		44.82	7.45	15.27	22.1	338	267	190	547	792	43000	3583.33	1606	1977.33	55.1814	-5.0		0	0
Home 18	Renovation	2021-10-01	2022	February	2022-02-01		48.64	8.57	17.97	22.1	288	307	167	644	792	43000	3583.33	1743	1840.33	51.3581	-4.0		0	0
Home 18	Renovation	2021-11-01	2022	February	2022-02-01		48.17	9.74	16.33	22.1	303	349	269	585	792	43000	3583.33	1726	1857.33	51.8326	-3.0		0	0
Home 18	Renovation	2021-12-01	2022	February	2022-02-01		56.46	11.41	22.94	22.1	290	409	277	822	792	43000	3583.33	2023	1560.33	43.5442	-2.0		0	0
Home 18	Renovation	2022-01-01	2022	February	2022-02-01		62.75	13.36	26.72	22.67	364	501	260	1002	850	45000	3750	2353	1397	37.2533	-1.0		0	0
Home 18	Renovation	2022-02-01	2022	February	2022-02-01		59.15	9.79	26.69	22.67	314	367	197	1001	850	45000	3750	2218	1532	40.8533	0.0		1	0
Home 18	Renovation	2022-03-01	2022	February	2022-02-01		50.8	8.61	19.52	22.67	339	323	157	732	850	45000	3750	1905	1845	49.2	1.0		1	0
Home 18	Renovation	2022-04-01	2022	February	2022-02-01		50.05	7.55	19.84	22.67	300	283	85	744	850	45000	3750	1877	1873	49.9467	2.0		1	0
Home 18	Renovation	2022-05-01	2022	February	2022-02-01		48.03	6.77	18.59	22.67	271	254	122	697	850	45000	3750	1801	1949	51.9733	3.0		1	0
Home 18	Renovation	2022-06-01	2022	February	2022-02-01		51.89	6.0	23.23	22.67	391	225	94	871	850	45000	3750	1946	1804	48.1067	4.0		1	0
Home 18	Renovation	2022-07-01	2022	February	2022-02-01		48.13	5.87	19.6	22.67	336	220	60	735	850	45000	3750	1805	1945	51.8667	5.0		1	0
Home 18	Renovation	2022-08-01	2022	February	2022-02-01		49.07	6.21	20.19	22.67	341	233	80	757	850	45000	3750	1840	1910	50.9333	6.0		1	0
Home 18	Renovation	2022-09-01	2022	February	2022-02-01		48.93	6.93	19.33	22.67	351	260	103	725	850	45000	3750	1835	1915	51.0667	7.0		1	0
Home 18	Renovation	2022-10-01	2022	February	2022-02-01		50.51	7.92	19.92	22.67	374	297	126	747	850	45000	3750	1894	1856	49.4933	8.0		1	0
Home 18	Renovation	2022-11-01	2022	February	2022-02-01		57.84	8.96	26.21	22.67	346	336	132	983	850	45000	3750	2169	1581	42.16	9.0		1	0
Home 18	Renovation	2022-12-01	2022	February	2022-02-01		50.48	10.56	17.25	22.67	377	396	164	647	850	45000	3750	1893	1857	49.52	10.0		1	0
Home 18	Renovation	2023-01-01	2022	February	2022-02-01		53.44	10.44	20.45	22.54	354	409	235	801	883	47000	3916.67	2093	1823.67	46.5617	11.0		1	0
Home 18	Renovation	2023-02-01	2022	February	2022-02-01		48.79	10.16	16.09	22.54	348	398	287	630	883	47000	3916.67	1911	2005.67	51.2085	12.0		1	0
Home 18	Renovation	2023-03-01	2022	February	2022-02-01		60.49	8.99	28.95	22.54	338	352	218	1134	883	47000	3916.67	2369	1547.67	39.5149	13.0		1	0
Home 18	Renovation	2023-04-01	2022	February	2022-02-01		52.37	7.79	22.03	22.54	327	305	132	863	883	47000	3916.67	2051	1865.67	47.634	14.0		1	0
Home 18	Renovation	2023-05-01	2022	February	2022-02-01		45.6	6.94	16.11	22.54	322	272	136	631	883	47000	3916.67	1786	2130.67	54.4	15.0		1	0
Home 18	Renovation	2023-06-01	2022	February	2022-02-01		46.21	6.31	17.36	22.54	331	247	41	680	883	47000	3916.67	1810	2106.67	53.7872	16.0		1	0
Home 18	Renovation	2023-07-01	2022	February	2022-02-01		46.29	6.1	17.64	22.54	336	239	97	691	883	47000	3916.67	1813	2103.67	53.7106	17.0		1	0
Home 18	Renovation	2023-08-01	2022	February	2022-02-01		52.98	6.38	24.05	22.54	341	250	48	942	883	47000	3916.67	2075	1841.67	47.0213	18.0		1	0
Home 18	Renovation	2023-09-01	2022	February	2022-02-01		56.02	7.2	26.27	22.54	342	282	81	1029	883	47000	3916.67	2194	1722.67	43.983	19.0		1	0
Home 18	Renovation	2023-10-01	2022	February	2022-02-01		50.45	8.2	19.71	22.54	342	321	79	772	883	47000	3916.67	1976	1940.67	49.5489	20.0		1	0
Home 18	Renovation	2023-11-01	2022	February	2022-02-01		50.81	9.4	18.87	22.54	353	368	78	739	883	47000	3916.67	1990	1926.67	49.1915	21.0		1	0
Home 18	Renovation	2023-12-01	2022	February	2022-02-01		58.88	11.13	25.2	22.54	365	436	168	987	883	47000	3916.67	2306	1610.67	41.1234	22.0		1	0
Home 18	Renovation	2024-01-01	2022	February	2022-02-01		50.74	10.19	18.1	22.46	344	416	220	739	917	49000	4083.33	2072	2011.33	49.2571	23.0		1	0
Home 18	Renovation	2024-02-01	2022	February	2022-02-01		51.53	9.48	19.59	22.46	351	387	237	800	917	49000	4083.33	2104	1979.33	48.4735	24.0		1	0
Home 18	Renovation	2024-03-01	2022	February	2022-02-01		49.96	8.38	19.13	22.46	302	342	189	781	917	49000	4083.33	2040	2043.33	50.0408	25.0		1	0
Home 18	Renovation	2024-04-01	2022	February	2022-02-01		45.7	7.3	15.94	22.46	341	298	166	651	917	49000	4083.33	1866	2217.33	54.302	26.0		1	0
Home 18	Renovation	2024-05-01	2022	February	2022-02-01		52.97	6.54	23.98	22.46	312	267	117	979	917	49000	4083.33	2163	1920.33	47.0286	27.0		1	0
Home 18	Renovation	2024-06-01	2022	February	2022-02-01		45.09	5.78	16.85	22.46	317	236	61	688	917	49000	4083.33	1841	2242.33	54.9143	28.0		1	0
Home 18	Renovation	2024-07-01	2022	February	2022-02-01		55.0	5.71	26.84	22.46	348	233	95	1096	917	49000	4083.33	2246	1837.33	44.9959	29.0		1	0
Home 18	Renovation	2024-08-01	2022	February	2022-02-01		51.82	5.95	23.41	22.46	332	243	66	956	917	49000	4083.33	2116	1967.33	48.1796	30.0		1	0
Home 18	Renovation	2024-09-01	2022	February	2022-02-01		48.59	6.71	19.42	22.46	363	274	61	793	917	49000	4083.33	1984	2099.33	51.4122	31.0		1	0
Home 18	Renovation	2024-10-01	2022	February	2022-02-01		44.96	7.67	14.84	22.46	314	313	95	606	917	49000	4083.33	1836	2247.33	55.0367	32.0		1	0
Home 18	Renovation	2024-11-01	2022	February	2022-02-01		56.52	8.72	25.35	22.46	352	356	156	1035	917	49000	4083.33	2308	1775.33	43.4776	33.0		1	0
Home 18	Renovation	2024-12-01	2022	February	2022-02-01		54.2	10.33	21.4	22.46	326	422	156	874	917	49000	4083.33	2213	1870.33	45.8041	34.0		1	0
Home 19	Control	2020-01-01					80.98	8.28	22.37	50.32	71	107	88	289	650	15500	1291.67	1046	245.667	19.0194			0	0
Home 19	Control	2020-02-01					81.14	7.82	22.99	50.32	70	101	81	297	650	15500	1291.67	1048	243.667	18.8645			0	0
Home 19	Control	2020-03-01					75.72	6.89	18.5	50.32	66	89	68	239	650	15500	1291.67	978	313.667	24.2839			0	0
Home 19	Control	2020-04-01					76.65	6.04	20.28	50.32	65	78	85	262	650	15500	1291.67	990	301.667	23.3548			0	0
Home 19	Control	2020-05-01					77.03	5.34	21.37	50.32	69	69	51	276	650	15500	1291.67	995	296.667	22.9677			0	0
Home 19	Control	2020-06-01					76.88	4.8	21.75	50.32	62	62	41	281	650	15500	1291.67	993	298.667	23.1226			0	0
Home 19	Control	2020-07-01					77.11	4.65	22.14	50.32	63	60	41	286	650	15500	1291.67	996	295.667	22.8903			0	0
Home 19	Control	2020-08-01					79.97	4.95	24.7	50.32	71	64	40	319	650	15500	1291.67	1033	258.667	20.0258			0	0
Home 19	Control	2020-09-01					75.17	5.57	19.28	50.32	74	72	46	249	650	15500	1291.67	971	320.667	24.8258			0	0
Home 19	Control	2020-10-01					77.65	6.35	20.98	50.32	73	82	60	271	650	15500	1291.67	1003	288.667	22.3484			0	0
Home 19	Control	2020-11-01					75.41	7.28	17.81	50.32	78	94	75	230	650	15500	1291.67	974	317.667	24.5935			0	0
Home 19	Control	2020-12-01					82.14	8.44	23.38	50.32	79	109	95	302	650	15500	1291.67	1061	230.667	17.8581			0	0
Home 19	Control	2021-01-01					77.23	8.92	17.69	50.62	70	116	108	230	658	15600	1300	1004	296	22.7692			0	0
Home 19	Control	2021-02-01					81.62	8.62	22.38	50.62	79	112	90	291	658	15600	1300	1061	239	18.3846			0	0
Home 19	Control	2021-03-01					83.62	7.69	25.31	50.62	76	100	85	329	658	15600	1300	1087	213	16.3846			0	0
Home 19	Control	2021-04-01					80.92	6.77	23.54	50.62	66	88	59	306	658	15600	1300	1052	248	19.0769			0	0
Home 19	Control	2021-05-01					76.15	5.92	19.62	50.62	66	77	49	255	658	15600	1300	990	310	23.8462			0	0
Home 19	Control	2021-06-01					76.23	5.31	20.31	50.62	62	69	27	264	658	15600	1300	991	309	23.7692			0	0
Home 19	Control	2021-07-01					80.08	5.23	24.23	50.62	64	68	42	315	658	15600	1300	1041	259	19.9231			0	0
Home 19	Control	2021-08-01					78.31	5.46	22.23	50.62	59	71	42	289	658	15600	1300	1018	282	21.6923			0	0
Home 19	Control	2021-09-01					73.85	6.08	17.15	50.62	64	79	58	223	658	15600	1300	960	340	26.1538			0	0
Home 19	Control	2021-10-01					83.92	7.15	26.15	50.62	71	93	38	340	658	15600	1300	1091	209	16.0769			0	0
Home 19	Control	2021-11-01					81.38	8.0	22.77	50.62	65	104	113	296	658	15600	1300	1058	242	18.6154			0	0
Home 19	Control	2021-12-01					80.23	9.38	20.23	50.62	70	122	96	263	658	15600	1300	1043	257	19.7692			0	0
Home 19	Control	2022-01-01					82.56	9.72	21.87	50.96	70	128	122	288	671	15800	1316.67	1087	229.667	17.443			0	0
Home 19	Control	2022-02-01					88.03	9.27	27.8	50.96	66	122	77	366	671	15800	1316.67	1159	157.667	11.9747			0	0
Home 19	Control	2022-03-01					80.51	8.2	21.34	50.96	72	108	87	281	671	15800	1316.67	1060	256.667	19.4937			0	0
Home 19	Control	2022-04-01					79.52	7.22	21.34	50.96	68	95	53	281	671	15800	1316.67	1047	269.667	20.481			0	0
Home 19	Control	2022-05-01					77.92	6.46	20.51	50.96	61	85	47	270	671	15800	1316.67	1026	290.667	22.0759			0	0
Home 19	Control	2022-06-01					80.58	5.7	23.92	50.96	60	75	58	315	671	15800	1316.67	1061	255.667	19.4177			0	0
Home 19	Control	2022-07-01					79.67	5.62	23.09	50.96	62	74	37	304	671	15800	1316.67	1049	267.667	20.3291			0	0
Home 19	Control	2022-08-01					81.49	5.85	24.68	50.96	60	77	43	325	671	15800	1316.67	1073	243.667	18.5063			0	0
Home 19	Control	2022-09-01					77.77	6.53	20.28	50.96	71	86	61	267	671	15800	1316.67	1024	292.667	22.2278			0	0
Home 19	Control	2022-10-01					82.56	7.67	23.92	50.96	64	101	74	315	671	15800	1316.67	1087	229.667	17.443			0	0
Home 19	Control	2022-11-01					78.84	8.66	19.22	50.96	71	114	85	253	671	15800	1316.67	1038	278.667	21.1646			0	0
Home 19	Control	2022-12-01					86.51	10.18	25.37	50.96	63	134	112	334	671	15800	1316.67	1139	177.667	13.4937			0	0
Home 19	Control	2023-01-01					84.04	10.91	21.74	51.39	67	145	188	289	683	15950	1329.17	1117	212.167	15.9624			0	0
Home 19	Control	2023-02-01					87.35	10.68	25.28	51.39	64	142	98	336	683	15950	1329.17	1161	168.167	12.652			0	0
Home 19	Control	2023-03-01					80.2	9.48	19.34	51.39	62	126	87	257	683	15950	1329.17	1066	263.167	19.7994			0	0
Home 19	Control	2023-04-01					85.77	8.35	26.03	51.39	61	111	88	346	683	15950	1329.17	1140	189.167	14.232			0	0
Home 19	Control	2023-05-01					84.87	7.45	26.03	51.39	61	99	74	346	683	15950	1329.17	1128	201.167	15.1348			0	0
Home 19	Control	2023-06-01					77.94	6.7	19.86	51.39	62	89	59	264	683	15950	1329.17	1036	293.167	22.0564			0	0
Home 19	Control	2023-07-01					93.89	6.47	36.04	51.39	63	86	47	479	683	15950	1329.17	1248	81.1667	6.10658			0	0
Home 19	Control	2023-08-01					87.65	6.77	29.49	51.39	63	90	33	392	683	15950	1329.17	1165	164.167	12.3511			0	0
Home 19	Control	2023-09-01					80.35	7.52	21.44	51.39	62	100	83	285	683	15950	1329.17	1068	261.167	19.6489			0	0
Home 19	Control	2023-10-01					81.63	8.65	21.59	51.39	63	115	53	287	683	15950	1329.17	1085	244.167	18.3699			0	0
Home 19	Control	2023-11-01					86.22	9.86	24.98	51.39	65	131	93	332	683	15950	1329.17	1146	183.167	13.7806			0	0
Home 19	Control	2023-12-01					88.55	11.74	25.43	51.39	67	156	92	338	683	15950	1329.17	1177	152.167	11.4483			0	0
Home 19	Control	2024-01-01					85.63	17.54	18.39	49.7	64	247	145	259	700	16900	1408.33	1206	202.333	14.3669			0	0
Home 19	Control	2024-02-01					81.87	19.53	12.64	49.7	61	275	164	178	700	16900	1408.33	1153	255.333	18.1302			0	0
Home 19	Control	2024-03-01					92.95	17.33	25.92	49.7	60	244	138	365	700	16900	1408.33	1309	99.3333	7.05325			0	0
Home 19	Control	2024-04-01					81.66	15.2	16.76	49.7	62	214	114	236	700	16900	1408.33	1150	258.333	18.3432			0	0
Home 19	Control	2024-05-01					87.48	13.56	24.21	49.7	67	191	126	341	700	16900	1408.33	1232	176.333	12.5207			0	0
Home 19	Control	2024-06-01					80.73	12.14	18.89	49.7	74	171	75	266	700	16900	1408.33	1137	271.333	19.2663			0	0
Home 19	Control	2024-07-01					92.02	11.79	30.53	49.7	62	166	57	430	700	16900	1408.33	1296	112.333	7.97633			0	0
Home 19	Control	2024-08-01					84.92	12.28	22.93	49.7	65	173	84	323	700	16900	1408.33	1196	212.333	15.0769			0	0
Home 19	Control	2024-09-01					86.98	13.7	23.57	49.7	68	193	113	332	700	16900	1408.33	1225	183.333	13.0178			0	0
Home 19	Control	2024-10-01					89.4	15.76	23.93	49.7	63	222	79	337	700	16900	1408.33	1259	149.333	10.6036			0	0
Home 19	Control	2024-11-01					87.62	18.18	19.74	49.7	69	256	155	278	700	16900	1408.33	1234	174.333	12.3787			0	0
Home 19	Control	2024-12-01					92.52	21.23	21.59	49.7	87	299	201	304	700	16900	1408.33	1303	105.333	7.47929			0	0
Home 20	Renovation	2020-01-01	2022	March	2022-03-01		86.63	18.88	22.79	44.97	80	280	107	338	667	17800	1483.33	1285	198.333	13.3708	-26.0		0	0
Home 20	Renovation	2020-02-01	2022	March	2022-03-01		88.99	17.87	26.16	44.97	91	265	134	388	667	17800	1483.33	1320	163.333	11.0112	-25.0		0	0
Home 20	Renovation	2020-03-01	2022	March	2022-03-01		83.66	16.11	22.58	44.97	76	239	88	335	667	17800	1483.33	1241	242.333	16.3371	-24.0		0	0
Home 20	Renovation	2020-04-01	2022	March	2022-03-01		76.99	14.02	18.0	44.97	69	208	74	267	667	17800	1483.33	1142	341.333	23.0112	-23.0		0	0
Home 20	Renovation	2020-05-01	2022	March	2022-03-01		77.39	12.47	19.96	44.97	78	185	57	296	667	17800	1483.33	1148	335.333	22.6067	-22.0		0	0
Home 20	Renovation	2020-06-01	2022	March	2022-03-01		80.02	11.26	23.8	44.97	78	167	47	353	667	17800	1483.33	1187	296.333	19.9775	-21.0		0	0
Home 20	Renovation	2020-07-01	2022	March	2022-03-01		76.04	10.85	20.22	44.97	68	161	34	300	667	17800	1483.33	1128	355.333	23.9551	-20.0		0	0
Home 20	Renovation	2020-08-01	2022	March	2022-03-01		86.29	11.33	30.0	44.97	74	168	36	445	667	17800	1483.33	1280	203.333	13.7079	-19.0		0	0
Home 20	Renovation	2020-09-01	2022	March	2022-03-01		75.64	12.74	17.93	44.97	73	189	78	266	667	17800	1483.33	1122	361.333	24.3596	-18.0		0	0
Home 20	Renovation	2020-10-01	2022	March	2022-03-01		80.36	14.9	20.49	44.97	67	221	66	304	667	17800	1483.33	1192	291.333	19.6404	-17.0		0	0
Home 20	Renovation	2020-11-01	2022	March	2022-03-01		85.42	16.85	23.6	44.97	69	250	78	350	667	17800	1483.33	1267	216.333	14.5843	-16.0		0	0
Home 20	Renovation	2020-12-01	2022	March	2022-03-01		88.99	19.89	24.13	44.97	78	295	81	358	667	17800	1483.33	1320	163.333	11.0112	-15.0		0	0
Home 20	Renovation	2021-01-01	2022	March	2022-03-01		87.67	21.2	21.2	45.27	92	318	100	318	679	18000	1500	1315	185	12.3333	-14.0		0	0
Home 20	Renovation	2021-02-01	2022	March	2022-03-01		92.8	20.87	26.67	45.27	90	313	82	400	679	18000	1500	1392	108	7.2	-13.0		0	0
Home 20	Renovation	2021-03-01	2022	March	2022-03-01		86.73	18.4	23.07	45.27	77	276	117	346	679	18000	1500	1301	199	13.2667	-12.0		0	0
Home 20	Renovation	2021-04-01	2022	March	2022-03-01		87.4	16.13	26.0	45.27	72	242	84	390	679	18000	1500	1311	189	12.6	-11.0		0	0
Home 20	Renovation	2021-05-01	2022	March	2022-03-01		81.87	14.4	22.2	45.27	73	216	51	333	679	18000	1500	1228	272	18.1333	-10.0		0	0
Home 20	Renovation	2021-06-01	2022	March	2022-03-01		84.8	13.07	26.47	45.27	71	196	69	397	679	18000	1500	1272	228	15.2	-9.0		0	0
Home 20	Renovation	2021-07-01	2022	March	2022-03-01		82.07	12.6	24.2	45.27	72	189	50	363	679	18000	1500	1231	269	17.9333	-8.0		0	0
Home 20	Renovation	2021-08-01	2022	March	2022-03-01		78.0	13.33	19.4	45.27	66	200	43	291	679	18000	1500	1170	330	22	-7.0		0	0
Home 20	Renovation	2021-09-01	2022	March	2022-03-01		80.33	14.87	20.2	45.27	66	223	37	303	679	18000	1500	1205	295	19.6667	-6.0		0	0
Home 20	Renovation	2021-10-01	2022	March	2022-03-01		88.87	17.13	26.47	45.27	67	257	113	397	679	18000	1500	1333	167	11.1333	-5.0		0	0
Home 20	Renovation	2021-11-01	2022	March	2022-03-01		87.87	19.27	23.33	45.27	74	289	71	350	679	18000	1500	1318	182	12.1333	-4.0		0	0
Home 20	Renovation	2021-12-01	2022	March	2022-03-01		96.87	22.73	28.87	45.27	94	341	86	433	679	18000	1500	1453	47	3.13333	-3.0		0	0
Home 20	Renovation	2022-01-01	2022	March	2022-03-01		98.15	20.41	30.98	46.76	111	313	121	475	717	18400	1533.33	1505	28.3333	1.84783	-2.0		0	0
Home 20	Renovation	2022-02-01	2022	March	2022-03-01		90.0	18.39	24.85	46.76	97	282	145	381	717	18400	1533.33	1380	153.333	10	-1.0		0	0
Home 20	Renovation	2022-03-01	2022	March	2022-03-01		83.28	11.41	25.11	46.76	84	175	70	385	717	18400	1533.33	1277	256.333	16.7174	0.0		1	0
Home 20	Renovation	2022-04-01	2022	March	2022-03-01		85.37	9.98	28.63	46.76	73	153	49	439	717	18400	1533.33	1309	224.333	14.6304	1.0		1	0
Home 20	Renovation	2022-05-01	2022	March	2022-03-01		86.02	9.07	30.2	46.76	75	139	41	463	717	18400	1533.33	1319	214.333	13.9783	2.0		1	0
Home 20	Renovation	2022-06-01	2022	March	2022-03-01		81.98	8.02	27.2	46.76	77	123	33	417	717	18400	1533.33	1257	276.333	18.0217	3.0		1	0
Home 20	Renovation	2022-07-01	2022	March	2022-03-01		86.28	7.76	31.76	46.76	90	119	30	487	717	18400	1533.33	1323	210.333	13.7174	4.0		1	0
Home 20	Renovation	2022-08-01	2022	March	2022-03-01		84.13	8.28	29.09	46.76	71	127	31	446	717	18400	1533.33	1290	243.333	15.8696	5.0		1	0
Home 20	Renovation	2022-09-01	2022	March	2022-03-01		83.02	9.26	27.0	46.76	79	142	38	414	717	18400	1533.33	1273	260.333	16.9783	6.0		1	0
Home 20	Renovation	2022-10-01	2022	March	2022-03-01		87.46	10.5	30.2	46.76	81	161	46	463	717	18400	1533.33	1341	192.333	12.5435	7.0		1	0
Home 20	Renovation	2022-11-01	2022	March	2022-03-01		86.22	12.07	27.39	46.76	82	185	51	420	717	18400	1533.33	1322	211.333	13.7826	8.0		1	0
Home 20	Renovation	2022-12-01	2022	March	2022-03-01		87.72	14.15	26.8	46.76	72	217	70	411	717	18400	1533.33	1345	188.333	12.2826	9.0		1	0
Home 20	Renovation	2023-01-01	2022	March	2022-03-01		91.81	8.71	34.71	48.39	87	135	79	538	750	18600	1550	1423	127	8.19355	10.0		1	0
Home 20	Renovation	2023-02-01	2022	March	2022-03-01		72.52	5.81	18.32	48.39	85	90	105	284	750	18600	1550	1124	426	27.4839	11.0		1	0
Home 20	Renovation	2023-03-01	2022	March	2022-03-01		73.29	5.1	19.81	48.39	82	79	74	307	750	18600	1550	1136	414	26.7097	12.0		1	0
Home 20	Renovation	2023-04-01	2022	March	2022-03-01		83.87	4.52	30.97	48.39	81	70	55	480	750	18600	1550	1300	250	16.129	13.0		1	0
Home 20	Renovation	2023-05-01	2022	March	2022-03-01		80.9	4.0	28.52	48.39	79	62	59	442	750	18600	1550	1254	296	19.0968	14.0		1	0
Home 20	Renovation	2023-06-01	2022	March	2022-03-01		76.58	3.61	24.58	48.39	80	56	60	381	750	18600	1550	1187	363	23.4194	15.0		1	0
Home 20	Renovation	2023-07-01	2022	March	2022-03-01		90.84	3.48	38.97	48.39	81	54	45	604	750	18600	1550	1408	142	9.16129	16.0		1	0
Home 20	Renovation	2023-08-01	2022	March	2022-03-01		77.68	3.68	25.61	48.39	83	57	25	397	750	18600	1550	1204	346	22.3226	17.0		1	0
Home 20	Renovation	2023-09-01	2022	March	2022-03-01		79.16	4.13	26.65	48.39	84	64	35	413	750	18600	1550	1227	323	20.8387	18.0		1	0
Home 20	Renovation	2023-10-01	2022	March	2022-03-01		80.19	4.77	27.03	48.39	85	74	68	419	750	18600	1550	1243	307	19.8065	19.0		1	0
Home 20	Renovation	2023-11-01	2022	March	2022-03-01		84.19	5.42	30.39	48.39	86	84	42	471	750	18600	1550	1305	245	15.8065	20.0		1	0
Home 20	Renovation	2023-12-01	2022	March	2022-03-01		87.94	6.32	33.23	48.39	88	98	59	515	750	18600	1550	1363	187	12.0645	21.0		1	0
Home 20	Renovation	2024-01-01	2022	March	2022-03-01		86.85	5.88	33.52	47.45	78	97	124	553	783	19800	1650	1433	217	13.1515	22.0		1	0
Home 20	Renovation	2024-02-01	2022	March	2022-03-01		77.09	5.52	24.12	47.45	69	91	73	398	783	19800	1650	1272	378	22.9091	23.0		1	0
Home 20	Renovation	2024-03-01	2022	March	2022-03-01		78.97	4.97	26.55	47.45	98	82	86	438	783	19800	1650	1303	347	21.0303	24.0		1	0
Home 20	Renovation	2024-04-01	2022	March	2022-03-01		77.15	4.3	25.39	47.45	78	71	46	419	783	19800	1650	1273	377	22.8485	25.0		1	0
Home 20	Renovation	2024-05-01	2022	March	2022-03-01		72.85	3.88	21.52	47.45	81	64	44	355	783	19800	1650	1202	448	27.1515	26.0		1	0
Home 20	Renovation	2024-06-01	2022	March	2022-03-01		76.67	3.45	25.76	47.45	65	57	40	425	783	19800	1650	1265	385	23.3333	27.0		1	0
Home 20	Renovation	2024-07-01	2022	March	2022-03-01		80.06	3.33	29.27	47.45	68	55	22	483	783	19800	1650	1321	329	19.9394	28.0		1	0
Home 20	Renovation	2024-08-01	2022	March	2022-03-01		79.15	3.52	28.18	47.45	87	58	36	465	783	19800	1650	1306	344	20.8485	29.0		1	0
Home 20	Renovation	2024-09-01	2022	March	2022-03-01		86.73	3.94	35.33	47.45	80	65	39	583	783	19800	1650	1431	219	13.2727	30.0		1	0
Home 20	Renovation	2024-10-01	2022	March	2022-03-01		80.0	4.55	28.0	47.45	77	75	53	462	783	19800	1650	1320	330	20	31.0		1	0
Home 20	Renovation	2024-11-01	2022	March	2022-03-01		75.45	5.15	22.85	47.45	85	85	49	377	783	19800	1650	1245	405	24.5455	32.0		1	0
Home 20	Renovation	2024-12-01	2022	March	2022-03-01		80.36	6.06	26.85	47.45	93	100	77	443	783	19800	1650	1326	324	19.6364	33.0		1	0
Home 21	Renovation	2020-01-01	2022	June	2022-06-01		73.12	18.0	18.48	36.64	230	225	364	231	458	15000	1250	914	336	26.88	-29.0		0	0
Home 21	Renovation	2020-02-01	2022	June	2022-06-01		74.48	17.12	20.72	36.64	219	214	306	259	458	15000	1250	931	319	25.52	-28.0		0	0
Home 21	Renovation	2020-03-01	2022	June	2022-06-01		72.48	15.04	20.8	36.64	219	188	281	260	458	15000	1250	906	344	27.52	-27.0		0	0
Home 21	Renovation	2020-04-01	2022	June	2022-06-01		67.92	13.2	18.08	36.64	186	165	246	226	458	15000	1250	849	401	32.08	-26.0		0	0
Home 21	Renovation	2020-05-01	2022	June	2022-06-01		66.56	11.84	18.08	36.64	192	148	185	226	458	15000	1250	832	418	33.44	-25.0		0	0
Home 21	Renovation	2020-06-01	2022	June	2022-06-01		67.2	10.64	19.92	36.64	196	133	147	249	458	15000	1250	840	410	32.8	-24.0		0	0
Home 21	Renovation	2020-07-01	2022	June	2022-06-01		65.6	10.24	18.72	36.64	191	128	116	234	458	15000	1250	820	430	34.4	-23.0		0	0
Home 21	Renovation	2020-08-01	2022	June	2022-06-01		67.44	10.8	20.0	36.64	196	135	128	250	458	15000	1250	843	407	32.56	-22.0		0	0
Home 21	Renovation	2020-09-01	2022	June	2022-06-01		66.96	12.16	18.16	36.64	190	152	144	227	458	15000	1250	837	413	33.04	-21.0		0	0
Home 21	Renovation	2020-10-01	2022	June	2022-06-01		71.6	14.0	20.96	36.64	158	175	326	262	458	15000	1250	895	355	28.4	-20.0		0	0
Home 21	Renovation	2020-11-01	2022	June	2022-06-01		69.52	15.92	16.96	36.64	212	199	234	212	458	15000	1250	869	381	30.48	-19.0		0	0
Home 21	Renovation	2020-12-01	2022	June	2022-06-01		76.24	18.48	21.12	36.64	209	231	323	264	458	15000	1250	953	297	23.76	-18.0		0	0
Home 21	Renovation	2021-01-01	2022	June	2022-06-01		75.12	19.87	17.92	37.32	232	255	307	230	479	15400	1283.33	964	319.333	24.8831	-17.0		0	0
Home 21	Renovation	2021-02-01	2022	June	2022-06-01		74.96	19.71	17.92	37.32	272	253	388	230	479	15400	1283.33	962	321.333	25.039	-16.0		0	0
Home 21	Renovation	2021-03-01	2022	June	2022-06-01		78.31	17.38	23.61	37.32	233	223	262	303	479	15400	1283.33	1005	278.333	21.6883	-15.0		0	0
Home 21	Renovation	2021-04-01	2022	June	2022-06-01		69.66	15.12	17.22	37.32	202	194	277	221	479	15400	1283.33	894	389.333	30.3377	-14.0		0	0
Home 21	Renovation	2021-05-01	2022	June	2022-06-01		69.27	13.56	18.39	37.32	226	174	162	236	479	15400	1283.33	889	394.333	30.7273	-13.0		0	0
Home 21	Renovation	2021-06-01	2022	June	2022-06-01		67.48	12.31	17.84	37.32	211	158	154	229	479	15400	1283.33	866	417.333	32.5195	-12.0		0	0
Home 21	Renovation	2021-07-01	2022	June	2022-06-01		72.0	11.77	22.91	37.32	230	151	113	294	479	15400	1283.33	924	359.333	28	-11.0		0	0
Home 21	Renovation	2021-08-01	2022	June	2022-06-01		70.44	12.55	20.57	37.32	203	161	214	264	479	15400	1283.33	904	379.333	29.5584	-10.0		0	0
Home 21	Renovation	2021-09-01	2022	June	2022-06-01		74.1	14.03	22.75	37.32	204	180	150	292	479	15400	1283.33	951	332.333	25.8961	-9.0		0	0
Home 21	Renovation	2021-10-01	2022	June	2022-06-01		70.13	16.13	16.68	37.32	213	207	252	214	479	15400	1283.33	900	383.333	29.8701	-8.0		0	0
Home 21	Renovation	2021-11-01	2022	June	2022-06-01		73.95	18.23	18.39	37.32	198	234	324	236	479	15400	1283.33	949	334.333	26.0519	-7.0		0	0
Home 21	Renovation	2021-12-01	2022	June	2022-06-01		78.39	21.51	19.56	37.32	226	276	397	251	479	15400	1283.33	1006	277.333	21.6104	-6.0		0	0
Home 21	Renovation	2022-01-01	2022	June	2022-06-01		83.92	27.97	14.52	41.43	293	366	299	190	542	15700	1308.33	1098	210.333	16.0764	-5.0		0	0
Home 21	Renovation	2022-02-01	2022	June	2022-06-01		88.43	29.58	17.43	41.43	242	387	257	228	542	15700	1308.33	1157	151.333	11.5669	-4.0		0	0
Home 21	Renovation	2022-03-01	2022	June	2022-06-01		82.62	26.06	15.13	41.43	228	341	221	198	542	15700	1308.33	1081	227.333	17.3758	-3.0		0	0
Home 21	Renovation	2022-04-01	2022	June	2022-06-01		83.77	23.01	19.34	41.43	232	301	175	253	542	15700	1308.33	1096	212.333	16.2293	-2.0		0	0
Home 21	Renovation	2022-05-01	2022	June	2022-06-01		78.88	20.48	16.97	41.43	245	268	175	222	542	15700	1308.33	1032	276.333	21.121	-1.0		0	0
Home 21	Renovation	2022-06-01	2022	June	2022-06-01		68.64	12.69	14.52	41.43	222	166	119	190	542	15700	1308.33	898	410.333	31.3631	0.0		1	0
Home 21	Renovation	2022-07-01	2022	June	2022-06-01		70.24	12.38	16.43	41.43	238	162	66	215	542	15700	1308.33	919	389.333	29.758	1.0		1	0
Home 21	Renovation	2022-08-01	2022	June	2022-06-01		72.23	13.15	17.66	41.43	244	172	63	231	542	15700	1308.33	945	363.333	27.7707	2.0		1	0
Home 21	Renovation	2022-09-01	2022	June	2022-06-01		77.58	14.68	21.48	41.43	245	192	101	281	542	15700	1308.33	1015	293.333	22.4204	3.0		1	0
Home 21	Renovation	2022-10-01	2022	June	2022-06-01		77.27	16.74	19.11	41.43	248	219	208	250	542	15700	1308.33	1011	297.333	22.7261	4.0		1	0
Home 21	Renovation	2022-11-01	2022	June	2022-06-01		78.27	19.26	17.58	41.43	294	252	140	230	542	15700	1308.33	1024	284.333	21.7325	5.0		1	0
Home 21	Renovation	2022-12-01	2022	June	2022-06-01		84.99	22.7	20.87	41.43	267	297	277	273	542	15700	1308.33	1112	196.333	15.0064	6.0		1	0
Home 21	Renovation	2023-01-01	2022	June	2022-06-01		85.87	26.29	16.76	42.82	271	345	389	220	562	15750	1312.5	1127	185.5	14.1333	7.0		1	0
Home 21	Renovation	2023-02-01	2022	June	2022-06-01		83.12	26.44	13.87	42.82	270	347	195	182	562	15750	1312.5	1091	221.5	16.8762	8.0		1	0
Home 21	Renovation	2023-03-01	2022	June	2022-06-01		83.96	23.31	17.83	42.82	260	306	228	234	562	15750	1312.5	1102	210.5	16.0381	9.0		1	0
Home 21	Renovation	2023-04-01	2022	June	2022-06-01		82.9	20.72	19.35	42.82	259	272	232	254	562	15750	1312.5	1088	224.5	17.1048	10.0		1	0
Home 21	Renovation	2023-05-01	2022	June	2022-06-01		90.44	18.36	29.26	42.82	254	241	109	384	562	15750	1312.5	1187	125.5	9.5619	11.0		1	0
Home 21	Renovation	2023-06-01	2022	June	2022-06-01		77.26	16.61	17.83	42.82	259	218	85	234	562	15750	1312.5	1014	298.5	22.7429	12.0		1	0
Home 21	Renovation	2023-07-01	2022	June	2022-06-01		74.29	15.85	15.62	42.82	261	208	66	205	562	15750	1312.5	975	337.5	25.7143	13.0		1	0
Home 21	Renovation	2023-08-01	2022	June	2022-06-01		80.0	16.99	20.19	42.82	270	223	61	265	562	15750	1312.5	1050	262.5	20	14.0		1	0
Home 21	Renovation	2023-09-01	2022	June	2022-06-01		80.84	18.9	19.12	42.82	266	248	79	251	562	15750	1312.5	1061	251.5	19.1619	15.0		1	0
Home 21	Renovation	2023-10-01	2022	June	2022-06-01		86.7	21.64	22.25	42.82	269	284	81	292	562	15750	1312.5	1138	174.5	13.2952	16.0		1	0
Home 21	Renovation	2023-11-01	2022	June	2022-06-01		87.01	24.84	19.35	42.82	278	326	115	254	562	15750	1312.5	1142	170.5	12.9905	17.0		1	0
Home 21	Renovation	2023-12-01	2022	June	2022-06-01		85.41	29.18	13.41	42.82	285	383	109	176	562	15750	1312.5	1121	191.5	14.5905	18.0		1	0
Home 21	Renovation	2024-01-01	2022	June	2022-06-01		84.24	25.1	16.09	43.04	265	340	274	218	583	16254	1354.5	1141	213.5	15.7623	19.0		1	0
Home 21	Renovation	2024-02-01	2022	June	2022-06-01		86.01	22.52	20.45	43.04	306	305	150	277	583	16254	1354.5	1165	189.5	13.9904	20.0		1	0
Home 21	Renovation	2024-03-01	2022	June	2022-06-01		85.35	19.79	22.52	43.04	278	268	211	305	583	16254	1354.5	1156	198.5	14.6549	21.0		1	0
Home 21	Renovation	2024-04-01	2022	June	2022-06-01		74.79	17.5	14.25	43.04	267	237	186	193	583	16254	1354.5	1013	341.5	25.2123	22.0		1	0
Home 21	Renovation	2024-05-01	2022	June	2022-06-01		74.71	15.43	16.24	43.04	289	209	71	220	583	16254	1354.5	1012	342.5	25.2861	23.0		1	0
Home 21	Renovation	2024-06-01	2022	June	2022-06-01		75.9	13.81	19.05	43.04	292	187	95	258	583	16254	1354.5	1028	326.5	24.1048	24.0		1	0
Home 21	Renovation	2024-07-01	2022	June	2022-06-01		72.43	13.51	15.87	43.04	227	183	101	215	583	16254	1354.5	981	373.5	27.5748	25.0		1	0
Home 21	Renovation	2024-08-01	2022	June	2022-06-01		73.39	14.03	16.32	43.04	304	190	56	221	583	16254	1354.5	994	360.5	26.615	26.0		1	0
Home 21	Renovation	2024-09-01	2022	June	2022-06-01		78.92	15.95	19.93	43.04	259	216	139	270	583	16254	1354.5	1069	285.5	21.0779	27.0		1	0
Home 21	Renovation	2024-10-01	2022	June	2022-06-01		81.28	18.16	20.08	43.04	263	246	119	272	583	16254	1354.5	1101	253.5	18.7154	28.0		1	0
Home 21	Renovation	2024-11-01	2022	June	2022-06-01		84.46	20.67	20.75	43.04	243	280	92	281	583	16254	1354.5	1144	210.5	15.5408	29.0		1	0
Home 21	Renovation	2024-12-01	2022	June	2022-06-01		87.56	24.58	19.93	43.04	297	333	127	270	583	16254	1354.5	1186	168.5	12.44	30.0		1	0
Home 22	Control	2020-01-01					43.43	10.35	15.24	17.84	343	319	79	470	550	37000	3083.33	1339	1744.33	56.573			0	0
Home 22	Control	2020-02-01					45.92	9.76	18.32	17.84	383	301	67	565	550	37000	3083.33	1416	1667.33	54.0757			0	0
Home 22	Control	2020-03-01					43.33	8.56	16.93	17.84	406	264	61	522	550	37000	3083.33	1336	1747.33	56.6703			0	0
Home 22	Control	2020-04-01					43.3	7.49	17.97	17.84	344	231	38	554	550	37000	3083.33	1335	1748.33	56.7027			0	0
Home 22	Control	2020-05-01					43.33	6.71	18.78	17.84	371	207	39	579	550	37000	3083.33	1336	1747.33	56.6703			0	0
Home 22	Control	2020-06-01					42.65	6.0	18.81	17.84	343	185	22	580	550	37000	3083.33	1315	1768.33	57.3514			0	0
Home 22	Control	2020-07-01					42.71	5.9	18.97	17.84	314	182	26	585	550	37000	3083.33	1317	1766.33	57.2865			0	0
Home 22	Control	2020-08-01					42.68	6.16	18.68	17.84	349	190	24	576	550	37000	3083.33	1316	1767.33	57.3189			0	0
Home 22	Control	2020-09-01					47.71	6.94	22.93	17.84	350	214	33	707	550	37000	3083.33	1471	1612.33	52.2919			0	0
Home 22	Control	2020-10-01					43.69	7.95	17.9	17.84	382	245	60	552	550	37000	3083.33	1347	1736.33	56.3135			0	0
Home 22	Control	2020-11-01					48.36	8.95	21.57	17.84	362	276	70	665	550	37000	3083.33	1491	1592.33	51.6432			0	0
Home 22	Control	2020-12-01					49.39	10.67	20.89	17.84	393	329	83	644	550	37000	3083.33	1523	1560.33	50.6054			0	0
Home 22	Control	2021-01-01					46.43	10.09	19.42	16.92	374	328	61	631	550	39000	3250	1509	1741	53.5692			0	0
Home 22	Control	2021-02-01					45.05	9.6	18.52	16.92	406	312	65	602	550	39000	3250	1464	1786	54.9538			0	0
Home 22	Control	2021-03-01					45.6	8.43	20.25	16.92	393	274	72	658	550	39000	3250	1482	1768	54.4			0	0
Home 22	Control	2021-04-01					48.28	7.38	23.97	16.92	371	240	48	779	550	39000	3250	1569	1681	51.7231			0	0
Home 22	Control	2021-05-01					41.42	6.65	17.85	16.92	372	216	58	580	550	39000	3250	1346	1904	58.5846			0	0
Home 22	Control	2021-06-01					41.85	5.91	19.02	16.92	358	192	32	618	550	39000	3250	1360	1890	58.1538			0	0
Home 22	Control	2021-07-01					45.51	5.72	22.86	16.92	368	186	28	743	550	39000	3250	1479	1771	54.4923			0	0
Home 22	Control	2021-08-01					41.75	6.09	18.74	16.92	365	198	28	609	550	39000	3250	1357	1893	58.2462			0	0
Home 22	Control	2021-09-01					36.8	6.74	13.14	16.92	356	219	39	427	550	39000	3250	1196	2054	63.2			0	0
Home 22	Control	2021-10-01					41.6	7.75	16.92	16.92	357	252	47	550	550	39000	3250	1352	1898	58.4			0	0
Home 22	Control	2021-11-01					43.11	8.92	17.26	16.92	383	290	69	561	550	39000	3250	1401	1849	56.8923			0	0
Home 22	Control	2021-12-01					47.05	10.37	19.75	16.92	399	337	91	642	550	39000	3250	1529	1721	52.9538			0	0
Home 22	Control	2022-01-01					44.9	10.01	18.79	16.1	323	342	75	642	550	41000	3416.67	1534	1882.67	55.1024			0	0
Home 22	Control	2022-02-01					52.48	9.57	26.81	16.1	384	327	63	916	550	41000	3416.67	1793	1623.67	47.522			0	0
Home 22	Control	2022-03-01					51.51	8.52	26.9	16.1	434	291	49	919	550	41000	3416.67	1760	1656.67	48.4878			0	0
Home 22	Control	2022-04-01					40.54	7.4	17.03	16.1	378	253	60	582	550	41000	3416.67	1385	2031.67	59.4634			0	0
Home 22	Control	2022-05-01					41.65	6.64	18.91	16.1	356	227	37	646	550	41000	3416.67	1423	1993.67	58.3512			0	0
Home 22	Control	2022-06-01					45.95	5.88	23.97	16.1	336	201	24	819	550	41000	3416.67	1570	1846.67	54.0488			0	0
Home 22	Control	2022-07-01					41.21	5.77	19.35	16.1	319	197	35	661	550	41000	3416.67	1408	2008.67	58.7902			0	0
Home 22	Control	2022-08-01					42.47	6.06	20.31	16.1	377	207	56	694	550	41000	3416.67	1451	1965.67	57.5317			0	0
Home 22	Control	2022-09-01					42.06	6.76	19.2	16.1	375	231	45	656	550	41000	3416.67	1437	1979.67	57.9415			0	0
Home 22	Control	2022-10-01					48.76	7.9	24.76	16.1	347	270	68	846	550	41000	3416.67	1666	1750.67	51.239			0	0
Home 22	Control	2022-11-01					45.83	8.81	20.93	16.1	405	301	71	715	550	41000	3416.67	1566	1850.67	54.1659			0	0
Home 22	Control	2022-12-01					52.95	10.36	26.49	16.1	415	354	87	905	550	41000	3416.67	1809	1607.67	47.0537			0	0
Home 22	Control	2023-01-01					45.46	9.07	21.04	15.35	382	325	98	754	550	43000	3583.33	1629	1954.33	54.5395			0	0
Home 22	Control	2023-02-01					50.46	8.18	26.93	15.35	370	293	65	965	550	43000	3583.33	1808	1775.33	49.5442			0	0
Home 22	Control	2023-03-01					45.38	7.31	22.72	15.35	363	262	64	814	550	43000	3583.33	1626	1957.33	54.6233			0	0
Home 22	Control	2023-04-01					46.33	6.31	24.67	15.35	351	226	52	884	550	43000	3583.33	1660	1923.33	53.6744			0	0
Home 22	Control	2023-05-01					43.51	5.67	22.49	15.35	347	203	33	806	550	43000	3583.33	1559	2024.33	56.493			0	0
Home 22	Control	2023-06-01					43.65	5.11	23.19	15.35	355	183	40	831	550	43000	3583.33	1564	2019.33	56.3535			0	0
Home 22	Control	2023-07-01					44.46	4.97	24.14	15.35	362	178	27	865	550	43000	3583.33	1593	1990.33	55.5442			0	0
Home 22	Control	2023-08-01					46.21	5.19	25.67	15.35	366	186	26	920	550	43000	3583.33	1656	1927.33	53.786			0	0
Home 22	Control	2023-09-01					49.14	5.83	27.96	15.35	365	209	45	1002	550	43000	3583.33	1761	1822.33	50.8558			0	0
Home 22	Control	2023-10-01					42.39	6.78	20.26	15.35	375	243	40	726	550	43000	3583.33	1519	2064.33	57.6093			0	0
Home 22	Control	2023-11-01					42.06	7.56	19.14	15.35	376	271	62	686	550	43000	3583.33	1507	2076.33	57.9442			0	0
Home 22	Control	2023-12-01					57.21	8.99	32.87	15.35	390	322	79	1178	550	43000	3583.33	2050	1533.33	42.7907			0	0
Home 22	Control	2024-01-01					53.52	8.43	30.43	14.67	346	316	98	1141	550	45000	3750	2007	1743	46.48			0	0
Home 22	Control	2024-02-01					47.65	7.92	25.07	14.67	357	297	76	940	550	45000	3750	1787	1963	52.3467			0	0
Home 22	Control	2024-03-01					48.88	7.01	27.2	14.67	374	263	57	1020	550	45000	3750	1833	1917	51.12			0	0
Home 22	Control	2024-04-01					40.88	6.11	20.11	14.67	368	229	56	754	550	45000	3750	1533	2217	59.12			0	0
Home 22	Control	2024-05-01					44.59	5.41	24.51	14.67	310	203	53	919	550	45000	3750	1672	2078	55.4133			0	0
Home 22	Control	2024-06-01					43.2	4.83	23.71	14.67	359	181	34	889	550	45000	3750	1620	2130	56.8			0	0
Home 22	Control	2024-07-01					42.24	4.72	22.85	14.67	342	177	27	857	550	45000	3750	1584	2166	57.76			0	0
Home 22	Control	2024-08-01					38.61	4.93	19.01	14.67	385	185	21	713	550	45000	3750	1448	2302	61.3867			0	0
Home 22	Control	2024-09-01					36.64	5.6	16.37	14.67	381	210	29	614	550	45000	3750	1374	2376	63.36			0	0
Home 22	Control	2024-10-01					48.32	6.48	27.17	14.67	363	243	46	1019	550	45000	3750	1812	1938	51.68			0	0
Home 22	Control	2024-11-01					47.15	7.23	25.25	14.67	405	271	51	947	550	45000	3750	1768	1982	52.8533			0	0
Home 22	Control	2024-12-01					44.21	8.53	21.01	14.67	328	320	72	788	550	45000	3750	1658	2092	55.7867			0	0
Home 23	Control	2020-01-01					74.06	12.28	22.69	39.09	129	131	58	242	417	12800	1066.67	790	276.667	25.9375			0	0
Home 23	Control	2020-02-01					80.34	11.53	29.72	39.09	124	123	58	317	417	12800	1066.67	857	209.667	19.6563			0	0
Home 23	Control	2020-03-01					74.81	10.22	25.5	39.09	126	109	44	272	417	12800	1066.67	798	268.667	25.1875			0	0
Home 23	Control	2020-04-01					72.47	9.09	24.28	39.09	120	97	40	259	417	12800	1066.67	773	293.667	27.5313			0	0
Home 23	Control	2020-05-01					69.66	8.06	22.5	39.09	114	86	30	240	417	12800	1066.67	743	323.667	30.3438			0	0
Home 23	Control	2020-06-01					71.06	7.31	24.66	39.09	128	78	17	263	417	12800	1066.67	758	308.667	28.9375			0	0
Home 23	Control	2020-07-01					78.09	6.94	32.06	39.09	127	74	18	342	417	12800	1066.67	833	233.667	21.9062			0	0
Home 23	Control	2020-08-01					73.5	7.41	27.0	39.09	118	79	23	288	417	12800	1066.67	784	282.667	26.5			0	0
Home 23	Control	2020-09-01					70.12	8.16	22.87	39.09	109	87	24	244	417	12800	1066.67	748	318.667	29.875			0	0
Home 23	Control	2020-10-01					71.53	9.56	22.87	39.09	124	102	43	244	417	12800	1066.67	763	303.667	28.4688			0	0
Home 23	Control	2020-11-01					75.84	10.78	25.97	39.09	130	115	62	277	417	12800	1066.67	809	257.667	24.1562			0	0
Home 23	Control	2020-12-01					80.91	12.66	29.16	39.09	146	135	74	311	417	12800	1066.67	863	203.667	19.0938			0	0
Home 23	Control	2021-01-01					73.1	12.18	21.98	38.93	129	133	56	240	425	13100	1091.67	798	293.667	26.9008			0	0
Home 23	Control	2021-02-01					76.85	11.45	26.47	38.93	140	125	69	289	425	13100	1091.67	839	252.667	23.145			0	0
Home 23	Control	2021-03-01					77.04	10.08	28.03	38.93	127	110	45	306	425	13100	1091.67	841	250.667	22.9618			0	0
Home 23	Control	2021-04-01					77.77	8.89	29.95	38.93	129	97	34	327	425	13100	1091.67	849	242.667	22.229			0	0
Home 23	Control	2021-05-01					69.53	7.88	22.72	38.93	130	86	26	248	425	13100	1091.67	759	332.667	30.4733			0	0
Home 23	Control	2021-06-01					80.7	7.15	34.63	38.93	126	78	22	378	425	13100	1091.67	881	210.667	19.2977			0	0
Home 23	Control	2021-07-01					71.08	6.87	25.28	38.93	115	75	19	276	425	13100	1091.67	776	315.667	28.916			0	0
Home 23	Control	2021-08-01					71.27	7.15	25.19	38.93	121	78	23	275	425	13100	1091.67	778	313.667	28.7328			0	0
Home 23	Control	2021-09-01					71.63	7.97	24.73	38.93	131	87	30	270	425	13100	1091.67	782	309.667	28.3664			0	0
Home 23	Control	2021-10-01					76.21	9.34	27.94	38.93	117	102	38	305	425	13100	1091.67	832	259.667	23.7863			0	0
Home 23	Control	2021-11-01					72.92	10.53	23.45	38.93	138	115	50	256	425	13100	1091.67	796	295.667	27.084			0	0
Home 23	Control	2021-12-01					86.29	12.46	34.9	38.93	126	136	73	381	425	13100	1091.67	942	149.667	13.7099			0	0
Home 23	Control	2022-01-01					75.51	12.22	24.96	38.33	121	138	87	282	433	13555	1129.58	853	276.583	24.4854			0	0
Home 23	Control	2022-02-01					76.84	11.69	26.82	38.33	126	132	55	303	433	13555	1129.58	868	261.583	23.1575			0	0
Home 23	Control	2022-03-01					72.06	10.18	23.55	38.33	124	115	37	266	433	13555	1129.58	814	315.583	27.938			0	0
Home 23	Control	2022-04-01					72.77	9.12	25.32	38.33	124	103	57	286	433	13555	1129.58	822	307.583	27.2298			0	0
Home 23	Control	2022-05-01					67.99	8.06	21.6	38.33	124	91	31	244	433	13555	1129.58	768	361.583	32.0103			0	0
Home 23	Control	2022-06-01					72.86	7.17	27.36	38.33	120	81	30	309	433	13555	1129.58	823	306.583	27.1413			0	0
Home 23	Control	2022-07-01					72.77	6.99	27.44	38.33	113	79	23	310	433	13555	1129.58	822	307.583	27.2298			0	0
Home 23	Control	2022-08-01					68.26	7.44	22.49	38.33	130	84	23	254	433	13555	1129.58	771	358.583	31.7447			0	0
Home 23	Control	2022-09-01					73.57	8.32	26.91	38.33	124	94	44	304	433	13555	1129.58	831	298.583	26.4331			0	0
Home 23	Control	2022-10-01					76.93	9.65	28.95	38.33	134	109	59	327	433	13555	1129.58	869	260.583	23.069			0	0
Home 23	Control	2022-11-01					81.36	10.71	32.31	38.33	113	121	55	365	433	13555	1129.58	919	210.583	18.6426			0	0
Home 23	Control	2022-12-01					77.64	12.75	26.56	38.33	138	144	50	300	433	13555	1129.58	877	252.583	22.3608			0	0
Home 23	Control	2023-01-01					63.8	10.73	17.69	35.38	123	134	60	221	442	14990	1249.17	797	452.167	36.1975			0	0
Home 23	Control	2023-02-01					69.25	9.85	24.02	35.38	117	123	68	300	442	14990	1249.17	865	384.167	30.7538			0	0
Home 23	Control	2023-03-01					78.53	8.57	34.58	35.38	112	107	35	432	442	14990	1249.17	981	268.167	21.4676			0	0
Home 23	Control	2023-04-01					66.52	7.53	23.62	35.38	110	94	42	295	442	14990	1249.17	831	418.167	33.4757			0	0
Home 23	Control	2023-05-01					65.56	6.72	23.46	35.38	109	84	34	293	442	14990	1249.17	819	430.167	34.4363			0	0
Home 23	Control	2023-06-01					72.53	6.08	31.06	35.38	111	76	31	388	442	14990	1249.17	906	343.167	27.4716			0	0
Home 23	Control	2023-07-01					65.32	5.84	24.1	35.38	112	73	25	301	442	14990	1249.17	816	433.167	34.6765			0	0
Home 23	Control	2023-08-01					65.72	6.16	24.18	35.38	114	77	20	302	442	14990	1249.17	821	428.167	34.2762			0	0
Home 23	Control	2023-09-01					64.92	6.96	22.58	35.38	115	87	46	282	442	14990	1249.17	811	438.167	35.0767			0	0
Home 23	Control	2023-10-01					69.17	7.93	25.86	35.38	116	99	42	323	442	14990	1249.17	864	385.167	30.8339			0	0
Home 23	Control	2023-11-01					69.89	9.05	25.46	35.38	119	113	54	318	442	14990	1249.17	873	376.167	30.1134			0	0
Home 23	Control	2023-12-01					74.45	10.73	28.34	35.38	122	134	54	354	442	14990	1249.17	930	319.167	25.5504			0	0
Home 23	Control	2024-01-01					68.58	11.16	22.78	34.64	117	145	53	296	450	15590	1299.17	891	408.167	31.4176			0	0
Home 23	Control	2024-02-01					62.42	10.93	16.86	34.64	133	142	42	219	450	15590	1299.17	811	488.167	37.5754			0	0
Home 23	Control	2024-03-01					69.89	9.62	25.63	34.64	146	125	42	333	450	15590	1299.17	908	391.167	30.109			0	0
Home 23	Control	2024-04-01					60.89	8.47	17.78	34.64	104	110	55	231	450	15590	1299.17	791	508.167	39.1148			0	0
Home 23	Control	2024-05-01					64.12	7.47	22.01	34.64	126	97	21	286	450	15590	1299.17	833	466.167	35.882			0	0
Home 23	Control	2024-06-01					70.51	6.77	29.1	34.64	107	88	15	378	450	15590	1299.17	916	383.167	29.4933			0	0
Home 23	Control	2024-07-01					67.35	6.54	26.17	34.64	95	85	30	340	450	15590	1299.17	875	424.167	32.6491			0	0
Home 23	Control	2024-08-01					72.51	6.93	30.94	34.64	127	90	22	402	450	15590	1299.17	942	357.167	27.492			0	0
Home 23	Control	2024-09-01					63.66	7.7	21.32	34.64	142	100	25	277	450	15590	1299.17	827	472.167	36.3438			0	0
Home 23	Control	2024-10-01					64.35	8.85	20.86	34.64	149	115	48	271	450	15590	1299.17	836	463.167	35.6511			0	0
Home 23	Control	2024-11-01					73.43	10.08	28.71	34.64	128	131	39	373	450	15590	1299.17	954	345.167	26.5683			0	0
Home 23	Control	2024-12-01					72.28	11.85	25.79	34.64	111	154	93	335	450	15590	1299.17	939	360.167	27.7229			0	0
Home 24	Renovation	2020-01-01	2022	April	2022-04-01		79.81	6.76	31.43	41.62	78	71	59	330	437	12600	1050	838	212	20.1905	-27.0		0	0
Home 24	Renovation	2020-02-01	2022	April	2022-04-01		93.14	6.38	45.14	41.62	78	67	44	474	437	12600	1050	978	72	6.85714	-26.0		0	0
Home 24	Renovation	2020-03-01	2022	April	2022-04-01		80.95	5.62	33.71	41.62	85	59	59	354	437	12600	1050	850	200	19.0476	-25.0		0	0
Home 24	Renovation	2020-04-01	2022	April	2022-04-01		85.33	4.95	38.76	41.62	74	52	29	407	437	12600	1050	896	154	14.6667	-24.0		0	0
Home 24	Renovation	2020-05-01	2022	April	2022-04-01		93.71	4.38	47.71	41.62	62	46	31	501	437	12600	1050	984	66	6.28571	-23.0		0	0
Home 24	Renovation	2020-06-01	2022	April	2022-04-01		91.9	4.0	46.29	41.62	76	42	23	486	437	12600	1050	965	85	8.09524	-22.0		0	0
Home 24	Renovation	2020-07-01	2022	April	2022-04-01		91.14	3.9	45.62	41.62	73	41	25	479	437	12600	1050	957	93	8.85714	-21.0		0	0
Home 24	Renovation	2020-08-01	2022	April	2022-04-01		84.0	4.0	38.38	41.62	79	42	28	403	437	12600	1050	882	168	16	-20.0		0	0
Home 24	Renovation	2020-09-01	2022	April	2022-04-01		78.1	4.48	32.0	41.62	76	47	27	336	437	12600	1050	820	230	21.9048	-19.0		0	0
Home 24	Renovation	2020-10-01	2022	April	2022-04-01		80.0	5.24	33.14	41.62	81	55	30	348	437	12600	1050	840	210	20	-18.0		0	0
Home 24	Renovation	2020-11-01	2022	April	2022-04-01		84.19	5.9	36.67	41.62	78	62	46	385	437	12600	1050	884	166	15.8095	-17.0		0	0
Home 24	Renovation	2020-12-01	2022	April	2022-04-01		86.48	7.05	37.81	41.62	82	74	48	397	437	12600	1050	908	142	13.5238	-16.0		0	0
Home 24	Renovation	2021-01-01	2022	April	2022-04-01		84.0	7.6	34.72	41.68	88	83	74	379	455	13100	1091.67	917	174.667	16	-15.0		0	0
Home 24	Renovation	2021-02-01	2022	April	2022-04-01		85.92	7.51	36.73	41.68	97	82	48	401	455	13100	1091.67	938	153.667	14.0763	-14.0		0	0
Home 24	Renovation	2021-03-01	2022	April	2022-04-01		84.18	6.78	35.73	41.68	92	74	38	390	455	13100	1091.67	919	172.667	15.8168	-13.0		0	0
Home 24	Renovation	2021-04-01	2022	April	2022-04-01		83.82	5.86	36.27	41.68	93	64	33	396	455	13100	1091.67	915	176.667	16.1832	-12.0		0	0
Home 24	Renovation	2021-05-01	2022	April	2022-04-01		86.75	5.22	39.85	41.68	80	57	21	435	455	13100	1091.67	947	144.667	13.2519	-11.0		0	0
Home 24	Renovation	2021-06-01	2022	April	2022-04-01		81.34	4.67	34.99	41.68	97	51	17	382	455	13100	1091.67	888	203.667	18.6565	-10.0		0	0
Home 24	Renovation	2021-07-01	2022	April	2022-04-01		89.5	4.49	43.33	41.68	89	49	23	473	455	13100	1091.67	977	114.667	10.5038	-9.0		0	0
Home 24	Renovation	2021-08-01	2022	April	2022-04-01		91.05	4.85	44.52	41.68	94	53	18	486	455	13100	1091.67	994	97.6667	8.94656	-8.0		0	0
Home 24	Renovation	2021-09-01	2022	April	2022-04-01		84.37	5.4	37.28	41.68	90	59	22	407	455	13100	1091.67	921	170.667	15.6336	-7.0		0	0
Home 24	Renovation	2021-10-01	2022	April	2022-04-01		86.93	6.23	39.02	41.68	96	68	37	426	455	13100	1091.67	949	142.667	13.0687	-6.0		0	0
Home 24	Renovation	2021-11-01	2022	April	2022-04-01		96.0	7.05	47.27	41.68	78	77	51	516	455	13100	1091.67	1048	43.6667	4	-5.0		0	0
Home 24	Renovation	2021-12-01	2022	April	2022-04-01		96.64	8.24	46.72	41.68	96	90	59	510	455	13100	1091.67	1055	36.6667	3.35878	-4.0		0	0
Home 24	Renovation	2022-01-01	2022	April	2022-04-01		109.13	10.78	53.44	44.91	114	120	57	595	500	13360	1113.33	1215	-101.667	-9.13174	-3.0		0	0
Home 24	Renovation	2022-02-01	2022	April	2022-04-01		104.73	11.5	48.32	44.91	117	128	37	538	500	13360	1113.33	1166	-52.6667	-4.73054	-2.0		0	0
Home 24	Renovation	2022-03-01	2022	April	2022-04-01		105.81	10.06	50.84	44.91	129	112	28	566	500	13360	1113.33	1178	-64.6667	-5.80838	-1.0		0	0
Home 24	Renovation	2022-04-01	2022	April	2022-04-01		93.05	6.2	41.95	44.91	100	69	27	467	500	13360	1113.33	1036	77.3333	6.94611	0.0		1	0
Home 24	Renovation	2022-05-01	2022	April	2022-04-01		96.2	5.66	45.63	44.91	120	63	16	508	500	13360	1113.33	1071	42.3333	3.8024	1.0		1	0
Home 24	Renovation	2022-06-01	2022	April	2022-04-01		91.8	5.03	41.86	44.91	115	56	13	466	500	13360	1113.33	1022	91.3333	8.20359	2.0		1	0
Home 24	Renovation	2022-07-01	2022	April	2022-04-01		96.47	4.85	46.71	44.91	123	54	15	520	500	13360	1113.33	1074	39.3333	3.53293	3.0		1	0
Home 24	Renovation	2022-08-01	2022	April	2022-04-01		99.43	5.12	49.4	44.91	95	57	14	550	500	13360	1113.33	1107	6.33333	0.568862	4.0		1	0
Home 24	Renovation	2022-09-01	2022	April	2022-04-01		97.72	5.66	47.16	44.91	120	63	18	525	500	13360	1113.33	1088	25.3333	2.27545	5.0		1	0
Home 24	Renovation	2022-10-01	2022	April	2022-04-01		89.37	6.56	37.9	44.91	120	73	32	422	500	13360	1113.33	995	118.333	10.6287	6.0		1	0
Home 24	Renovation	2022-11-01	2022	April	2022-04-01		94.04	7.46	41.68	44.91	119	83	23	464	500	13360	1113.33	1047	66.3333	5.95808	7.0		1	0
Home 24	Renovation	2022-12-01	2022	April	2022-04-01		96.65	8.8	42.93	44.91	139	98	40	478	500	13360	1113.33	1076	37.3333	3.35329	8.0		1	0
Home 24	Renovation	2023-01-01	2022	April	2022-04-01		89.79	6.4	40.01	43.37	121	80	22	500	542	14995	1249.58	1122	127.583	10.2101	9.0		1	0
Home 24	Renovation	2023-02-01	2022	April	2022-04-01		84.11	5.44	35.29	43.37	119	68	12	441	542	14995	1249.58	1051	198.583	15.892	10.0		1	0
Home 24	Renovation	2023-03-01	2022	April	2022-04-01		88.59	4.72	40.49	43.37	114	59	13	506	542	14995	1249.58	1107	142.583	11.4105	11.0		1	0
Home 24	Renovation	2023-04-01	2022	April	2022-04-01		74.1	4.16	26.57	43.37	112	52	9	332	542	14995	1249.58	926	323.583	25.8953	12.0		1	0
Home 24	Renovation	2023-05-01	2022	April	2022-04-01		87.23	3.76	40.09	43.37	111	47	6	501	542	14995	1249.58	1090	159.583	12.7709	13.0		1	0
Home 24	Renovation	2023-06-01	2022	April	2022-04-01		79.55	3.36	32.81	43.37	113	42	5	410	542	14995	1249.58	994	255.583	20.4535	14.0		1	0
Home 24	Renovation	2023-07-01	2022	April	2022-04-01		91.79	3.2	45.22	43.37	114	40	3	565	542	14995	1249.58	1147	102.583	8.2094	15.0		1	0
Home 24	Renovation	2023-08-01	2022	April	2022-04-01		92.51	3.44	45.7	43.37	117	43	3	571	542	14995	1249.58	1156	93.5833	7.48916	16.0		1	0
Home 24	Renovation	2023-09-01	2022	April	2022-04-01		90.67	3.76	43.53	43.37	115	47	3	544	542	14995	1249.58	1133	116.583	9.32978	17.0		1	0
Home 24	Renovation	2023-10-01	2022	April	2022-04-01		93.95	4.4	46.18	43.37	119	55	3	577	542	14995	1249.58	1174	75.5833	6.04868	18.0		1	0
Home 24	Renovation	2023-11-01	2022	April	2022-04-01		93.95	5.04	45.54	43.37	121	63	8	569	542	14995	1249.58	1174	75.5833	6.04868	19.0		1	0
Home 24	Renovation	2023-12-01	2022	April	2022-04-01		88.03	5.92	38.73	43.37	124	74	5	484	542	14995	1249.58	1100	149.583	11.9707	20.0		1	0
Home 24	Renovation	2024-01-01	2022	April	2022-04-01		81.38	5.53	30.76	45.09	98	71	11	395	579	15410	1284.17	1045	239.167	18.6243	21.0		1	0
Home 24	Renovation	2024-02-01	2022	April	2022-04-01		95.63	5.14	45.4	45.09	121	66	9	583	579	15410	1284.17	1228	56.1667	4.37378	22.0		1	0
Home 24	Renovation	2024-03-01	2022	April	2022-04-01		92.74	4.52	43.14	45.09	130	58	9	554	579	15410	1284.17	1191	93.1667	7.25503	23.0		1	0
Home 24	Renovation	2024-04-01	2022	April	2022-04-01		76.08	3.97	27.02	45.09	95	51	8	347	579	15410	1284.17	977	307.167	23.9195	24.0		1	0
Home 24	Renovation	2024-05-01	2022	April	2022-04-01		79.12	3.5	30.53	45.09	117	45	6	392	579	15410	1284.17	1016	268.167	20.8825	25.0		1	0
Home 24	Renovation	2024-06-01	2022	April	2022-04-01		81.14	3.19	32.86	45.09	111	41	3	422	579	15410	1284.17	1042	242.167	18.8579	26.0		1	0
Home 24	Renovation	2024-07-01	2022	April	2022-04-01		89.55	3.11	41.35	45.09	86	40	4	531	579	15410	1284.17	1150	134.167	10.4478	27.0		1	0
Home 24	Renovation	2024-08-01	2022	April	2022-04-01		80.91	3.19	32.63	45.09	120	41	4	419	579	15410	1284.17	1039	245.167	19.0915	28.0		1	0
Home 24	Renovation	2024-09-01	2022	April	2022-04-01		95.39	3.58	46.72	45.09	100	46	4	600	579	15410	1284.17	1225	59.1667	4.6074	29.0		1	0
Home 24	Renovation	2024-10-01	2022	April	2022-04-01		86.83	4.21	37.53	45.09	130	54	7	482	579	15410	1284.17	1115	169.167	13.1733	30.0		1	0
Home 24	Renovation	2024-11-01	2022	April	2022-04-01		104.66	4.75	54.82	45.09	120	61	6	704	579	15410	1284.17	1344	-59.8333	-4.65931	31.0		1	0
Home 24	Renovation	2024-12-01	2022	April	2022-04-01		98.97	5.53	48.36	45.09	119	71	7	621	579	15410	1284.17	1271	13.1667	1.02531	32.0		1	0
Home 25	Control	2020-01-01					62.24	10.0	17.6	34.64	158	125	67	220	433	15000	1250	778	472	37.76			0	0
Home 25	Control	2020-02-01					64.0	9.36	20.0	34.64	156	117	66	250	433	15000	1250	800	450	36			0	0
Home 25	Control	2020-03-01					63.84	8.4	20.8	34.64	130	105	47	260	433	15000	1250	798	452	36.16			0	0
Home 25	Control	2020-04-01					58.64	7.28	16.72	34.64	126	91	29	209	433	15000	1250	733	517	41.36			0	0
Home 25	Control	2020-05-01					59.84	6.48	18.72	34.64	137	81	32	234	433	15000	1250	748	502	40.16			0	0
Home 25	Control	2020-06-01					62.88	5.84	22.4	34.64	127	73	21	280	433	15000	1250	786	464	37.12			0	0
Home 25	Control	2020-07-01					64.32	5.68	24.0	34.64	150	71	20	300	433	15000	1250	804	446	35.68			0	0
Home 25	Control	2020-08-01					67.68	6.0	27.04	34.64	130	75	26	338	433	15000	1250	846	404	32.32			0	0
Home 25	Control	2020-09-01					63.44	6.56	22.24	34.64	142	82	37	278	433	15000	1250	793	457	36.56			0	0
Home 25	Control	2020-10-01					61.92	7.76	19.52	34.64	149	97	39	244	433	15000	1250	774	476	38.08			0	0
Home 25	Control	2020-11-01					62.48	8.72	19.12	34.64	171	109	50	239	433	15000	1250	781	469	37.52			0	0
Home 25	Control	2020-12-01					64.8	10.4	19.76	34.64	163	130	83	247	433	15000	1250	810	440	35.2			0	0
Home 25	Control	2021-01-01					64.92	9.69	21.54	33.69	144	126	63	280	438	15600	1300	844	456	35.0769			0	0
Home 25	Control	2021-02-01					58.69	8.85	16.15	33.69	154	115	88	210	438	15600	1300	763	537	41.3077			0	0
Home 25	Control	2021-03-01					59.31	7.92	17.69	33.69	154	103	51	230	438	15600	1300	771	529	40.6923			0	0
Home 25	Control	2021-04-01					59.85	7.0	19.15	33.69	146	91	28	249	438	15600	1300	778	522	40.1538			0	0
Home 25	Control	2021-05-01					62.92	6.15	23.08	33.69	132	80	35	300	438	15600	1300	818	482	37.0769			0	0
Home 25	Control	2021-06-01					60.62	5.62	21.31	33.69	155	73	26	277	438	15600	1300	788	512	39.3846			0	0
Home 25	Control	2021-07-01					58.77	5.38	19.69	33.69	128	70	28	256	438	15600	1300	764	536	41.2308			0	0
Home 25	Control	2021-08-01					61.0	5.69	21.62	33.69	145	74	28	281	438	15600	1300	793	507	39			0	0
Home 25	Control	2021-09-01					65.0	6.31	25.0	33.69	135	82	31	325	438	15600	1300	845	455	35			0	0
Home 25	Control	2021-10-01					59.92	7.38	18.85	33.69	149	96	32	245	438	15600	1300	779	521	40.0769			0	0
Home 25	Control	2021-11-01					64.77	8.31	22.77	33.69	147	108	47	296	438	15600	1300	842	458	35.2308			0	0
Home 25	Control	2021-12-01					66.46	9.77	23.0	33.69	142	127	53	299	438	15600	1300	864	436	33.5385			0	0
Home 25	Control	2022-01-01					66.76	9.42	23.47	33.87	131	124	55	309	446	15800	1316.67	879	437.667	33.2405			0	0
Home 25	Control	2022-02-01					63.11	8.66	20.58	33.87	158	114	61	271	446	15800	1316.67	831	485.667	36.8861			0	0
Home 25	Control	2022-03-01					60.61	7.75	18.99	33.87	144	102	62	250	446	15800	1316.67	798	518.667	39.3924			0	0
Home 25	Control	2022-04-01					58.94	6.84	18.23	33.87	143	90	41	240	446	15800	1316.67	776	540.667	41.0633			0	0
Home 25	Control	2022-05-01					60.61	6.15	20.58	33.87	157	81	25	271	446	15800	1316.67	798	518.667	39.3924			0	0
Home 25	Control	2022-06-01					57.95	5.47	18.61	33.87	144	72	27	245	446	15800	1316.67	763	553.667	42.0506			0	0
Home 25	Control	2022-07-01					57.04	5.24	17.92	33.87	116	69	27	236	446	15800	1316.67	751	565.667	42.962			0	0
Home 25	Control	2022-08-01					67.52	5.54	28.1	33.87	130	73	22	370	446	15800	1316.67	889	427.667	32.481			0	0
Home 25	Control	2022-09-01					59.01	6.3	18.84	33.87	128	83	31	248	446	15800	1316.67	777	539.667	40.9873			0	0
Home 25	Control	2022-10-01					60.76	7.22	19.67	33.87	139	95	41	259	446	15800	1316.67	800	516.667	39.2405			0	0
Home 25	Control	2022-11-01					63.34	8.13	21.34	33.87	147	107	43	281	446	15800	1316.67	834	482.667	36.6582			0	0
Home 25	Control	2022-12-01					71.54	9.49	28.18	33.87	180	125	69	371	446	15800	1316.67	942	374.667	28.4557			0	0
Home 25	Control	2023-01-01					67.26	10.08	23.32	33.86	155	134	68	310	450	15950	1329.17	894	435.167	32.7398			0	0
Home 25	Control	2023-02-01					70.27	9.86	26.56	33.86	155	131	73	353	450	15950	1329.17	934	395.167	29.7304			0	0
Home 25	Control	2023-03-01					64.33	8.73	21.74	33.86	150	116	44	289	450	15950	1329.17	855	474.167	35.674			0	0
Home 25	Control	2023-04-01					62.75	7.67	21.22	33.86	147	102	40	282	450	15950	1329.17	834	495.167	37.2539			0	0
Home 25	Control	2023-05-01					63.12	6.92	22.34	33.86	147	92	45	297	450	15950	1329.17	839	490.167	36.8777			0	0
Home 25	Control	2023-06-01					66.88	6.17	26.86	33.86	148	82	27	357	450	15950	1329.17	889	440.167	33.116			0	0
Home 25	Control	2023-07-01					58.23	5.87	18.51	33.86	149	78	40	246	450	15950	1329.17	774	555.167	41.768			0	0
Home 25	Control	2023-08-01					59.74	6.32	19.56	33.86	154	84	26	260	450	15950	1329.17	794	535.167	40.2633			0	0
Home 25	Control	2023-09-01					66.28	7.0	25.43	33.86	151	93	39	338	450	15950	1329.17	881	448.167	33.7179			0	0
Home 25	Control	2023-10-01					69.37	8.13	27.39	33.86	155	108	61	364	450	15950	1329.17	922	407.167	30.6332			0	0
Home 25	Control	2023-11-01					59.66	9.25	16.55	33.86	159	123	41	220	450	15950	1329.17	793	536.167	40.3386			0	0
Home 25	Control	2023-12-01					66.06	10.91	21.29	33.86	163	145	48	283	450	15950	1329.17	878	451.167	33.9436			0	0
Home 25	Control	2024-01-01					64.32	10.32	20.49	33.51	174	141	38	280	458	16400	1366.67	879	487.667	35.6829			0	0
Home 25	Control	2024-02-01					64.1	9.66	20.93	33.51	162	132	71	286	458	16400	1366.67	876	490.667	35.9024			0	0
Home 25	Control	2024-03-01					65.85	8.63	23.71	33.51	163	118	38	324	458	16400	1366.67	900	466.667	34.1463			0	0
Home 25	Control	2024-04-01					65.78	7.39	24.88	33.51	156	101	66	340	458	16400	1366.67	899	467.667	34.2195			0	0
Home 25	Control	2024-05-01					58.39	6.73	18.15	33.51	124	92	25	248	458	16400	1366.67	798	568.667	41.6098			0	0
Home 25	Control	2024-06-01					63.37	6.0	23.85	33.51	126	82	24	326	458	16400	1366.67	866	500.667	36.6341			0	0
Home 25	Control	2024-07-01					56.12	5.78	16.83	33.51	152	79	30	230	458	16400	1366.67	767	599.667	43.878			0	0
Home 25	Control	2024-08-01					63.51	6.15	23.85	33.51	147	84	38	326	458	16400	1366.67	868	498.667	36.4878			0	0
Home 25	Control	2024-09-01					59.27	6.88	18.88	33.51	155	94	49	258	458	16400	1366.67	810	556.667	40.7317			0	0
Home 25	Control	2024-10-01					62.34	7.9	20.93	33.51	181	108	50	286	458	16400	1366.67	852	514.667	37.6585			0	0
Home 25	Control	2024-11-01					64.9	8.93	22.46	33.51	147	122	59	307	458	16400	1366.67	887	479.667	35.0976			0	0
Home 25	Control	2024-12-01					68.93	10.68	24.73	33.51	156	146	68	338	458	16400	1366.67	942	424.667	31.0732			0	0
Home 26	Control	2020-01-01					61.53	9.97	22.59	28.97	336	241	185	546	700	29000	2416.67	1487	929.667	38.469			0	0
Home 26	Control	2020-02-01					63.02	9.27	24.79	28.97	297	224	133	599	700	29000	2416.67	1523	893.667	36.9793			0	0
Home 26	Control	2020-03-01					59.71	8.32	22.43	28.97	298	201	108	542	700	29000	2416.67	1443	973.667	40.2897			0	0
Home 26	Control	2020-04-01					60.91	7.2	24.74	28.97	337	174	100	598	700	29000	2416.67	1472	944.667	39.0897			0	0
Home 26	Control	2020-05-01					59.88	6.5	24.41	28.97	303	157	81	590	700	29000	2416.67	1447	969.667	40.1241			0	0
Home 26	Control	2020-06-01					59.71	5.75	24.99	28.97	294	139	59	604	700	29000	2416.67	1443	973.667	40.2897			0	0
Home 26	Control	2020-07-01					60.37	5.63	25.78	28.97	307	136	68	623	700	29000	2416.67	1459	957.667	39.6276			0	0
Home 26	Control	2020-08-01					57.85	5.88	23.01	28.97	277	142	77	556	700	29000	2416.67	1398	1018.67	42.1517			0	0
Home 26	Control	2020-09-01					61.74	6.58	26.19	28.97	308	159	84	633	700	29000	2416.67	1492	924.667	38.2621			0	0
Home 26	Control	2020-10-01					64.72	7.61	28.14	28.97	310	184	139	680	700	29000	2416.67	1564	852.667	35.2828			0	0
Home 26	Control	2020-11-01					60.7	8.61	23.13	28.97	335	208	105	559	700	29000	2416.67	1467	949.667	39.2966			0	0
Home 26	Control	2020-12-01					58.63	10.3	19.37	28.97	298	249	162	468	700	29000	2416.67	1417	999.667	41.3655			0	0
Home 26	Control	2021-01-01					65.44	9.7	27.46	28.29	304	244	149	691	712	30200	2516.67	1647	869.667	34.5563			0	0
Home 26	Control	2021-02-01					62.94	9.18	25.47	28.29	307	231	112	641	712	30200	2516.67	1584	932.667	37.0596			0	0
Home 26	Control	2021-03-01					63.81	8.07	27.46	28.29	305	203	130	691	712	30200	2516.67	1606	910.667	36.1854			0	0
Home 26	Control	2021-04-01					58.85	7.03	23.52	28.29	318	177	103	592	712	30200	2516.67	1481	1035.67	41.1523			0	0
Home 26	Control	2021-05-01					59.68	6.4	24.99	28.29	283	161	116	629	712	30200	2516.67	1502	1014.67	40.3179			0	0
Home 26	Control	2021-06-01					60.6	5.72	26.58	28.29	350	144	77	669	712	30200	2516.67	1525	991.667	39.404			0	0
Home 26	Control	2021-07-01					60.0	5.56	26.15	28.29	305	140	52	658	712	30200	2516.67	1510	1006.67	40			0	0
Home 26	Control	2021-08-01					60.6	5.8	26.5	28.29	286	146	96	667	712	30200	2516.67	1525	991.667	39.404			0	0
Home 26	Control	2021-09-01					59.68	6.48	24.91	28.29	313	163	109	627	712	30200	2516.67	1502	1014.67	40.3179			0	0
Home 26	Control	2021-10-01					61.47	7.43	25.75	28.29	322	187	124	648	712	30200	2516.67	1547	969.667	38.5298			0	0
Home 26	Control	2021-11-01					65.52	8.54	28.69	28.29	309	215	133	722	712	30200	2516.67	1649	867.667	34.4768			0	0
Home 26	Control	2021-12-01					68.78	10.09	30.4	28.29	348	254	149	765	712	30200	2516.67	1731	785.667	31.2185			0	0
Home 26	Control	2022-01-01					65.92	10.88	27.31	27.73	284	283	147	710	721	31200	2600	1714	886	34.0769			0	0
Home 26	Control	2022-02-01					71.12	10.77	32.62	27.73	309	280	168	848	721	31200	2600	1849	751	28.8846			0	0
Home 26	Control	2022-03-01					67.0	9.54	29.73	27.73	294	248	163	773	721	31200	2600	1742	858	33			0	0
Home 26	Control	2022-04-01					69.96	8.31	33.92	27.73	287	216	124	882	721	31200	2600	1819	781	30.0385			0	0
Home 26	Control	2022-05-01					73.38	7.5	38.15	27.73	284	195	70	992	721	31200	2600	1908	692	26.6154			0	0
Home 26	Control	2022-06-01					70.96	6.73	36.5	27.73	275	175	50	949	721	31200	2600	1845	755	29.0385			0	0
Home 26	Control	2022-07-01					65.08	6.46	30.88	27.73	310	168	57	803	721	31200	2600	1692	908	34.9231			0	0
Home 26	Control	2022-08-01					68.38	6.88	33.77	27.73	269	179	44	878	721	31200	2600	1778	822	31.6154			0	0
Home 26	Control	2022-09-01					70.0	7.62	34.65	27.73	271	198	82	901	721	31200	2600	1820	780	30			0	0
Home 26	Control	2022-10-01					71.23	8.88	34.62	27.73	289	231	97	900	721	31200	2600	1852	748	28.7692			0	0
Home 26	Control	2022-11-01					67.62	10.04	29.85	27.73	322	261	112	776	721	31200	2600	1758	842	32.3846			0	0
Home 26	Control	2022-12-01					77.58	11.85	38.0	27.73	307	308	116	988	721	31200	2600	2017	583	22.4231			0	0
Home 26	Control	2023-01-01					74.52	10.91	36.43	27.19	297	294	172	982	733	32350	2695.83	2009	686.833	25.4776			0	0
Home 26	Control	2023-02-01					66.36	10.2	28.97	27.19	288	275	120	781	733	32350	2695.83	1789	906.833	33.6383			0	0
Home 26	Control	2023-03-01					73.67	9.01	37.47	27.19	279	243	86	1010	733	32350	2695.83	1986	709.833	26.3308			0	0
Home 26	Control	2023-04-01					67.44	7.86	32.38	27.19	272	212	45	873	733	32350	2695.83	1818	877.833	32.5626			0	0
Home 26	Control	2023-05-01					64.66	7.01	30.45	27.19	268	189	75	821	733	32350	2695.83	1743	952.833	35.3447			0	0
Home 26	Control	2023-06-01					66.84	6.34	33.31	27.19	274	171	94	898	733	32350	2695.83	1802	893.833	33.1561			0	0
Home 26	Control	2023-07-01					63.8	6.16	30.45	27.19	280	166	82	821	733	32350	2695.83	1720	975.833	36.1978			0	0
Home 26	Control	2023-08-01					65.4	6.45	31.75	27.19	284	174	53	856	733	32350	2695.83	1763	932.833	34.6028			0	0
Home 26	Control	2023-09-01					81.16	7.23	46.74	27.19	282	195	66	1260	733	32350	2695.83	2188	507.833	18.8377			0	0
Home 26	Control	2023-10-01					63.54	8.27	28.08	27.19	285	223	110	757	733	32350	2695.83	1713	982.833	36.4575			0	0
Home 26	Control	2023-11-01					77.71	9.35	41.17	27.19	290	252	93	1110	733	32350	2695.83	2095	600.833	22.2875			0	0
Home 26	Control	2023-12-01					80.27	11.09	41.99	27.19	300	299	164	1132	733	32350	2695.83	2164	531.833	19.728			0	0
Home 26	Control	2024-01-01					75.35	10.04	39.06	26.25	285	287	158	1116	750	34290	2857.5	2153	704.5	24.6544			0	0
Home 26	Control	2024-02-01					77.94	9.13	42.55	26.25	270	261	157	1216	750	34290	2857.5	2227	630.5	22.0647			0	0
Home 26	Control	2024-03-01					63.87	8.12	29.5	26.25	270	232	95	843	750	34290	2857.5	1825	1032.5	36.133			0	0
Home 26	Control	2024-04-01					65.41	7.1	32.06	26.25	301	203	75	916	750	34290	2857.5	1869	988.5	34.5932			0	0
Home 26	Control	2024-05-01					63.87	6.37	31.25	26.25	267	182	52	893	750	34290	2857.5	1825	1032.5	36.133			0	0
Home 26	Control	2024-06-01					57.25	5.67	25.34	26.25	270	162	41	724	750	34290	2857.5	1636	1221.5	42.7472			0	0
Home 26	Control	2024-07-01					60.61	5.53	28.84	26.25	247	158	44	824	750	34290	2857.5	1732	1125.5	39.3876			0	0
Home 26	Control	2024-08-01					83.43	5.84	51.34	26.25	290	167	56	1467	750	34290	2857.5	2384	473.5	16.5704			0	0
Home 26	Control	2024-09-01					66.11	6.51	33.35	26.25	310	186	82	953	750	34290	2857.5	1889	968.5	33.8933			0	0
Home 26	Control	2024-10-01					56.97	7.59	23.13	26.25	256	217	69	661	750	34290	2857.5	1628	1229.5	43.0271			0	0
Home 26	Control	2024-11-01					69.43	8.57	34.61	26.25	262	245	149	989	750	34290	2857.5	1984	873.5	30.5687			0	0
Home 26	Control	2024-12-01					76.54	10.01	40.28	26.25	272	286	121	1151	750	34290	2857.5	2187	670.5	23.4646			0	0
Home 27	Control	2020-01-01					83.52	16.32	21.84	45.36	172	204	105	273	567	15000	1250	1044	206	16.48			0	0
Home 27	Control	2020-02-01					79.52	15.28	18.88	45.36	152	191	85	236	567	15000	1250	994	256	20.48			0	0
Home 27	Control	2020-03-01					77.44	13.6	18.48	45.36	156	170	53	231	567	15000	1250	968	282	22.56			0	0
Home 27	Control	2020-04-01					75.76	11.92	18.48	45.36	143	149	77	231	567	15000	1250	947	303	24.24			0	0
Home 27	Control	2020-05-01					73.28	10.56	17.36	45.36	167	132	62	217	567	15000	1250	916	334	26.72			0	0
Home 27	Control	2020-06-01					76.88	9.52	22.0	45.36	143	119	41	275	567	15000	1250	961	289	23.12			0	0
Home 27	Control	2020-07-01					72.88	9.28	18.24	45.36	164	116	40	228	567	15000	1250	911	339	27.12			0	0
Home 27	Control	2020-08-01					74.4	9.76	19.28	45.36	150	122	48	241	567	15000	1250	930	320	25.6			0	0
Home 27	Control	2020-09-01					71.2	10.96	14.88	45.36	149	137	42	186	567	15000	1250	890	360	28.8			0	0
Home 27	Control	2020-10-01					78.24	12.48	20.4	45.36	164	156	64	255	567	15000	1250	978	272	21.76			0	0
Home 27	Control	2020-11-01					82.0	14.08	22.56	45.36	160	176	98	282	567	15000	1250	1025	225	18			0	0
Home 27	Control	2020-12-01					86.0	16.8	23.84	45.36	180	210	87	298	567	15000	1250	1075	175	14			0	0
Home 27	Control	2021-01-01					81.74	17.22	19.32	45.19	179	221	119	248	580	15400	1283.33	1049	234.333	18.2597			0	0
Home 27	Control	2021-02-01					85.56	16.83	23.53	45.19	175	216	85	302	580	15400	1283.33	1098	185.333	14.4416			0	0
Home 27	Control	2021-03-01					82.52	14.81	22.52	45.19	174	190	99	289	580	15400	1283.33	1059	224.333	17.4805			0	0
Home 27	Control	2021-04-01					79.01	13.01	20.81	45.19	183	167	73	267	580	15400	1283.33	1014	269.333	20.987			0	0
Home 27	Control	2021-05-01					81.04	11.53	24.31	45.19	171	148	45	312	580	15400	1283.33	1040	243.333	18.961			0	0
Home 27	Control	2021-06-01					80.26	10.36	24.7	45.19	158	133	58	317	580	15400	1283.33	1030	253.333	19.7403			0	0
Home 27	Control	2021-07-01					79.64	10.13	24.31	45.19	152	130	38	312	580	15400	1283.33	1022	261.333	20.3636			0	0
Home 27	Control	2021-08-01					80.34	10.68	24.47	45.19	170	137	42	314	580	15400	1283.33	1031	252.333	19.6623			0	0
Home 27	Control	2021-09-01					79.71	11.92	22.6	45.19	162	153	64	290	580	15400	1283.33	1023	260.333	20.2857			0	0
Home 27	Control	2021-10-01					86.49	13.71	27.58	45.19	158	176	96	354	580	15400	1283.33	1110	173.333	13.5065			0	0
Home 27	Control	2021-11-01					81.43	15.58	20.65	45.19	191	200	79	265	580	15400	1283.33	1045	238.333	18.5714			0	0
Home 27	Control	2021-12-01					89.38	18.39	25.79	45.19	172	236	123	331	580	15400	1283.33	1147	136.333	10.6234			0	0
Home 27	Control	2022-01-01					88.86	18.41	25.21	45.23	168	241	140	330	592	15705	1308.75	1163	145.75	11.1366			0	0
Home 27	Control	2022-02-01					92.15	17.65	29.26	45.23	185	231	138	383	592	15705	1308.75	1206	102.75	7.851			0	0
Home 27	Control	2022-03-01					92.23	15.82	31.17	45.23	181	207	106	408	592	15705	1308.75	1207	101.75	7.77459			0	0
Home 27	Control	2022-04-01					89.7	13.6	30.87	45.23	167	178	77	404	592	15705	1308.75	1174	134.75	10.2961			0	0
Home 27	Control	2022-05-01					90.93	12.23	33.47	45.23	177	160	59	438	592	15705	1308.75	1190	118.75	9.07354			0	0
Home 27	Control	2022-06-01					84.13	10.93	27.97	45.23	168	143	54	366	592	15705	1308.75	1101	207.75	15.8739			0	0
Home 27	Control	2022-07-01					84.2	10.77	28.19	45.23	196	141	41	369	592	15705	1308.75	1102	206.75	15.7975			0	0
Home 27	Control	2022-08-01					83.13	11.16	26.74	45.23	172	146	32	350	592	15705	1308.75	1088	220.75	16.8672			0	0
Home 27	Control	2022-09-01					85.58	12.45	27.89	45.23	164	163	73	365	592	15705	1308.75	1120	188.75	14.4222			0	0
Home 27	Control	2022-10-01					87.87	14.52	28.12	45.23	185	190	104	368	592	15705	1308.75	1150	158.75	12.1299			0	0
Home 27	Control	2022-11-01					89.55	16.5	27.81	45.23	190	216	71	364	592	15705	1308.75	1172	136.75	10.4489			0	0
Home 27	Control	2022-12-01					92.61	19.18	28.19	45.23	187	251	113	369	592	15705	1308.75	1212	96.75	7.39255			0	0
Home 27	Control	2023-01-01					95.55	17.7	32.03	45.82	177	236	125	427	611	16000	1333.33	1274	59.3333	4.45			0	0
Home 27	Control	2023-02-01					90.75	16.2	28.72	45.82	169	216	161	383	611	16000	1333.33	1210	123.333	9.25			0	0
Home 27	Control	2023-03-01					91.88	14.4	31.65	45.82	164	192	82	422	611	16000	1333.33	1225	108.333	8.125			0	0
Home 27	Control	2023-04-01					87.08	12.6	28.65	45.82	160	168	55	382	611	16000	1333.33	1161	172.333	12.925			0	0
Home 27	Control	2023-05-01					103.5	11.32	46.35	45.82	160	151	52	618	611	16000	1333.33	1380	-46.6667	-3.5			0	0
Home 27	Control	2023-06-01					77.85	9.98	22.05	45.82	159	133	59	294	611	16000	1333.33	1038	295.333	22.15			0	0
Home 27	Control	2023-07-01					84.08	9.75	28.5	45.82	163	130	32	380	611	16000	1333.33	1121	212.333	15.925			0	0
Home 27	Control	2023-08-01					80.4	10.42	24.15	45.82	168	139	35	322	611	16000	1333.33	1072	261.333	19.6			0	0
Home 27	Control	2023-09-01					93.0	11.55	35.62	45.82	166	154	48	475	611	16000	1333.33	1240	93.3333	7			0	0
Home 27	Control	2023-10-01					86.7	13.12	27.75	45.82	167	175	54	370	611	16000	1333.33	1156	177.333	13.3			0	0
Home 27	Control	2023-11-01					93.98	15.15	33.0	45.82	173	202	88	440	611	16000	1333.33	1253	80.3333	6.025			0	0
Home 27	Control	2023-12-01					90.82	17.92	27.08	45.82	178	239	163	361	611	16000	1333.33	1211	122.333	9.175			0	0
Home 27	Control	2024-01-01					88.73	17.25	25.25	46.24	154	235	120	344	630	16350	1362.5	1209	153.5	11.2661			0	0
Home 27	Control	2024-02-01					86.68	16.0	24.44	46.24	211	218	93	333	630	16350	1362.5	1181	181.5	13.3211			0	0
Home 27	Control	2024-03-01					83.74	14.24	23.27	46.24	158	194	77	317	630	16350	1362.5	1141	221.5	16.2569			0	0
Home 27	Control	2024-04-01					103.12	12.55	44.33	46.24	187	171	46	604	630	16350	1362.5	1405	-42.5	-3.11927			0	0
Home 27	Control	2024-05-01					84.92	11.16	27.52	46.24	192	152	69	375	630	16350	1362.5	1157	205.5	15.0826			0	0
Home 27	Control	2024-06-01					74.94	10.06	18.64	46.24	161	137	43	254	630	16350	1362.5	1021	341.5	25.0642			0	0
Home 27	Control	2024-07-01					94.97	9.61	39.12	46.24	182	131	38	533	630	16350	1362.5	1294	68.5	5.02752			0	0
Home 27	Control	2024-08-01					81.98	10.13	25.61	46.24	186	138	96	349	630	16350	1362.5	1117	245.5	18.0183			0	0
Home 27	Control	2024-09-01					78.97	11.38	21.36	46.24	156	155	60	291	630	16350	1362.5	1076	286.5	21.0275			0	0
Home 27	Control	2024-10-01					82.2	13.21	22.75	46.24	205	180	60	310	630	16350	1362.5	1120	242.5	17.7982			0	0
Home 27	Control	2024-11-01					92.26	15.05	30.97	46.24	187	205	80	422	630	16350	1362.5	1257	105.5	7.74312			0	0
Home 27	Control	2024-12-01					98.06	17.54	34.28	46.24	151	239	149	467	630	16350	1362.5	1336	26.5	1.94495			0	0
Home 28	Control	2020-01-01					79.94	6.9	18.52	54.52	90	73	27	196	577	12700	1058.33	846	212.333	20.063			0	0
Home 28	Control	2020-02-01					82.49	6.43	21.54	54.52	85	68	19	228	577	12700	1058.33	873	185.333	17.5118			0	0
Home 28	Control	2020-03-01					77.29	5.76	17.01	54.52	90	61	24	180	577	12700	1058.33	818	240.333	22.7087			0	0
Home 28	Control	2020-04-01					79.65	5.1	20.03	54.52	80	54	15	212	577	12700	1058.33	843	215.333	20.3465			0	0
Home 28	Control	2020-05-01					77.39	4.54	18.33	54.52	79	48	19	194	577	12700	1058.33	819	239.333	22.6142			0	0
Home 28	Control	2020-06-01					76.25	4.06	17.67	54.52	76	43	13	187	577	12700	1058.33	807	251.333	23.748			0	0
Home 28	Control	2020-07-01					78.05	3.97	19.56	54.52	82	42	9	207	577	12700	1058.33	826	232.333	21.9528			0	0
Home 28	Control	2020-08-01					77.76	4.06	19.18	54.52	85	43	13	203	577	12700	1058.33	823	235.333	22.2362			0	0
Home 28	Control	2020-09-01					77.76	4.63	18.61	54.52	84	49	14	197	577	12700	1058.33	823	235.333	22.2362			0	0
Home 28	Control	2020-10-01					77.29	5.39	17.39	54.52	84	57	20	184	577	12700	1058.33	818	240.333	22.7087			0	0
Home 28	Control	2020-11-01					76.63	5.95	16.16	54.52	88	63	23	171	577	12700	1058.33	811	247.333	23.3701			0	0
Home 28	Control	2020-12-01					84.66	7.09	23.06	54.52	96	75	23	244	577	12700	1058.33	896	162.333	15.3386			0	0
Home 28	Control	2021-01-01					81.58	8.12	20.81	52.65	105	89	30	228	577	13150	1095.83	894	201.833	18.4183			0	0
Home 28	Control	2021-02-01					82.95	8.12	22.17	52.65	102	89	41	243	577	13150	1095.83	909	186.833	17.0494			0	0
Home 28	Control	2021-03-01					86.33	7.21	26.46	52.65	102	79	26	290	577	13150	1095.83	946	149.833	13.673			0	0
Home 28	Control	2021-04-01					82.13	6.39	23.09	52.65	95	70	22	253	577	13150	1095.83	900	195.833	17.8707			0	0
Home 28	Control	2021-05-01					76.75	5.66	18.43	52.65	98	62	15	202	577	13150	1095.83	841	254.833	23.2548			0	0
Home 28	Control	2021-06-01					75.92	5.02	18.25	52.65	109	55	16	200	577	13150	1095.83	832	263.833	24.076			0	0
Home 28	Control	2021-07-01					84.41	4.93	26.83	52.65	92	54	20	294	577	13150	1095.83	925	170.833	15.5894			0	0
Home 28	Control	2021-08-01					75.1	5.2	17.25	52.65	102	57	12	189	577	13150	1095.83	823	272.833	24.8973			0	0
Home 28	Control	2021-09-01					77.57	5.75	19.16	52.65	110	63	19	210	577	13150	1095.83	850	245.833	22.4335			0	0
Home 28	Control	2021-10-01					81.86	6.75	22.45	52.65	108	74	31	246	577	13150	1095.83	897	198.833	18.1445			0	0
Home 28	Control	2021-11-01					81.76	7.48	21.63	52.65	116	82	29	237	577	13150	1095.83	896	199.833	18.2357			0	0
Home 28	Control	2021-12-01					80.49	8.94	18.89	52.65	110	98	41	207	577	13150	1095.83	882	213.833	19.5133			0	0
Home 28	Control	2022-01-01					82.44	9.28	21.68	51.48	116	104	30	243	577	13450	1120.83	924	196.833	17.5613			0	0
Home 28	Control	2022-02-01					87.88	9.1	27.3	51.48	115	102	36	306	577	13450	1120.83	985	135.833	12.119			0	0
Home 28	Control	2022-03-01					79.14	8.03	19.63	51.48	121	90	27	220	577	13450	1120.83	887	233.833	20.8625			0	0
Home 28	Control	2022-04-01					76.55	6.96	18.11	51.48	132	78	26	203	577	13450	1120.83	858	262.833	23.4498			0	0
Home 28	Control	2022-05-01					78.33	6.25	20.61	51.48	111	70	22	231	577	13450	1120.83	878	242.833	21.6654			0	0
Home 28	Control	2022-06-01					79.67	5.62	22.57	51.48	107	63	23	253	577	13450	1120.83	893	227.833	20.3271			0	0
Home 28	Control	2022-07-01					78.33	5.44	21.41	51.48	103	61	15	240	577	13450	1120.83	878	242.833	21.6654			0	0
Home 28	Control	2022-08-01					82.71	5.8	25.43	51.48	122	65	15	285	577	13450	1120.83	927	193.833	17.2937			0	0
Home 28	Control	2022-09-01					83.51	6.42	25.61	51.48	110	72	19	287	577	13450	1120.83	936	184.833	16.4907			0	0
Home 28	Control	2022-10-01					84.94	7.49	25.96	51.48	111	84	22	291	577	13450	1120.83	952	168.833	15.0632			0	0
Home 28	Control	2022-11-01					84.85	8.39	24.98	51.48	116	94	30	280	577	13450	1120.83	951	169.833	15.1524			0	0
Home 28	Control	2022-12-01					84.76	9.9	23.38	51.48	135	111	34	262	577	13450	1120.83	950	170.833	15.2416			0	0
Home 28	Control	2023-01-01					75.72	5.3	20.11	50.32	65	64	25	243	608	14500	1208.33	915	293.333	24.2759			0	0
Home 28	Control	2023-02-01					75.81	3.14	22.34	50.32	36	38	23	270	608	14500	1208.33	916	292.333	24.1931			0	0
Home 28	Control	2023-03-01					80.36	2.81	27.23	50.32	34	34	10	329	608	14500	1208.33	971	237.333	19.6414			0	0
Home 28	Control	2023-04-01					72.17	2.48	19.37	50.32	34	30	15	234	608	14500	1208.33	872	336.333	27.8345			0	0
Home 28	Control	2023-05-01					76.88	2.15	24.41	50.32	33	26	13	295	608	14500	1208.33	929	279.333	23.1172			0	0
Home 28	Control	2023-06-01					80.11	1.99	27.81	50.32	34	24	7	336	608	14500	1208.33	968	240.333	19.8897			0	0
Home 28	Control	2023-07-01					80.86	1.9	28.63	50.32	34	23	4	346	608	14500	1208.33	977	231.333	19.1448			0	0
Home 28	Control	2023-08-01					78.37	1.99	26.07	50.32	35	24	7	315	608	14500	1208.33	947	261.333	21.6276			0	0
Home 28	Control	2023-09-01					71.5	2.23	18.95	50.32	35	27	13	229	608	14500	1208.33	864	344.333	28.4966			0	0
Home 28	Control	2023-10-01					74.81	2.57	21.93	50.32	35	31	11	265	608	14500	1208.33	904	304.333	25.1862			0	0
Home 28	Control	2023-11-01					75.97	2.98	22.68	50.32	37	36	11	274	608	14500	1208.33	918	290.333	24.0276			0	0
Home 28	Control	2023-12-01					71.5	3.48	17.71	50.32	37	42	16	214	608	14500	1208.33	864	344.333	28.4966			0	0
Home 28	Control	2024-01-01					70.07	3.26	18.51	48.3	37	41	20	233	608	15105	1258.75	882	376.75	29.9305			0	0
Home 28	Control	2024-02-01					79.36	3.02	28.04	48.3	38	38	16	353	608	15105	1258.75	999	259.75	20.6356			0	0
Home 28	Control	2024-03-01					71.34	2.62	20.42	48.3	30	33	12	257	608	15105	1258.75	898	360.75	28.6594			0	0
Home 28	Control	2024-04-01					67.53	2.3	16.92	48.3	40	29	9	213	608	15105	1258.75	850	408.75	32.4727			0	0
Home 28	Control	2024-05-01					75.07	2.14	24.63	48.3	35	27	7	310	608	15105	1258.75	945	313.75	24.9255			0	0
Home 28	Control	2024-06-01					78.17	1.91	27.96	48.3	39	24	5	352	608	15105	1258.75	984	274.75	21.8272			0	0
Home 28	Control	2024-07-01					66.73	1.83	16.6	48.3	38	23	9	209	608	15105	1258.75	840	418.75	33.2671			0	0
Home 28	Control	2024-08-01					72.29	1.91	22.09	48.3	37	24	6	278	608	15105	1258.75	910	348.75	27.7061			0	0
Home 28	Control	2024-09-01					69.75	2.14	19.3	48.3	35	27	11	243	608	15105	1258.75	878	380.75	30.2483			0	0
Home 28	Control	2024-10-01					70.07	2.46	19.3	48.3	38	31	16	243	608	15105	1258.75	882	376.75	29.9305			0	0
Home 28	Control	2024-11-01					69.99	2.78	18.91	48.3	34	35	16	238	608	15105	1258.75	881	377.75	30.0099			0	0
Home 28	Control	2024-12-01					77.06	3.34	25.42	48.3	41	42	14	320	608	15105	1258.75	970	288.75	22.9394			0	0
Home 29	Control	2020-01-01					73.31	9.62	18.69	45.0	98	125	78	243	585	15600	1300	953	347	26.6923			0	0
Home 29	Control	2020-02-01					72.0	9.08	17.92	45.0	94	118	67	233	585	15600	1300	936	364	28			0	0
Home 29	Control	2020-03-01					74.92	8.08	21.85	45.0	93	105	48	284	585	15600	1300	974	326	25.0769			0	0
Home 29	Control	2020-04-01					73.62	7.08	21.54	45.0	85	92	48	280	585	15600	1300	957	343	26.3846			0	0
Home 29	Control	2020-05-01					69.69	6.31	18.38	45.0	87	82	30	239	585	15600	1300	906	394	30.3077			0	0
Home 29	Control	2020-06-01					67.77	5.62	17.15	45.0	81	73	36	223	585	15600	1300	881	419	32.2308			0	0
Home 29	Control	2020-07-01					69.31	5.46	18.85	45.0	84	71	25	245	585	15600	1300	901	399	30.6923			0	0
Home 29	Control	2020-08-01					66.31	5.69	15.62	45.0	99	74	30	203	585	15600	1300	862	438	33.6923			0	0
Home 29	Control	2020-09-01					72.08	6.38	20.69	45.0	90	83	39	269	585	15600	1300	937	363	27.9231			0	0
Home 29	Control	2020-10-01					73.15	7.38	20.77	45.0	94	96	46	270	585	15600	1300	951	349	26.8462			0	0
Home 29	Control	2020-11-01					70.15	8.46	16.69	45.0	93	110	66	217	585	15600	1300	912	388	29.8462			0	0
Home 29	Control	2020-12-01					77.46	9.92	22.54	45.0	97	129	68	293	585	15600	1300	1007	293	22.5385			0	0
Home 29	Control	2021-01-01					67.33	10.19	16.33	40.81	102	146	94	234	585	17200	1433.33	965	468.333	32.6744			0	0
Home 29	Control	2021-02-01					72.07	10.26	21.0	40.81	99	147	63	301	585	17200	1433.33	1033	400.333	27.9302			0	0
Home 29	Control	2021-03-01					72.42	8.93	22.67	40.81	103	128	68	325	585	17200	1433.33	1038	395.333	27.5814			0	0
Home 29	Control	2021-04-01					65.37	7.88	16.67	40.81	91	113	77	239	585	17200	1433.33	937	496.333	34.6279			0	0
Home 29	Control	2021-05-01					62.44	7.12	14.51	40.81	86	102	37	208	585	17200	1433.33	895	538.333	37.5581			0	0
Home 29	Control	2021-06-01					67.47	6.28	20.37	40.81	93	90	31	292	585	17200	1433.33	967	466.333	32.5349			0	0
Home 29	Control	2021-07-01					68.79	6.14	21.84	40.81	99	88	35	313	585	17200	1433.33	986	447.333	31.2093			0	0
Home 29	Control	2021-08-01					66.63	6.49	19.33	40.81	90	93	37	277	585	17200	1433.33	955	478.333	33.3721			0	0
Home 29	Control	2021-09-01					65.51	7.19	17.51	40.81	100	103	48	251	585	17200	1433.33	939	494.333	34.4884			0	0
Home 29	Control	2021-10-01					68.93	8.37	19.74	40.81	102	120	63	283	585	17200	1433.33	988	445.333	31.0698			0	0
Home 29	Control	2021-11-01					65.44	9.42	15.21	40.81	110	135	78	218	585	17200	1433.33	938	495.333	34.5581			0	0
Home 29	Control	2021-12-01					73.47	11.16	21.49	40.81	115	160	109	308	585	17200	1433.33	1053	380.333	26.5349			0	0
Home 29	Control	2022-01-01					76.91	12.0	19.32	45.58	126	154	87	248	585	15400	1283.33	987	296.333	23.0909			0	0
Home 29	Control	2022-02-01					77.22	11.06	20.57	45.58	120	142	66	264	585	15400	1283.33	991	292.333	22.7792			0	0
Home 29	Control	2022-03-01					80.42	9.74	25.09	45.58	109	125	65	322	585	15400	1283.33	1032	251.333	19.5844			0	0
Home 29	Control	2022-04-01					79.09	8.49	25.01	45.58	121	109	65	321	585	15400	1283.33	1015	268.333	20.9091			0	0
Home 29	Control	2022-05-01					74.81	7.71	21.51	45.58	121	99	38	276	585	15400	1283.33	960	323.333	25.1948			0	0
Home 29	Control	2022-06-01					72.78	6.94	20.26	45.58	109	89	25	260	585	15400	1283.33	934	349.333	27.2208			0	0
Home 29	Control	2022-07-01					74.65	6.62	22.44	45.58	114	85	33	288	585	15400	1283.33	958	325.333	25.3506			0	0
Home 29	Control	2022-08-01					72.39	6.94	19.87	45.58	106	89	29	255	585	15400	1283.33	929	354.333	27.6104			0	0
Home 29	Control	2022-09-01					78.7	7.79	25.32	45.58	111	100	26	325	585	15400	1283.33	1010	273.333	21.2987			0	0
Home 29	Control	2022-10-01					74.57	8.96	20.03	45.58	109	115	56	257	585	15400	1283.33	957	326.333	25.4286			0	0
Home 29	Control	2022-11-01					75.27	10.29	19.4	45.58	122	132	55	249	585	15400	1283.33	966	317.333	24.7273			0	0
Home 29	Control	2022-12-01					83.77	12.0	26.18	45.58	121	154	74	336	585	15400	1283.33	1075	208.333	16.2338			0	0
Home 29	Control	2023-01-01					79.17	10.22	25.63	43.31	111	144	75	361	610	16900	1408.33	1115	293.333	20.8284			0	0
Home 29	Control	2023-02-01					74.13	9.23	21.59	43.31	103	130	64	304	610	16900	1408.33	1044	364.333	25.8698			0	0
Home 29	Control	2023-03-01					73.92	8.31	22.3	43.31	101	117	62	314	610	16900	1408.33	1041	367.333	26.0828			0	0
Home 29	Control	2023-04-01					74.13	7.24	23.57	43.31	98	102	37	332	610	16900	1408.33	1044	364.333	25.8698			0	0
Home 29	Control	2023-05-01					71.08	6.46	21.3	43.31	97	91	39	300	610	16900	1408.33	1001	407.333	28.9231			0	0
Home 29	Control	2023-06-01					74.98	5.82	25.85	43.31	99	82	26	364	610	16900	1408.33	1056	352.333	25.0178			0	0
Home 29	Control	2023-07-01					73.28	5.61	24.36	43.31	100	79	30	343	610	16900	1408.33	1032	376.333	26.7219			0	0
Home 29	Control	2023-08-01					68.02	5.89	18.82	43.31	102	83	31	265	610	16900	1408.33	958	450.333	31.9763			0	0
Home 29	Control	2023-09-01					73.07	6.53	23.22	43.31	101	92	27	327	610	16900	1408.33	1029	379.333	26.9349			0	0
Home 29	Control	2023-10-01					83.01	7.67	32.02	43.31	104	108	58	451	610	16900	1408.33	1169	239.333	16.9941			0	0
Home 29	Control	2023-11-01					73.07	8.59	21.16	43.31	105	121	47	298	610	16900	1408.33	1029	379.333	26.9349			0	0
Home 29	Control	2023-12-01					77.89	10.3	24.28	43.31	109	145	85	342	610	16900	1408.33	1097	311.333	22.1065			0	0
Home 29	Control	2024-01-01					63.92	6.13	19.26	38.53	104	97	71	305	610	19000	1583.33	1012	571.333	36.0842			0	0
Home 29	Control	2024-02-01					63.35	4.48	20.34	38.53	93	71	96	322	610	19000	1583.33	1003	580.333	36.6526			0	0
Home 29	Control	2024-03-01					58.99	3.98	16.48	38.53	93	63	48	261	610	19000	1583.33	934	649.333	41.0105			0	0
Home 29	Control	2024-04-01					60.38	3.47	18.38	38.53	86	55	38	291	610	19000	1583.33	956	627.333	39.6211			0	0
Home 29	Control	2024-05-01					62.46	3.09	20.84	38.53	100	49	34	330	610	19000	1583.33	989	594.333	37.5368			0	0
Home 29	Control	2024-06-01					65.43	2.78	24.13	38.53	97	44	25	382	610	19000	1583.33	1036	547.333	34.5684			0	0
Home 29	Control	2024-07-01					65.12	2.72	23.87	38.53	83	43	29	378	610	19000	1583.33	1031	552.333	34.8842			0	0
Home 29	Control	2024-08-01					64.17	2.84	22.8	38.53	88	45	18	361	610	19000	1583.33	1016	567.333	35.8316			0	0
Home 29	Control	2024-09-01					64.29	3.22	22.55	38.53	100	51	26	357	610	19000	1583.33	1018	565.333	35.7053			0	0
Home 29	Control	2024-10-01					60.13	3.66	17.94	38.53	79	58	34	284	610	19000	1583.33	952	631.333	39.8737			0	0
Home 29	Control	2024-11-01					57.92	4.11	15.28	38.53	94	65	67	242	610	19000	1583.33	917	666.333	42.0842			0	0
Home 29	Control	2024-12-01					61.52	4.93	18.06	38.53	91	78	104	286	610	19000	1583.33	974	609.333	38.4842			0	0
Home 30	Renovation	2020-01-01	2022	March	2022-03-01		47.69	9.63	14.33	23.73	377	281	103	418	692	35000	2916.67	1391	1525.67	52.3086	-26.0		0	0
Home 30	Renovation	2020-02-01	2022	March	2022-03-01		49.89	9.19	16.97	23.73	347	268	95	495	692	35000	2916.67	1455	1461.67	50.1143	-25.0		0	0
Home 30	Renovation	2020-03-01	2022	March	2022-03-01		46.08	8.06	14.3	23.73	287	235	83	417	692	35000	2916.67	1344	1572.67	53.92	-24.0		0	0
Home 30	Renovation	2020-04-01	2022	March	2022-03-01		45.02	7.13	14.16	23.73	304	208	82	413	692	35000	2916.67	1313	1603.67	54.9829	-23.0		0	0
Home 30	Renovation	2020-05-01	2022	March	2022-03-01		47.79	6.41	17.66	23.73	348	187	47	515	692	35000	2916.67	1394	1522.67	52.2057	-22.0		0	0
Home 30	Renovation	2020-06-01	2022	March	2022-03-01		48.79	5.69	19.37	23.73	328	166	45	565	692	35000	2916.67	1423	1493.67	51.2114	-21.0		0	0
Home 30	Renovation	2020-07-01	2022	March	2022-03-01		47.66	5.49	18.45	23.73	282	160	47	538	692	35000	2916.67	1390	1526.67	52.3429	-20.0		0	0
Home 30	Renovation	2020-08-01	2022	March	2022-03-01		43.65	5.76	14.16	23.73	287	168	46	413	692	35000	2916.67	1273	1643.67	56.3543	-19.0		0	0
Home 30	Renovation	2020-09-01	2022	March	2022-03-01		42.41	6.45	12.24	23.73	319	188	56	357	692	35000	2916.67	1237	1679.67	57.5886	-18.0		0	0
Home 30	Renovation	2020-10-01	2022	March	2022-03-01		45.29	7.47	14.09	23.73	323	218	85	411	692	35000	2916.67	1321	1595.67	54.7086	-17.0		0	0
Home 30	Renovation	2020-11-01	2022	March	2022-03-01		47.59	8.5	15.36	23.73	324	248	53	448	692	35000	2916.67	1388	1528.67	52.4114	-16.0		0	0
Home 30	Renovation	2020-12-01	2022	March	2022-03-01		51.26	10.05	17.49	23.73	331	293	124	510	692	35000	2916.67	1495	1421.67	48.7429	-15.0		0	0
Home 30	Renovation	2021-01-01	2022	March	2022-03-01		45.17	9.17	13.94	22.06	331	298	103	453	717	39000	3250	1468	1782	54.8308	-14.0		0	0
Home 30	Renovation	2021-02-01	2022	March	2022-03-01		47.88	8.83	16.98	22.06	413	287	81	552	717	39000	3250	1556	1694	52.1231	-13.0		0	0
Home 30	Renovation	2021-03-01	2022	March	2022-03-01		46.0	7.75	16.18	22.06	332	252	103	526	717	39000	3250	1495	1755	54	-12.0		0	0
Home 30	Renovation	2021-04-01	2022	March	2022-03-01		44.06	6.86	15.14	22.06	309	223	97	492	717	39000	3250	1432	1818	55.9385	-11.0		0	0
Home 30	Renovation	2021-05-01	2022	March	2022-03-01		41.23	6.15	13.02	22.06	336	200	61	423	717	39000	3250	1340	1910	58.7692	-10.0		0	0
Home 30	Renovation	2021-06-01	2022	March	2022-03-01		45.2	5.45	17.69	22.06	314	177	58	575	717	39000	3250	1469	1781	54.8	-9.0		0	0
Home 30	Renovation	2021-07-01	2022	March	2022-03-01		42.83	5.29	15.48	22.06	295	172	60	503	717	39000	3250	1392	1858	57.1692	-8.0		0	0
Home 30	Renovation	2021-08-01	2022	March	2022-03-01		40.25	5.6	12.58	22.06	315	182	62	409	717	39000	3250	1308	1942	59.7538	-7.0		0	0
Home 30	Renovation	2021-09-01	2022	March	2022-03-01		46.06	6.15	17.85	22.06	327	200	83	580	717	39000	3250	1497	1753	53.9385	-6.0		0	0
Home 30	Renovation	2021-10-01	2022	March	2022-03-01		48.37	7.17	19.14	22.06	348	233	91	622	717	39000	3250	1572	1678	51.6308	-5.0		0	0
Home 30	Renovation	2021-11-01	2022	March	2022-03-01		45.23	8.18	14.98	22.06	352	266	100	487	717	39000	3250	1470	1780	54.7692	-4.0		0	0
Home 30	Renovation	2021-12-01	2022	March	2022-03-01		46.28	9.51	14.71	22.06	327	309	92	478	717	39000	3250	1504	1746	53.7231	-3.0		0	0
Home 30	Renovation	2022-01-01	2022	March	2022-03-01		52.13	12.14	18.59	21.4	383	435	101	666	767	43000	3583.33	1868	1715.33	47.8698	-2.0		0	0
Home 30	Renovation	2022-02-01	2022	March	2022-03-01		53.86	13.14	19.31	21.4	389	471	75	692	767	43000	3583.33	1930	1653.33	46.1395	-1.0		0	0
Home 30	Renovation	2022-03-01	2022	March	2022-03-01		47.58	8.12	18.06	21.4	329	291	76	647	767	43000	3583.33	1705	1878.33	52.4186	0.0		1	0
Home 30	Renovation	2022-04-01	2022	March	2022-03-01		41.44	7.09	12.95	21.4	322	254	40	464	767	43000	3583.33	1485	2098.33	58.5581	1.0		1	0
Home 30	Renovation	2022-05-01	2022	March	2022-03-01		43.4	6.33	15.66	21.4	335	227	35	561	767	43000	3583.33	1555	2028.33	56.6047	2.0		1	0
Home 30	Renovation	2022-06-01	2022	March	2022-03-01		42.25	5.67	15.18	21.4	339	203	29	544	767	43000	3583.33	1514	2069.33	57.7488	3.0		1	0
Home 30	Renovation	2022-07-01	2022	March	2022-03-01		45.18	5.5	18.28	21.4	340	197	24	655	767	43000	3583.33	1619	1964.33	54.8186	4.0		1	0
Home 30	Renovation	2022-08-01	2022	March	2022-03-01		47.53	5.75	20.37	21.4	336	206	36	730	767	43000	3583.33	1703	1880.33	52.4744	5.0		1	0
Home 30	Renovation	2022-09-01	2022	March	2022-03-01		44.79	6.45	16.94	21.4	308	231	31	607	767	43000	3583.33	1605	1978.33	55.2093	6.0		1	0
Home 30	Renovation	2022-10-01	2022	March	2022-03-01		45.35	7.51	16.44	21.4	383	269	45	589	767	43000	3583.33	1625	1958.33	54.6512	7.0		1	0
Home 30	Renovation	2022-11-01	2022	March	2022-03-01		44.07	8.48	14.18	21.4	333	304	47	508	767	43000	3583.33	1579	2004.33	55.9349	8.0		1	0
Home 30	Renovation	2022-12-01	2022	March	2022-03-01		47.02	10.07	15.54	21.4	414	361	54	557	767	43000	3583.33	1685	1898.33	52.9767	9.0		1	0
Home 30	Renovation	2023-01-01	2022	March	2022-03-01		46.83	10.29	15.68	20.86	402	403	66	614	817	47000	3916.67	1834	2082.67	53.1745	10.0		1	0
Home 30	Renovation	2023-02-01	2022	March	2022-03-01		51.42	10.26	20.3	20.86	409	402	60	795	817	47000	3916.67	2014	1902.67	48.5787	11.0		1	0
Home 30	Renovation	2023-03-01	2022	March	2022-03-01		44.45	8.96	14.63	20.86	392	351	49	573	817	47000	3916.67	1741	2175.67	55.5489	12.0		1	0
Home 30	Renovation	2023-04-01	2022	March	2022-03-01		43.1	7.84	14.4	20.86	384	307	34	564	817	47000	3916.67	1688	2228.67	56.9021	13.0		1	0
Home 30	Renovation	2023-05-01	2022	March	2022-03-01		41.29	7.02	13.4	20.86	379	275	23	525	817	47000	3916.67	1617	2299.67	58.7149	14.0		1	0
Home 30	Renovation	2023-06-01	2022	March	2022-03-01		40.21	6.38	12.97	20.86	390	250	24	508	817	47000	3916.67	1575	2341.67	59.7872	15.0		1	0
Home 30	Renovation	2023-07-01	2022	March	2022-03-01		46.6	6.18	19.56	20.86	397	242	14	766	817	47000	3916.67	1825	2091.67	53.4043	16.0		1	0
Home 30	Renovation	2023-08-01	2022	March	2022-03-01		43.12	6.51	15.75	20.86	405	255	26	617	817	47000	3916.67	1689	2227.67	56.8766	17.0		1	0
Home 30	Renovation	2023-09-01	2022	March	2022-03-01		47.03	7.25	18.92	20.86	400	284	25	741	817	47000	3916.67	1842	2074.67	52.9702	18.0		1	0
Home 30	Renovation	2023-10-01	2022	March	2022-03-01		40.83	8.37	11.59	20.86	408	328	21	454	817	47000	3916.67	1599	2317.67	59.1745	19.0		1	0
Home 30	Renovation	2023-11-01	2022	March	2022-03-01		45.68	9.52	15.29	20.86	417	373	28	599	817	47000	3916.67	1789	2127.67	54.3234	20.0		1	0
Home 30	Renovation	2023-12-01	2022	March	2022-03-01		55.1	11.18	23.06	20.86	428	438	30	903	817	47000	3916.67	2158	1758.67	44.9021	21.0		1	0
Home 30	Renovation	2024-01-01	2022	March	2022-03-01		41.88	8.99	12.31	20.59	397	382	73	523	875	51000	4250	1780	2470	58.1176	22.0		1	0
Home 30	Renovation	2024-02-01	2022	March	2022-03-01		41.01	7.81	12.61	20.59	312	332	87	536	875	51000	4250	1743	2507	58.9882	23.0		1	0
Home 30	Renovation	2024-03-01	2022	March	2022-03-01		42.61	6.89	15.13	20.59	356	293	34	643	875	51000	4250	1811	2439	57.3882	24.0		1	0
Home 30	Renovation	2024-04-01	2022	March	2022-03-01		42.14	6.09	15.46	20.59	374	259	44	657	875	51000	4250	1791	2459	57.8588	25.0		1	0
Home 30	Renovation	2024-05-01	2022	March	2022-03-01		42.68	5.48	16.61	20.59	341	233	33	706	875	51000	4250	1814	2436	57.3176	26.0		1	0
Home 30	Renovation	2024-06-01	2022	March	2022-03-01		40.96	4.92	15.46	20.59	265	209	29	657	875	51000	4250	1741	2509	59.0353	27.0		1	0
Home 30	Renovation	2024-07-01	2022	March	2022-03-01		41.39	4.71	16.09	20.59	311	200	23	684	875	51000	4250	1759	2491	58.6118	28.0		1	0
Home 30	Renovation	2024-08-01	2022	March	2022-03-01		41.51	4.96	15.95	20.59	342	211	18	678	875	51000	4250	1764	2486	58.4941	29.0		1	0
Home 30	Renovation	2024-09-01	2022	March	2022-03-01		39.51	5.53	13.39	20.59	379	235	24	569	875	51000	4250	1679	2571	60.4941	30.0		1	0
Home 30	Renovation	2024-10-01	2022	March	2022-03-01		41.44	6.42	14.42	20.59	321	273	25	613	875	51000	4250	1761	2489	58.5647	31.0		1	0
Home 30	Renovation	2024-11-01	2022	March	2022-03-01		40.26	7.27	12.4	20.59	280	309	41	527	875	51000	4250	1711	2539	59.7412	32.0		1	0
Home 30	Renovation	2024-12-01	2022	March	2022-03-01		46.75	8.56	17.6	20.59	422	364	37	748	875	51000	4250	1987	2263	53.2471	33.0		1	0
Home 31	Renovation	2020-01-01	2022	April	2022-04-01		79.2	10.8	22.4	46.0	151	135	132	280	575	15000	1250	990	260	20.8	-27.0		0	0
Home 31	Renovation	2020-02-01	2022	April	2022-04-01		82.48	10.16	26.32	46.0	170	127	86	329	575	15000	1250	1031	219	17.52	-26.0		0	0
Home 31	Renovation	2020-03-01	2022	April	2022-04-01		79.76	9.04	24.72	46.0	147	113	64	309	575	15000	1250	997	253	20.24	-25.0		0	0
Home 31	Renovation	2020-04-01	2022	April	2022-04-01		79.04	7.92	25.12	46.0	150	99	45	314	575	15000	1250	988	262	20.96	-24.0		0	0
Home 31	Renovation	2020-05-01	2022	April	2022-04-01		78.96	7.12	25.84	46.0	134	89	35	323	575	15000	1250	987	263	21.04	-23.0		0	0
Home 31	Renovation	2020-06-01	2022	April	2022-04-01		80.32	6.32	28.0	46.0	132	79	29	350	575	15000	1250	1004	246	19.68	-22.0		0	0
Home 31	Renovation	2020-07-01	2022	April	2022-04-01		82.48	6.16	30.32	46.0	161	77	37	379	575	15000	1250	1031	219	17.52	-21.0		0	0
Home 31	Renovation	2020-08-01	2022	April	2022-04-01		76.96	6.48	24.48	46.0	152	81	42	306	575	15000	1250	962	288	23.04	-20.0		0	0
Home 31	Renovation	2020-09-01	2022	April	2022-04-01		79.84	7.2	26.64	46.0	144	90	36	333	575	15000	1250	998	252	20.16	-19.0		0	0
Home 31	Renovation	2020-10-01	2022	April	2022-04-01		82.32	8.4	27.92	46.0	159	105	73	349	575	15000	1250	1029	221	17.68	-18.0		0	0
Home 31	Renovation	2020-11-01	2022	April	2022-04-01		81.84	9.6	26.24	46.0	143	120	71	328	575	15000	1250	1023	227	18.16	-17.0		0	0
Home 31	Renovation	2020-12-01	2022	April	2022-04-01		89.12	11.12	32.0	46.0	156	139	99	400	575	15000	1250	1114	136	10.88	-16.0		0	0
Home 31	Renovation	2021-01-01	2022	April	2022-04-01		83.92	11.61	26.88	45.43	179	149	128	345	583	15400	1283.33	1077	206.333	16.0779	-15.0		0	0
Home 31	Renovation	2021-02-01	2022	April	2022-04-01		87.66	11.38	30.86	45.43	166	146	105	396	583	15400	1283.33	1125	158.333	12.3377	-14.0		0	0
Home 31	Renovation	2021-03-01	2022	April	2022-04-01		79.4	9.97	24.0	45.43	163	128	71	308	583	15400	1283.33	1019	264.333	20.5974	-13.0		0	0
Home 31	Renovation	2021-04-01	2022	April	2022-04-01		91.01	8.81	36.78	45.43	143	113	52	472	583	15400	1283.33	1168	115.333	8.98701	-12.0		0	0
Home 31	Renovation	2021-05-01	2022	April	2022-04-01		79.09	7.79	25.87	45.43	153	100	34	332	583	15400	1283.33	1015	268.333	20.9091	-11.0		0	0
Home 31	Renovation	2021-06-01	2022	April	2022-04-01		85.25	6.94	32.88	45.43	188	89	35	422	583	15400	1283.33	1094	189.333	14.7532	-10.0		0	0
Home 31	Renovation	2021-07-01	2022	April	2022-04-01		84.47	6.86	32.18	45.43	141	88	34	413	583	15400	1283.33	1084	199.333	15.5325	-9.0		0	0
Home 31	Renovation	2021-08-01	2022	April	2022-04-01		87.04	7.25	34.36	45.43	164	93	33	441	583	15400	1283.33	1117	166.333	12.961	-8.0		0	0
Home 31	Renovation	2021-09-01	2022	April	2022-04-01		84.08	8.03	30.62	45.43	170	103	49	393	583	15400	1283.33	1079	204.333	15.9221	-7.0		0	0
Home 31	Renovation	2021-10-01	2022	April	2022-04-01		80.1	9.35	25.32	45.43	168	120	65	325	583	15400	1283.33	1028	255.333	19.8961	-6.0		0	0
Home 31	Renovation	2021-11-01	2022	April	2022-04-01		75.43	10.52	19.48	45.43	188	135	76	250	583	15400	1283.33	968	315.333	24.5714	-5.0		0	0
Home 31	Renovation	2021-12-01	2022	April	2022-04-01		85.25	12.39	27.43	45.43	177	159	89	352	583	15400	1283.33	1094	189.333	14.7532	-4.0		0	0
Home 31	Renovation	2022-01-01	2022	April	2022-04-01		98.45	13.15	37.53	47.77	211	172	80	491	625	15700	1308.33	1288	20.3333	1.55414	-3.0		0	0
Home 31	Renovation	2022-02-01	2022	April	2022-04-01		94.32	12.61	33.94	47.77	203	165	67	444	625	15700	1308.33	1234	74.3333	5.68153	-2.0		0	0
Home 31	Renovation	2022-03-01	2022	April	2022-04-01		88.82	11.31	29.73	47.77	173	148	43	389	625	15700	1308.33	1162	146.333	11.1847	-1.0		0	0
Home 31	Renovation	2022-04-01	2022	April	2022-04-01		83.77	6.88	29.12	47.77	202	90	39	381	625	15700	1308.33	1096	212.333	16.2293	0.0		1	0
Home 31	Renovation	2022-05-01	2022	April	2022-04-01		83.92	6.27	29.89	47.77	178	82	25	391	625	15700	1308.33	1098	210.333	16.0764	1.0		1	0
Home 31	Renovation	2022-06-01	2022	April	2022-04-01		85.76	5.58	32.41	47.77	155	73	19	424	625	15700	1308.33	1122	186.333	14.242	2.0		1	0
Home 31	Renovation	2022-07-01	2022	April	2022-04-01		87.21	5.43	34.01	47.77	186	71	20	445	625	15700	1308.33	1141	167.333	12.7898	3.0		1	0
Home 31	Renovation	2022-08-01	2022	April	2022-04-01		95.08	5.66	41.66	47.77	177	74	20	545	625	15700	1308.33	1244	64.3333	4.9172	4.0		1	0
Home 31	Renovation	2022-09-01	2022	April	2022-04-01		89.66	6.34	35.54	47.77	211	83	29	465	625	15700	1308.33	1173	135.333	10.3439	5.0		1	0
Home 31	Renovation	2022-10-01	2022	April	2022-04-01		86.75	7.34	31.64	47.77	207	96	34	414	625	15700	1308.33	1135	173.333	13.2484	6.0		1	0
Home 31	Renovation	2022-11-01	2022	April	2022-04-01		91.87	8.18	35.92	47.77	180	107	34	470	625	15700	1308.33	1202	106.333	8.12739	7.0		1	0
Home 31	Renovation	2022-12-01	2022	April	2022-04-01		91.11	9.71	33.63	47.77	216	127	52	440	625	15700	1308.33	1192	116.333	8.89172	8.0		1	0
Home 31	Renovation	2023-01-01	2022	April	2022-04-01		106.36	10.21	45.33	50.82	196	134	56	595	667	15750	1312.5	1396	-83.5	-6.3619	9.0		1	0
Home 31	Renovation	2023-02-01	2022	April	2022-04-01		87.01	9.83	26.36	50.82	189	129	69	346	667	15750	1312.5	1142	170.5	12.9905	10.0		1	0
Home 31	Renovation	2023-03-01	2022	April	2022-04-01		98.82	8.76	39.24	50.82	185	115	59	515	667	15750	1312.5	1297	15.5	1.18095	11.0		1	0
Home 31	Renovation	2023-04-01	2022	April	2022-04-01		86.1	7.62	27.66	50.82	180	100	44	363	667	15750	1312.5	1130	182.5	13.9048	12.0		1	0
Home 31	Renovation	2023-05-01	2022	April	2022-04-01		91.05	6.86	33.37	50.82	179	90	34	438	667	15750	1312.5	1195	117.5	8.95238	13.0		1	0
Home 31	Renovation	2023-06-01	2022	April	2022-04-01		97.37	6.17	40.38	50.82	182	81	17	530	667	15750	1312.5	1278	34.5	2.62857	14.0		1	0
Home 31	Renovation	2023-07-01	2022	April	2022-04-01		96.08	5.87	39.39	50.82	183	77	20	517	667	15750	1312.5	1261	51.5	3.92381	15.0		1	0
Home 31	Renovation	2023-08-01	2022	April	2022-04-01		92.04	6.25	34.97	50.82	188	82	24	459	667	15750	1312.5	1208	104.5	7.9619	16.0		1	0
Home 31	Renovation	2023-09-01	2022	April	2022-04-01		94.4	6.93	36.65	50.82	186	91	29	481	667	15750	1312.5	1239	73.5	5.6	17.0		1	0
Home 31	Renovation	2023-10-01	2022	April	2022-04-01		85.79	8.0	26.97	50.82	189	105	26	354	667	15750	1312.5	1126	186.5	14.2095	18.0		1	0
Home 31	Renovation	2023-11-01	2022	April	2022-04-01		87.39	9.14	27.43	50.82	193	120	46	360	667	15750	1312.5	1147	165.5	12.6095	19.0		1	0
Home 31	Renovation	2023-12-01	2022	April	2022-04-01		104.53	10.9	42.82	50.82	201	143	32	562	667	15750	1312.5	1372	-59.5	-4.53333	20.0		1	0
Home 31	Renovation	2024-01-01	2022	April	2022-04-01		103.43	10.11	41.05	52.27	198	137	78	556	708	16254	1354.5	1401	-46.5	-3.433	21.0		1	0
Home 31	Renovation	2024-02-01	2022	April	2022-04-01		96.35	9.45	34.63	52.27	177	128	58	469	708	16254	1354.5	1305	49.5	3.65449	22.0		1	0
Home 31	Renovation	2024-03-01	2022	April	2022-04-01		92.36	8.27	31.82	52.27	194	112	39	431	708	16254	1354.5	1251	103.5	7.6412	23.0		1	0
Home 31	Renovation	2024-04-01	2022	April	2022-04-01		95.98	7.31	36.4	52.27	171	99	56	493	708	16254	1354.5	1300	54.5	4.02362	24.0		1	0
Home 31	Renovation	2024-05-01	2022	April	2022-04-01		90.59	6.5	31.82	52.27	193	88	20	431	708	16254	1354.5	1227	127.5	9.41307	25.0		1	0
Home 31	Renovation	2024-06-01	2022	April	2022-04-01		94.57	5.83	36.47	52.27	229	79	26	494	708	16254	1354.5	1281	73.5	5.42636	26.0		1	0
Home 31	Renovation	2024-07-01	2022	April	2022-04-01		91.55	5.61	33.67	52.27	189	76	22	456	708	16254	1354.5	1240	114.5	8.4533	27.0		1	0
Home 31	Renovation	2024-08-01	2022	April	2022-04-01		90.22	5.98	31.97	52.27	198	81	16	433	708	16254	1354.5	1222	132.5	9.78221	28.0		1	0
Home 31	Renovation	2024-09-01	2022	April	2022-04-01		82.32	6.72	23.33	52.27	174	91	31	316	708	16254	1354.5	1115	239.5	17.6818	29.0		1	0
Home 31	Renovation	2024-10-01	2022	April	2022-04-01		92.65	7.6	32.78	52.27	185	103	24	444	708	16254	1354.5	1255	99.5	7.34588	30.0		1	0
Home 31	Renovation	2024-11-01	2022	April	2022-04-01		94.06	8.71	33.07	52.27	210	118	28	448	708	16254	1354.5	1274	80.5	5.94315	31.0		1	0
Home 31	Renovation	2024-12-01	2022	April	2022-04-01		101.07	10.41	38.39	52.27	202	141	33	520	708	16254	1354.5	1369	-14.5	-1.07051	32.0		1	0
Home 32	Renovation	2020-01-01	2022	June	2022-06-01		64.87	8.93	25.4	30.53	175	134	183	381	458	18000	1500	973	527	35.1333	-29.0		0	0
Home 32	Renovation	2020-02-01	2022	June	2022-06-01		60.2	8.4	21.27	30.53	199	126	200	319	458	18000	1500	903	597	39.8	-28.0		0	0
Home 32	Renovation	2020-03-01	2022	June	2022-06-01		72.47	7.53	34.4	30.53	184	113	168	516	458	18000	1500	1087	413	27.5333	-27.0		0	0
Home 32	Renovation	2020-04-01	2022	June	2022-06-01		68.0	6.47	31.0	30.53	205	97	85	465	458	18000	1500	1020	480	32	-26.0		0	0
Home 32	Renovation	2020-05-01	2022	June	2022-06-01		65.33	5.93	28.87	30.53	182	89	123	433	458	18000	1500	980	520	34.6667	-25.0		0	0
Home 32	Renovation	2020-06-01	2022	June	2022-06-01		60.53	5.27	24.73	30.53	154	79	57	371	458	18000	1500	908	592	39.4667	-24.0		0	0
Home 32	Renovation	2020-07-01	2022	June	2022-06-01		60.4	5.13	24.73	30.53	171	77	84	371	458	18000	1500	906	594	39.6	-23.0		0	0
Home 32	Renovation	2020-08-01	2022	June	2022-06-01		64.33	5.33	28.47	30.53	156	80	92	427	458	18000	1500	965	535	35.6667	-22.0		0	0
Home 32	Renovation	2020-09-01	2022	June	2022-06-01		64.87	6.07	28.27	30.53	206	91	80	424	458	18000	1500	973	527	35.1333	-21.0		0	0
Home 32	Renovation	2020-10-01	2022	June	2022-06-01		60.53	6.87	23.13	30.53	166	103	115	347	458	18000	1500	908	592	39.4667	-20.0		0	0
Home 32	Renovation	2020-11-01	2022	June	2022-06-01		63.07	7.87	24.67	30.53	200	118	125	370	458	18000	1500	946	554	36.9333	-19.0		0	0
Home 32	Renovation	2020-12-01	2022	June	2022-06-01		71.53	9.27	31.73	30.53	204	139	187	476	458	18000	1500	1073	427	28.4667	-18.0		0	0
Home 32	Renovation	2021-01-01	2022	June	2022-06-01		63.57	9.7	23.3	30.57	200	152	179	365	479	18800	1566.67	996	570.667	36.4255	-17.0		0	0
Home 32	Renovation	2021-02-01	2022	June	2022-06-01		71.11	9.57	30.96	30.57	215	150	204	485	479	18800	1566.67	1114	452.667	28.8936	-16.0		0	0
Home 32	Renovation	2021-03-01	2022	June	2022-06-01		65.49	8.49	26.43	30.57	212	133	189	414	479	18800	1566.67	1026	540.667	34.5106	-15.0		0	0
Home 32	Renovation	2021-04-01	2022	June	2022-06-01		69.77	7.47	31.72	30.57	211	117	156	497	479	18800	1566.67	1093	473.667	30.234	-14.0		0	0
Home 32	Renovation	2021-05-01	2022	June	2022-06-01		63.64	6.7	26.36	30.57	199	105	90	413	479	18800	1566.67	997	569.667	36.3617	-13.0		0	0
Home 32	Renovation	2021-06-01	2022	June	2022-06-01		67.21	6.0	30.64	30.57	182	94	76	480	479	18800	1566.67	1053	513.667	32.7872	-12.0		0	0
Home 32	Renovation	2021-07-01	2022	June	2022-06-01		65.74	5.81	29.36	30.57	202	91	53	460	479	18800	1566.67	1030	536.667	34.2553	-11.0		0	0
Home 32	Renovation	2021-08-01	2022	June	2022-06-01		71.55	6.06	34.91	30.57	204	95	67	547	479	18800	1566.67	1121	445.667	28.4468	-10.0		0	0
Home 32	Renovation	2021-09-01	2022	June	2022-06-01		63.45	6.77	26.11	30.57	185	106	118	409	479	18800	1566.67	994	572.667	36.5532	-9.0		0	0
Home 32	Renovation	2021-10-01	2022	June	2022-06-01		74.23	7.79	35.87	30.57	170	122	170	562	479	18800	1566.67	1163	403.667	25.766	-8.0		0	0
Home 32	Renovation	2021-11-01	2022	June	2022-06-01		73.09	8.94	33.57	30.57	219	140	125	526	479	18800	1566.67	1145	421.667	26.9149	-7.0		0	0
Home 32	Renovation	2021-12-01	2022	June	2022-06-01		69.13	10.47	28.09	30.57	222	164	178	440	479	18800	1566.67	1083	483.667	30.8723	-6.0		0	0
Home 32	Renovation	2022-01-01	2022	June	2022-06-01		76.48	12.87	29.91	33.7	249	207	148	481	542	19300	1608.33	1230	378.333	23.5233	-5.0		0	0
Home 32	Renovation	2022-02-01	2022	June	2022-06-01		80.39	13.24	33.45	33.7	265	213	112	538	542	19300	1608.33	1293	315.333	19.6062	-4.0		0	0
Home 32	Renovation	2022-03-01	2022	June	2022-06-01		81.33	11.81	35.81	33.7	254	190	78	576	542	19300	1608.33	1308	300.333	18.6736	-3.0		0	0
Home 32	Renovation	2022-04-01	2022	June	2022-06-01		73.24	10.45	29.1	33.7	250	168	80	468	542	19300	1608.33	1178	430.333	26.7565	-2.0		0	0
Home 32	Renovation	2022-05-01	2022	June	2022-06-01		71.75	9.26	28.79	33.7	238	149	55	463	542	19300	1608.33	1154	454.333	28.2487	-1.0		0	0
Home 32	Renovation	2022-06-01	2022	June	2022-06-01		66.65	5.84	27.11	33.7	222	94	33	436	542	19300	1608.33	1072	536.333	33.3472	0.0		1	0
Home 32	Renovation	2022-07-01	2022	June	2022-06-01		79.83	5.66	40.48	33.7	200	91	34	651	542	19300	1608.33	1284	324.333	20.1658	1.0		1	0
Home 32	Renovation	2022-08-01	2022	June	2022-06-01		73.18	5.91	33.58	33.7	252	95	34	540	542	19300	1608.33	1177	431.333	26.8187	2.0		1	0
Home 32	Renovation	2022-09-01	2022	June	2022-06-01		67.34	6.65	26.98	33.7	224	107	39	434	542	19300	1608.33	1083	525.333	32.6632	3.0		1	0
Home 32	Renovation	2022-10-01	2022	June	2022-06-01		73.37	7.71	31.96	33.7	222	124	54	514	542	19300	1608.33	1180	428.333	26.6321	4.0		1	0
Home 32	Renovation	2022-11-01	2022	June	2022-06-01		79.21	8.7	36.81	33.7	250	140	65	592	542	19300	1608.33	1274	334.333	20.7876	5.0		1	0
Home 32	Renovation	2022-12-01	2022	June	2022-06-01		81.58	10.13	37.74	33.7	212	163	78	607	542	19300	1608.33	1312	296.333	18.4249	6.0		1	0
Home 32	Renovation	2023-01-01	2022	June	2022-06-01		95.88	13.24	47.88	34.76	249	214	110	774	562	19400	1616.67	1550	66.6667	4.12371	7.0		1	0
Home 32	Renovation	2023-02-01	2022	June	2022-06-01		83.81	13.73	35.32	34.76	243	222	166	571	562	19400	1616.67	1355	261.667	16.1856	8.0		1	0
Home 32	Renovation	2023-03-01	2022	June	2022-06-01		79.86	12.19	32.91	34.76	236	197	113	532	562	19400	1616.67	1291	325.667	20.1443	9.0		1	0
Home 32	Renovation	2023-04-01	2022	June	2022-06-01		82.21	10.82	36.62	34.76	235	175	71	592	562	19400	1616.67	1329	287.667	17.7938	10.0		1	0
Home 32	Renovation	2023-05-01	2022	June	2022-06-01		91.11	9.71	46.64	34.76	232	157	71	754	562	19400	1616.67	1473	143.667	8.8866	11.0		1	0
Home 32	Renovation	2023-06-01	2022	June	2022-06-01		83.26	8.6	39.9	34.76	232	139	41	645	562	19400	1616.67	1346	270.667	16.7423	12.0		1	0
Home 32	Renovation	2023-07-01	2022	June	2022-06-01		78.06	8.35	34.95	34.76	237	135	51	565	562	19400	1616.67	1262	354.667	21.9381	13.0		1	0
Home 32	Renovation	2023-08-01	2022	June	2022-06-01		73.11	8.72	29.63	34.76	241	141	43	479	562	19400	1616.67	1182	434.667	26.8866	14.0		1	0
Home 32	Renovation	2023-09-01	2022	June	2022-06-01		79.18	9.9	34.52	34.76	242	160	45	558	562	19400	1616.67	1280	336.667	20.8247	15.0		1	0
Home 32	Renovation	2023-10-01	2022	June	2022-06-01		73.92	11.44	27.71	34.76	246	185	62	448	562	19400	1616.67	1195	421.667	26.0825	16.0		1	0
Home 32	Renovation	2023-11-01	2022	June	2022-06-01		85.86	12.87	38.23	34.76	249	208	38	618	562	19400	1616.67	1388	228.667	14.1443	17.0		1	0
Home 32	Renovation	2023-12-01	2022	June	2022-06-01		91.05	15.15	41.13	34.76	257	245	50	665	562	19400	1616.67	1472	144.667	8.94845	18.0		1	0
Home 32	Renovation	2024-01-01	2022	June	2022-06-01		78.07	12.83	30.6	34.64	234	216	95	515	583	20198	1683.17	1314	369.167	21.9329	19.0		1	0
Home 32	Renovation	2024-02-01	2022	June	2022-06-01		77.65	11.35	31.67	34.64	233	191	116	533	583	20198	1683.17	1307	376.167	22.3487	20.0		1	0
Home 32	Renovation	2024-03-01	2022	June	2022-06-01		87.93	9.98	43.31	34.64	230	168	153	729	583	20198	1683.17	1480	203.167	12.0705	21.0		1	0
Home 32	Renovation	2024-04-01	2022	June	2022-06-01		80.38	8.73	37.01	34.64	282	147	133	623	583	20198	1683.17	1353	330.167	19.6158	22.0		1	0
Home 32	Renovation	2024-05-01	2022	June	2022-06-01		84.42	7.84	41.94	34.64	227	132	70	706	583	20198	1683.17	1421	262.167	15.5758	23.0		1	0
Home 32	Renovation	2024-06-01	2022	June	2022-06-01		75.75	6.95	34.16	34.64	210	117	49	575	583	20198	1683.17	1275	408.167	24.2499	24.0		1	0
Home 32	Renovation	2024-07-01	2022	June	2022-06-01		74.74	6.83	33.27	34.64	222	115	24	560	583	20198	1683.17	1258	425.167	25.2599	25.0		1	0
Home 32	Renovation	2024-08-01	2022	June	2022-06-01		78.19	7.13	36.42	34.64	244	120	33	613	583	20198	1683.17	1316	367.167	21.814	26.0		1	0
Home 32	Renovation	2024-09-01	2022	June	2022-06-01		73.43	8.02	30.78	34.64	189	135	38	518	583	20198	1683.17	1236	447.167	26.567	27.0		1	0
Home 32	Renovation	2024-10-01	2022	June	2022-06-01		77.89	9.27	33.98	34.64	235	156	47	572	583	20198	1683.17	1311	372.167	22.1111	28.0		1	0
Home 32	Renovation	2024-11-01	2022	June	2022-06-01		90.31	10.52	45.15	34.64	225	177	54	760	583	20198	1683.17	1520	163.167	9.69403	29.0		1	0
Home 32	Renovation	2024-12-01	2022	June	2022-06-01		83.53	12.3	36.6	34.64	248	207	58	616	583	20198	1683.17	1406	277.167	16.467	30.0		1	0
Home 33	Renovation	2020-01-01	2023	Jan			60.0	10.44	22.97	26.58	257	275	103	605	700	31600	2633.33	1580	1053.33	40			0	0
Home 33	Renovation	2020-02-01	2023	Jan			60.61	9.95	24.08	26.58	276	262	158	634	700	31600	2633.33	1596	1037.33	39.3924			0	0
Home 33	Renovation	2020-03-01	2023	Jan			55.94	8.7	20.66	26.58	275	229	94	544	700	31600	2633.33	1473	1160.33	44.0633			0	0
Home 33	Renovation	2020-04-01	2023	Jan			63.87	7.59	29.7	26.58	239	200	96	782	700	31600	2633.33	1682	951.333	36.1266			0	0
Home 33	Renovation	2020-05-01	2023	Jan			60.0	6.87	26.54	26.58	304	181	111	699	700	31600	2633.33	1580	1053.33	40			0	0
Home 33	Renovation	2020-06-01	2023	Jan			61.1	6.11	28.41	26.58	266	161	51	748	700	31600	2633.33	1609	1024.33	38.8987			0	0
Home 33	Renovation	2020-07-01	2023	Jan			53.7	5.96	21.15	26.58	278	157	35	557	700	31600	2633.33	1414	1219.33	46.3038			0	0
Home 33	Renovation	2020-08-01	2023	Jan			58.59	6.34	25.67	26.58	254	167	57	676	700	31600	2633.33	1543	1090.33	41.4051			0	0
Home 33	Renovation	2020-09-01	2023	Jan			60.68	6.99	27.11	26.58	272	184	93	714	700	31600	2633.33	1598	1035.33	39.3165			0	0
Home 33	Renovation	2020-10-01	2023	Jan			63.27	8.05	28.63	26.58	248	212	140	754	700	31600	2633.33	1666	967.333	36.7342			0	0
Home 33	Renovation	2020-11-01	2023	Jan			55.33	9.11	19.63	26.58	265	240	95	517	700	31600	2633.33	1457	1176.33	44.6709			0	0
Home 33	Renovation	2020-12-01	2023	Jan			60.8	10.75	23.47	26.58	268	283	167	618	700	31600	2633.33	1601	1032.33	39.2025			0	0
Home 33	Renovation	2021-01-01	2023	Jan			64.91	11.32	26.7	26.89	289	302	132	712	717	32000	2666.67	1731	935.667	35.0875			0	0
Home 33	Renovation	2021-02-01	2023	Jan			66.9	10.95	29.06	26.89	321	292	128	775	717	32000	2666.67	1784	882.667	33.1			0	0
Home 33	Renovation	2021-03-01	2023	Jan			61.42	9.75	24.79	26.89	298	260	178	661	717	32000	2666.67	1638	1028.67	38.575			0	0
Home 33	Renovation	2021-04-01	2023	Jan			68.32	8.55	32.89	26.89	306	228	68	877	717	32000	2666.67	1822	844.667	31.675			0	0
Home 33	Renovation	2021-05-01	2023	Jan			60.15	7.58	25.69	26.89	279	202	76	685	717	32000	2666.67	1604	1062.67	39.85			0	0
Home 33	Renovation	2021-06-01	2023	Jan			56.59	6.79	22.91	26.89	266	181	63	611	717	32000	2666.67	1509	1157.67	43.4125			0	0
Home 33	Renovation	2021-07-01	2023	Jan			63.23	6.52	29.81	26.89	239	174	63	795	717	32000	2666.67	1686	980.667	36.775			0	0
Home 33	Renovation	2021-08-01	2023	Jan			61.54	6.94	27.71	26.89	268	185	59	739	717	32000	2666.67	1641	1025.67	38.4625			0	0
Home 33	Renovation	2021-09-01	2023	Jan			63.86	7.8	29.18	26.89	257	208	77	778	717	32000	2666.67	1703	963.667	36.1375			0	0
Home 33	Renovation	2021-10-01	2023	Jan			64.01	8.93	28.2	26.89	292	238	88	752	717	32000	2666.67	1707	959.667	35.9875			0	0
Home 33	Renovation	2021-11-01	2023	Jan			71.36	10.24	34.24	26.89	250	273	122	913	717	32000	2666.67	1903	763.667	28.6375			0	0
Home 33	Renovation	2021-12-01	2023	Jan			72.64	11.92	33.83	26.89	285	318	137	902	717	32000	2666.67	1937	729.667	27.3625			0	0
Home 33	Renovation	2022-01-01	2023	Jan			74.27	10.21	36.0	28.06	302	279	114	984	767	32800	2733.33	2030	703.333	25.7317			0	0
Home 33	Renovation	2022-02-01	2023	Jan			68.12	9.07	30.99	28.06	345	248	70	847	767	32800	2733.33	1862	871.333	31.878			0	0
Home 33	Renovation	2022-03-01	2023	Jan			71.38	8.12	35.2	28.06	273	222	68	962	767	32800	2733.33	1951	782.333	28.622			0	0
Home 33	Renovation	2022-04-01	2023	Jan			70.24	7.02	35.16	28.06	310	192	51	961	767	32800	2733.33	1920	813.333	29.7561			0	0
Home 33	Renovation	2022-05-01	2023	Jan			65.93	6.29	31.57	28.06	299	172	52	863	767	32800	2733.33	1802	931.333	34.0732			0	0
Home 33	Renovation	2022-06-01	2023	Jan			75.37	5.63	41.67	28.06	269	154	32	1139	767	32800	2733.33	2060	673.333	24.6341			0	0
Home 33	Renovation	2022-07-01	2023	Jan			65.93	5.45	32.41	28.06	285	149	22	886	767	32800	2733.33	1802	931.333	34.0732			0	0
Home 33	Renovation	2022-08-01	2023	Jan			66.26	5.78	32.41	28.06	273	158	42	886	767	32800	2733.33	1811	922.333	33.7439			0	0
Home 33	Renovation	2022-09-01	2023	Jan			69.18	6.44	34.68	28.06	286	176	36	948	767	32800	2733.33	1891	842.333	30.8171			0	0
Home 33	Renovation	2022-10-01	2023	Jan			68.2	7.43	32.71	28.06	310	203	48	894	767	32800	2733.33	1864	869.333	31.8049			0	0
Home 33	Renovation	2022-11-01	2023	Jan			72.66	8.45	36.15	28.06	365	231	60	988	767	32800	2733.33	1986	747.333	27.3415			0	0
Home 33	Renovation	2022-12-01	2023	Jan			72.44	9.95	34.43	28.06	332	272	108	941	767	32800	2733.33	1980	753.333	27.561			0	0
Home 33	Renovation	2023-01-01	2023	Jan			72.11	9.43	32.57	30.11	316	261	55	901	833	33200	2766.67	1995	771.667	27.8916			0	0
Home 33	Renovation	2023-02-01	2023	Jan			71.89	8.71	33.07	30.11	306	241	184	915	833	33200	2766.67	1989	777.667	28.1084			0	0
Home 33	Renovation	2023-03-01	2023	Jan			75.8	7.7	37.99	30.11	296	213	97	1051	833	33200	2766.67	2097	669.667	24.2048			0	0
Home 33	Renovation	2023-04-01	2023	Jan			74.02	6.69	37.23	30.11	288	185	60	1030	833	33200	2766.67	2048	718.667	25.9759			0	0
Home 33	Renovation	2023-05-01	2023	Jan			70.95	6.04	34.81	30.11	287	167	44	963	833	33200	2766.67	1963	803.667	29.0482			0	0
Home 33	Renovation	2023-06-01	2023	Jan			73.92	5.31	38.49	30.11	286	147	36	1065	833	33200	2766.67	2045	721.667	26.0843			0	0
Home 33	Renovation	2023-07-01	2023	Jan			70.16	5.2	34.84	30.11	295	144	33	964	833	33200	2766.67	1941	825.667	29.8434			0	0
Home 33	Renovation	2023-08-01	2023	Jan			82.37	5.49	46.77	30.11	301	152	34	1294	833	33200	2766.67	2279	487.667	17.6265			0	0
Home 33	Renovation	2023-09-01	2023	Jan			67.95	6.11	31.73	30.11	296	169	39	878	833	33200	2766.67	1880	886.667	32.0482			0	0
Home 33	Renovation	2023-10-01	2023	Jan			69.61	7.12	32.39	30.11	304	197	42	896	833	33200	2766.67	1926	840.667	30.3855			0	0
Home 33	Renovation	2023-11-01	2023	Jan			74.39	8.06	36.22	30.11	311	223	40	1002	833	33200	2766.67	2058	708.667	25.6145			0	0
Home 33	Renovation	2023-12-01	2023	Jan			73.52	9.36	34.05	30.11	315	259	47	942	833	33200	2766.67	2034	732.667	26.4819			0	0
Home 33	Renovation	2024-01-01	2023	Jan			76.65	8.02	38.02	30.61	327	238	97	1128	908	35600	2966.67	2274	692.667	23.3483			0	0
Home 33	Renovation	2024-02-01	2023	Jan			71.53	7.18	33.74	30.61	363	213	117	1001	908	35600	2966.67	2122	844.667	28.4719			0	0
Home 33	Renovation	2024-03-01	2023	Jan			71.9	6.44	34.85	30.61	269	191	92	1034	908	35600	2966.67	2133	833.667	28.1011			0	0
Home 33	Renovation	2024-04-01	2023	Jan			70.08	5.63	33.84	30.61	283	167	29	1004	908	35600	2966.67	2079	887.667	29.9213			0	0
Home 33	Renovation	2024-05-01	2023	Jan			71.39	5.06	35.73	30.61	292	150	56	1060	908	35600	2966.67	2118	848.667	28.6067			0	0
Home 33	Renovation	2024-06-01	2023	Jan			62.7	4.45	27.64	30.61	255	132	36	820	908	35600	2966.67	1860	1106.67	37.3034			0	0
Home 33	Renovation	2024-07-01	2023	Jan			69.67	4.38	34.69	30.61	267	130	30	1029	908	35600	2966.67	2067	899.667	30.3258			0	0
Home 33	Renovation	2024-08-01	2023	Jan			61.31	4.58	26.12	30.61	241	136	28	775	908	35600	2966.67	1819	1147.67	38.6854			0	0
Home 33	Renovation	2024-09-01	2023	Jan			62.22	5.12	26.49	30.61	254	152	49	786	908	35600	2966.67	1846	1120.67	37.7753			0	0
Home 33	Renovation	2024-10-01	2023	Jan			69.74	5.87	33.27	30.61	287	174	55	987	908	35600	2966.67	2069	897.667	30.2584			0	0
Home 33	Renovation	2024-11-01	2023	Jan			68.49	6.78	31.11	30.61	272	201	37	923	908	35600	2966.67	2032	934.667	31.5056			0	0
Home 33	Renovation	2024-12-01	2023	Jan			73.85	7.82	35.43	30.61	319	232	57	1051	908	35600	2966.67	2191	775.667	26.1461			0	0
Home 34	Control	2020-01-01					43.71	5.96	15.54	22.21	110	143	69	373	533	28800	2400	1049	1351	56.2917			0	0
Home 34	Control	2020-02-01					43.17	5.67	15.29	22.21	110	136	60	367	533	28800	2400	1036	1364	56.8333			0	0
Home 34	Control	2020-03-01					44.88	5.04	17.62	22.21	104	121	58	423	533	28800	2400	1077	1323	55.125			0	0
Home 34	Control	2020-04-01					41.04	4.38	14.46	22.21	109	105	61	347	533	28800	2400	985	1415	58.9583			0	0
Home 34	Control	2020-05-01					40.0	3.88	13.92	22.21	104	93	51	334	533	28800	2400	960	1440	60			0	0
Home 34	Control	2020-06-01					38.5	3.46	12.83	22.21	100	83	37	308	533	28800	2400	924	1476	61.5			0	0
Home 34	Control	2020-07-01					39.0	3.38	13.42	22.21	101	81	35	322	533	28800	2400	936	1464	61			0	0
Home 34	Control	2020-08-01					38.58	3.54	12.83	22.21	99	85	37	308	533	28800	2400	926	1474	61.4167			0	0
Home 34	Control	2020-09-01					40.5	4.04	14.25	22.21	111	97	39	342	533	28800	2400	972	1428	59.5			0	0
Home 34	Control	2020-10-01					38.88	4.58	12.08	22.21	112	110	60	290	533	28800	2400	933	1467	61.125			0	0
Home 34	Control	2020-11-01					39.54	5.29	12.04	22.21	105	127	78	289	533	28800	2400	949	1451	60.4583			0	0
Home 34	Control	2020-12-01					40.92	6.21	12.5	22.21	112	149	99	300	533	28800	2400	982	1418	59.0833			0	0
Home 34	Control	2021-01-01					39.64	6.0	11.32	22.32	115	150	104	283	558	30000	2500	991	1509	60.36			0	0
Home 34	Control	2021-02-01					39.92	5.68	11.92	22.32	136	142	88	298	558	30000	2500	998	1502	60.08			0	0
Home 34	Control	2021-03-01					37.24	5.04	9.88	22.32	114	126	70	247	558	30000	2500	931	1569	62.76			0	0
Home 34	Control	2021-04-01					38.36	4.36	11.68	22.32	119	109	63	292	558	30000	2500	959	1541	61.64			0	0
Home 34	Control	2021-05-01					41.52	3.92	15.28	22.32	129	98	43	382	558	30000	2500	1038	1462	58.48			0	0
Home 34	Control	2021-06-01					40.8	3.52	14.96	22.32	110	88	29	374	558	30000	2500	1020	1480	59.2			0	0
Home 34	Control	2021-07-01					38.84	3.4	13.12	22.32	97	85	29	328	558	30000	2500	971	1529	61.16			0	0
[truncated: 10,181 more rows]
